# Supplementary material for: MeJA regulates the accumulation of baicalein and other 4’-hydroxyflavones during the hollowed root development in Scutellaria baicalensis
Source: Front Plant Sci. 2023 Jan 6;13:1067847. doi: 10.3389/fpls.2022.1067847 (PMC9853287; doi:10.3389/fpls.2022.1067847)
Supplement: Supplementary file 3 [file Table_2.xls]

## Sheet: Sheet1
Supplemental Table 2.Data sets Differental expressing genes in 3 years roots with rotten core.
gene name	2 years roots FPKM	3YNRC FPKM	Log 2 Foldchange	P-value	Q-value	GO Orthology	KEEG Orthology	BLAST results
Sb01g00350	1.17775	4.61774	1.97115	0.000346065	0.0285892	GO:0006464,GO:0006508,GO:0006511,GO:0006807,GO:0008150,GO:0008152,GO:0009056,GO:0009057,GO:0009987,GO:0016567,GO:0019538,GO:0019941,GO:0030163,GO:0032446,GO:0036211,GO:0043170,GO:0043412,GO:0043632,GO:0044237,GO:0044238,GO:0044248,GO:0044257,GO:0044260,GO:0044265,GO:0044267,GO:0051603,GO:0070647,GO:0071704,GO:1901564,GO:1901565,GO:1901575	NOT SIGIFICANT	F-box protein SKIP31 OS=Arabidopsis thaliana OX=3702 GN=SKIP31 PE=1 SV=1	正调控凋亡
Sb01g00820	1.55129	0.426097	-1.86422	0.00101419	0.0438079	NOT SIGIFICANT	K11366	Ubiquitin C-terminal hydrolase 22 OS=Arabidopsis thaliana OX=3702 GN=UBP22 PE=1 SV=1	泛素酶
Sb01g01520	0.0274962	1.68207	5.93486	7.96124e-05	0.0158692	NOT SIGIFICANT	K09286	Dehydration-responsive element-binding protein 2 OS=Arabidopsis thaliana OX=3702 GN=DREB2 PE=2 SV=1	负调控抗病
Sb01g34300	52.1719	128.039	1.29523	0.000268729	0.000490769	GO:0003674,GO:0003824,GO:0005488,GO:0005575,GO:0005622,GO:0005623,GO:0005737,GO:0008150,GO:0008152,GO:0008168,GO:0008171,GO:0009058,GO:0009718,GO:0009812,GO:0009813,GO:0016137,GO:0016138,GO:0016740,GO:0016741,GO:0032259,GO:0033485,GO:0033486,GO:0042440,GO:0043167,GO:0043169,GO:0043473,GO:0044424,GO:0044464,GO:0046148,GO:0046283,GO:0046872,GO:0071704,GO:1901038,GO:1901135,GO:1901137,GO:1901576,GO:…	K00588	FAOMT_VITVI Flavonoid 3',5'-methyltransferase OS=Vitis vinifera OX=29760 GN=FAOMT PE=1 SV=1	SbPFOMT-5
Sb03g20740	8.44547	71.7077	3.08588	0.000721703	0.000806607	NOT SIGIFICANT	K23179	Cytochrome P450 93B2 OS=Gerbera hybrida OX=18101 GN=CYP93B2 PE=1 SV=1	SbFNSII-2
Sb09g15450	66.9119	163.589	1.28974	0.00234172	0.0103813	GO:0003674,GO:0003824,GO:0004321,GO:0005575,GO:0005622,GO:0005623,GO:0005737,GO:0005777,GO:0006082,GO:0008150,GO:0008152,GO:0009058,GO:0009694,GO:0009695,GO:0009987,GO:0010817,GO:0016053,GO:0016408,GO:0016740,GO:0016746,GO:0016747,GO:0019752,GO:0032787,GO:0042445,GO:0042446,GO:0042579,GO:0043226,GO:0043227,GO:0043229,GO:0043231,GO:0043436,GO:0044237,GO:0044249,GO:0044281,GO:0044283,GO:0044424,GO:…	K01904	Probable CoA ligase CCL7 OS=Humulus lupulus OX=3486 GN=CCL7 PE=2 SV=1	SbCLL-7
Sb03g24340	22.0245	115.638	2.39243	0.00131222	0.0141072	GO:0000325,GO:0003674,GO:0003824,GO:0005575,GO:0005622,GO:0005623,GO:0005634,GO:0005737,GO:0005773,GO:0005774,GO:0005783,GO:0005789,GO:0008150,GO:0008152,GO:0009058,GO:0009314,GO:0009411,GO:0009416,GO:0009628,GO:0009705,GO:0009719,GO:0009725,GO:0009733,GO:0009812,GO:0009813,GO:0010033,GO:0010224,GO:0012505,GO:0016020,GO:0016853,GO:0016872,GO:0019898,GO:0031090,GO:0031312,GO:0031984,GO:0042175,GO:…	K01859	Chalcone--flavanone isomerase OS=Camellia sinensis OX=4442 GN=CHI PE=2 SV=2	SbCHI
Sb09g03510	14.1271	33.9268	1.26396	1.52352e-06	1.68756e-06	GO:0003674,GO:0003824,GO:0008150,GO:0008152,GO:0009058,GO:0009812,GO:0009813,GO:0016210,GO:0016740,GO:0016746,GO:0016747,GO:0071704,GO:1901576	K00660	CHSY_PERFR Chalcone synthase OS=Perilla frutescens OX=48386 GN=CHS PE=2 SV=1	SbCHS-2
Sb01g39830	31.7907	183.677	2.5305	3.69869e-06	4.56158e-06	NOT SIGIFICANT	NOT SIGIFICANT	Cytochrome P450 82A3 OS=Glycine max OX=3847 GN=CYP82A3 PE=2 SV=1	SbF8H
Sb01g01770	1.00521	3.26295	1.69867	0.00106932	0.0447653	NOT SIGIFICANT	NOT SIGIFICANT	NOT SIGIFICANT
Sb01g03140	2.0407	12.7596	2.64445	0.000585572	0.0354394	NOT SIGIFICANT	NOT SIGIFICANT	F-box/LRR-repeat protein At3g03360 OS=Arabidopsis thaliana OX=3702 GN=At3g03360 PE=2 SV=2	功能位置
Sb01g03610	325.325	129.605	-1.32776	0.000205429	0.0241263	NOT SIGIFICANT	NOT SIGIFICANT	NOT SIGIFICANT
Sb01g32610	1.95675	5.48144	1.48609	4.35038e-06	1.12955e-05	GO:0003674,GO:0003824,GO:0005575,GO:0005576,GO:0006508,GO:0006807,GO:0008150,GO:0008152,GO:0008233,GO:0008234,GO:0016787,GO:0019538,GO:0043170,GO:0044238,GO:0048046,GO:0070011,GO:0071704,GO:0140096,GO:1901564	K04399	Metacaspase-9 OS=Arabidopsis thaliana OX=3702 GN=AMC9 PE=1 SV=1	拟南芥MC9
Sb01g53940	1.42938	4.43923	1.63492	7.81954e-05	0.000107795	GO:0008150,GO:0010941,GO:0043067,GO:0043069,GO:0048519,GO:0048523,GO:0050789,GO:0050794,GO:0060548,GO:0065007	K01370	Metacaspase-1 OS=Arabidopsis thaliana OX=3702 GN=AMC1 PE=1 SV=1	拟南芥MC1
Sb01g03700	0.0641538	1.03876	4.01719	0.000172591	0.0223207	NOT SIGIFICANT	NOT SIGIFICANT	NOT SIGIFICANT
Sb01g04610	2.48289	23.0887	3.21709	0.000387015	0.0299241	NOT SIGIFICANT	NOT SIGIFICANT	NOT SIGIFICANT
Sb01g04620	4.75189	31.3133	2.7202	5.32872e-05	0.0130087	NOT SIGIFICANT	NOT SIGIFICANT	NOT SIGIFICANT
Sb01g05000	0.612543	0.00955366	-6.00261	2.74885e-06	0.00497701	GO:0001101,GO:0003674,GO:0003824,GO:0004022,GO:0005575,GO:0005622,GO:0005623,GO:0005737,GO:0005829,GO:0006066,GO:0006082,GO:0006520,GO:0006560,GO:0006561,GO:0006629,GO:0006714,GO:0006720,GO:0006721,GO:0006807,GO:0006950,GO:0007154,GO:0007165,GO:0008150,GO:0008152,GO:0008299,GO:0008610,GO:0008652,GO:0009058,GO:0009064,GO:0009084,GO:0009266,GO:0009408,GO:0009414,GO:0009415,GO:0009628,GO:0009687,GO:…	K09841	Xanthoxin dehydrogenase OS=Arabidopsis thaliana OX=3702 GN=ABA2 PE=1 SV=1	ABA合成酶之一
Sb01g05690	0.0103545	0.572221	5.78825	4.63531e-05	0.0121339	GO:0003674,GO:0003824,GO:0004360,GO:0006002,GO:0006040,GO:0006047,GO:0006139,GO:0006464,GO:0006486,GO:0006487,GO:0006725,GO:0006793,GO:0006796,GO:0006807,GO:0008150,GO:0008152,GO:0008483,GO:0009058,GO:0009059,GO:0009100,GO:0009101,GO:0009225,GO:0009987,GO:0016740,GO:0016769,GO:0019538,GO:0019637,GO:0034641,GO:0034645,GO:0036211,GO:0043170,GO:0043412,GO:0043413,GO:0044237,GO:0044238,GO:0044249,GO:…	K00820	Glutamine--fructose-6-phosphate aminotransferase [isomerizing] 1 OS=Arabidopsis thaliana OX=3702 GN=GFAT1 PE=2 SV=1	N-氨基葡萄糖合成的一个每
Sb01g05820	1.09419	0.340389	-1.68461	0.00147982	0.049848	NOT SIGIFICANT	K03164	DNA topoisomerase 2 OS=Arabidopsis thaliana OX=3702 GN=TOP2 PE=2 SV=2	拓扑异构酶
Sb01g05930	15.1608	61.5475	2.02136	4.82361e-05	0.0124765	NOT SIGIFICANT	NOT SIGIFICANT	Tetraketide alpha-pyrone reductase 1 OS=Arabidopsis thaliana OX=3702 GN=TKPR1 PE=1 SV=1	花粉发育相关
Sb08g15290	103.591	217.392	1.0694	6.36602e-05	8.7724e-05
Sb01g06320	0.505768	1.618	1.67767	0.000319002	0.0276134	NOT SIGIFICANT	NOT SIGIFICANT	Polygalacturonase inhibitor 2 OS=Arabidopsis thaliana OX=3702 GN=PGIP2 PE=1 SV=1	被真菌感染诱导的抑制细胞壁果胶降解酶的蛋白
Sb01g07080	0.0108702	3.56713	8.35824	1.92425e-05	0.00995435	NOT SIGIFICANT	NOT SIGIFICANT	NOT SIGIFICANT
Sb01g07140	13.755	6.06857	-1.18053	0.000291365	0.0270534	GO:0003674,GO:0003824,GO:0005488,GO:0005515,GO:0005575,GO:0005622,GO:0005623,GO:0005737,GO:0006725,GO:0006766,GO:0006767,GO:0006772,GO:0006790,GO:0006807,GO:0007584,GO:0008150,GO:0008152,GO:0009058,GO:0009110,GO:0009228,GO:0009507,GO:0009532,GO:0009536,GO:0009570,GO:0009605,GO:0009987,GO:0009991,GO:0010033,GO:0010243,GO:0010266,GO:0014070,GO:0016462,GO:0016787,GO:0016817,GO:0016818,GO:0017144,GO:…	K03147	Phosphomethylpyrimidine synthase, chloroplastic OS=Arabidopsis thaliana OX=3702 GN=THIC PE=1 SV=1	VB1合成酶
Sb01g07560	0.85288	4.7741	2.48481	0.00103759	0.0440305	GO:0003674,GO:0003824,GO:0004721,GO:0005488,GO:0005515,GO:0005516,GO:0006464,GO:0006470,GO:0006793,GO:0006796,GO:0006807,GO:0008138,GO:0008150,GO:0008152,GO:0009987,GO:0016311,GO:0016787,GO:0016788,GO:0016791,GO:0019538,GO:0036211,GO:0042578,GO:0043170,GO:0043412,GO:0044237,GO:0044238,GO:0044260,GO:0044267,GO:0071704,GO:0140096,GO:1901564	K05766	Dual specificity protein phosphatase 1 OS=Arabidopsis thaliana OX=3702 GN=DSPTP1 PE=1 SV=1	钙调素下游的蛋白
Sb01g08150	25.942	12.3826	-1.06697	3.84663e-05	0.0121124	GO:0000988,GO:0000990,GO:0003674,GO:0005575,GO:0005622,GO:0005623,GO:0005737,GO:0006139,GO:0006351,GO:0006352,GO:0006355,GO:0006399,GO:0006725,GO:0006807,GO:0006996,GO:0008150,GO:0008152,GO:0009058,GO:0009059,GO:0009314,GO:0009416,GO:0009507,GO:0009536,GO:0009628,GO:0009639,GO:0009657,GO:0009658,GO:0009889,GO:0009987,GO:0010114,GO:0010467,GO:0010468,GO:0010556,GO:0016043,GO:0016070,GO:0016987,GO:…	K03086	RNA polymerase sigma factor sigB OS=Arabidopsis thaliana OX=3702 GN=SIGB PE=2 SV=2	叶绿体RNA合成酶
Sb01g09660	1.16464	11.5685	3.31224	0.00137978	0.0489045	NOT SIGIFICANT	NOT SIGIFICANT	NOT SIGIFICANT
Sb01g10360	0.0107002	0.534224	5.64174	6.66338e-07	0.00289551	NOT SIGIFICANT	NOT SIGIFICANT	Wall-associated receptor kinase 2 OS=Arabidopsis thaliana OX=3702 GN=WAK2 PE=1 SV=1	被真菌和MeJA诱导的抗性基因
Sb01g11770	16.696	6.76235	-1.30391	0.000878391	0.0409545	GO:0006139,GO:0006259,GO:0006304,GO:0006305,GO:0006306,GO:0006725,GO:0006807,GO:0008150,GO:0008152,GO:0009292,GO:0009294,GO:0009987,GO:0010216,GO:0032259,GO:0032776,GO:0034641,GO:0043170,GO:0043412,GO:0043414,GO:0044237,GO:0044238,GO:0044260,GO:0044728,GO:0044764,GO:0046483,GO:0051704,GO:0071704,GO:0090304,GO:1901360	K00558	DNA (cytosine-5)-methyltransferase CMT1 OS=Oryza sativa subsp. japonica OX=39947 GN=CMT1 PE=3 SV=1	染色质甲基化酶
Sb01g11930	2.17814	7.74236	1.82967	0.000619415	0.0365707	GO:0003674,GO:0003700,GO:0006355,GO:0008150,GO:0009889,GO:0010468,GO:0010556,GO:0019219,GO:0019222,GO:0031323,GO:0031326,GO:0050789,GO:0050794,GO:0051171,GO:0051252,GO:0060255,GO:0065007,GO:0080090,GO:0140110,GO:1903506,GO:2000112,GO:2001141	K09338	Homeobox-leucine zipper protein HAT14 OS=Arabidopsis thaliana OX=3702 GN=HAT14 PE=2 SV=3	亮氨酸拉链蛋白
Sb01g12120	0.61084	4.09096	2.74357	0.00143511	0.0494147	NOT SIGIFICANT	NOT SIGIFICANT	Probable plastid-lipid-associated protein 13, chloroplastic OS=Arabidopsis thaliana OX=3702 GN=PAP13 PE=1 SV=2	功能不明
Sb01g13360	4.73534	123.399	4.70372	8.4955e-05	0.0161914	GO:0000003,GO:0003006,GO:0003674,GO:0003824,GO:0006464,GO:0006486,GO:0006725,GO:0006807,GO:0007275,GO:0008150,GO:0008152,GO:0008194,GO:0009058,GO:0009059,GO:0009100,GO:0009101,GO:0009308,GO:0009653,GO:0009690,GO:0009791,GO:0009888,GO:0009889,GO:0009908,GO:0009965,GO:0009966,GO:0009987,GO:0010015,GO:0010016,GO:0010073,GO:0010075,GO:0010083,GO:0010154,GO:0010380,GO:0010646,GO:0010817,GO:0016740,GO:…	K13495	UDP-glycosyltransferase 73C4 OS=Arabidopsis thaliana OX=3702 GN=UGT73C4 PE=2 SV=1
Sb01g14610	0.995507	3.8404	1.94775	0.000700363	0.0381373	GO:0000003,GO:0001101,GO:0003006,GO:0003674,GO:0003824,GO:0004672,GO:0004674,GO:0005575,GO:0005622,GO:0005623,GO:0005634,GO:0005737,GO:0006464,GO:0006468,GO:0006793,GO:0006796,GO:0006807,GO:0007154,GO:0007165,GO:0007275,GO:0007568,GO:0007584,GO:0008150,GO:0008152,GO:0009593,GO:0009594,GO:0009605,GO:0009719,GO:0009725,GO:0009737,GO:0009738,GO:0009743,GO:0009755,GO:0009756,GO:0009791,GO:0009987,GO:…	K07198	SNF1-related protein kinase catalytic subunit alpha KIN10 OS=Arabidopsis thaliana OX=3702 GN=KIN10 PE=1 SV=3	正调控对根线虫的抗性
Sb01g14740	12.7339	2.73409	-2.21955	0.000442632	0.0315314	NOT SIGIFICANT	NOT SIGIFICANT	NOT SIGIFICANT
Sb01g15130	2.80415	8.79144	1.64854	0.000217092	0.0245665	NOT SIGIFICANT	K03626	Nascent polypeptide-associated complex subunit alpha-like protein 1 OS=Arabidopsis thaliana OX=3702 GN=At3g12390 PE=1 SV=1	NAC,功能不明
Sb01g16540	0.00983105	6.11634	9.28111	3.46654e-07	0.00376588	NOT SIGIFICANT	NOT SIGIFICANT	Disease resistance protein RPP8 OS=Arabidopsis thaliana OX=3702 GN=RPP8 PE=1 SV=2	RPP8
Sb01g16570	0.0107543	6.7406	9.29182	0.00145792	0.0494942	NOT SIGIFICANT	K13457	Disease resistance protein RPP13 OS=Arabidopsis thaliana OX=3702 GN=RPP13 PE=2 SV=2	RPP13
Sb01g16770	17.4791	5.39492	-1.69596	0.00017196	0.0223724	GO:0003674,GO:0003676,GO:0003723,GO:0003824,GO:0004518,GO:0004519,GO:0005488,GO:0005575,GO:0005622,GO:0005623,GO:0006139,GO:0006725,GO:0006807,GO:0008150,GO:0008152,GO:0009451,GO:0009987,GO:0016070,GO:0016787,GO:0016788,GO:0034641,GO:0043170,GO:0043226,GO:0043227,GO:0043229,GO:0043231,GO:0043412,GO:0044237,GO:0044238,GO:0044424,GO:0044464,GO:0046483,GO:0071704,GO:0090304,GO:0090305,GO:0097159,GO:…	NOT SIGIFICANT	Pentatricopeptide repeat-containing protein At5g04810, chloroplastic OS=Arabidopsis thaliana OX=3702 GN=PPR4 PE=1 SV=1
Sb01g17850	0.0163995	2.90027	7.46639	0.00135419	0.0488746	NOT SIGIFICANT	NOT SIGIFICANT	NOT SIGIFICANT
Sb01g17970	0.290428	1.23963	2.09365	0.0011729	0.0462497	NOT SIGIFICANT	K14638	Protein NRT1/ PTR FAMILY 5.4 OS=Arabidopsis thaliana OX=3702 GN=NPF5.4 PE=2 SV=1
Sb01g19790	46.8615	0.00918595	-12.3167	1.15202e-07	0.002503	GO:0003674,GO:0003676,GO:0003723,GO:0003729,GO:0003735,GO:0005198,GO:0005488,GO:0005575,GO:0005618,GO:0005622,GO:0005623,GO:0005634,GO:0005730,GO:0005737,GO:0005829,GO:0005840,GO:0005844,GO:0005886,GO:0005911,GO:0006412,GO:0006518,GO:0006807,GO:0008150,GO:0008152,GO:0009058,GO:0009059,GO:0009506,GO:0009507,GO:0009536,GO:0009987,GO:0010467,GO:0015935,GO:0016020,GO:0019538,GO:0022626,GO:0022627,GO:…	K02981	40S ribosomal protein S2-4 OS=Arabidopsis thaliana OX=3702 GN=RPS2D PE=2 SV=1
Sb01g19800	46.8615	0.0108623	-12.0749	1.15202e-07	0.002503	GO:0000149,GO:0002791,GO:0002792,GO:0002793,GO:0003674,GO:0005096,GO:0005488,GO:0005515,GO:0005575,GO:0005622,GO:0005623,GO:0005737,GO:0005886,GO:0008047,GO:0008150,GO:0010646,GO:0010648,GO:0010817,GO:0016020,GO:0017016,GO:0017137,GO:0017157,GO:0019899,GO:0019905,GO:0023051,GO:0023057,GO:0030234,GO:0030695,GO:0031267,GO:0032879,GO:0032880,GO:0033500,GO:0042592,GO:0042593,GO:0043085,GO:0043087,GO:…	K08518	40S ribosomal protein S2-4 OS=Arabidopsis thaliana OX=3702 GN=RPS2D PE=2 SV=1
Sb01g20500	2.62606	0.551619	-2.25115	0.000254427	0.025127	GO:0000242,GO:0000278,GO:0000281,GO:0000910,GO:0000911,GO:0000919,GO:0000922,GO:0005575,GO:0005622,GO:0005623,GO:0005737,GO:0005813,GO:0005814,GO:0005815,GO:0005819,GO:0005828,GO:0005856,GO:0005874,GO:0005876,GO:0005929,GO:0007049,GO:0007275,GO:0007346,GO:0008104,GO:0008150,GO:0009553,GO:0009555,GO:0009987,GO:0010564,GO:0015630,GO:0016043,GO:0022402,GO:0022607,GO:0032465,GO:0032467,GO:0032501,GO:…	K16547	Protein NEDD1 OS=Arabidopsis thaliana OX=3702 GN=NEDD1 PE=2 SV=1
Sb01g20880	0.0105265	5.1243	8.92719	5.40285e-05	0.0130431	NOT SIGIFICANT	NOT SIGIFICANT	NOT SIGIFICANT
Sb01g20900	0.568262	2.75802	2.27901	0.000279764	0.026428	GO:0000018,GO:0005575,GO:0005622,GO:0005623,GO:0005634,GO:0005655,GO:0005730,GO:0006139,GO:0006259,GO:0006282,GO:0006304,GO:0006305,GO:0006306,GO:0006325,GO:0006342,GO:0006355,GO:0006725,GO:0006807,GO:0006996,GO:0008150,GO:0008152,GO:0009889,GO:0009890,GO:0009892,GO:0009987,GO:0010035,GO:0010038,GO:0010468,GO:0010556,GO:0010558,GO:0010569,GO:0010605,GO:0010629,GO:0016043,GO:0016070,GO:0016458,GO:…	NOT SIGIFICANT	Factor of DNA methylation 3 OS=Arabidopsis thaliana OX=3702 GN=FDM3 PE=4 SV=1
Sb01g20970	17.0159	0.00929231	-10.8386	6.39472e-06	0.00771878	NOT SIGIFICANT	K09458	3-oxoacyl-[acyl-carrier-protein] synthase I, chloroplastic OS=Arabidopsis thaliana OX=3702 GN=KAS1 PE=1 SV=2	脂肪酸合成的关键酶
Sb01g21010	4.04092	0.568894	-2.82845	0.0012485	0.0472582	NOT SIGIFICANT	NOT SIGIFICANT	Tetraspanin-10 OS=Arabidopsis thaliana OX=3702 GN=TET10 PE=2 SV=1
Sb01g23300	1.58925	5.68317	1.83835	0.000125965	0.0196895	GO:0000003,GO:0000280,GO:0003006,GO:0003674,GO:0003700,GO:0003824,GO:0004672,GO:0004674,GO:0005575,GO:0005622,GO:0005623,GO:0005634,GO:0005737,GO:0005829,GO:0006355,GO:0006464,GO:0006468,GO:0006793,GO:0006796,GO:0006807,GO:0006996,GO:0007049,GO:0007140,GO:0007154,GO:0007165,GO:0007275,GO:0007276,GO:0008150,GO:0008152,GO:0009719,GO:0009725,GO:0009733,GO:0009791,GO:0009888,GO:0009889,GO:0009987,GO:…	NOT SIGIFICANT	Transcription factor bHLH157 OS=Arabidopsis thaliana OX=3702 GN=BHLH157 PE=1 SV=1
Sb01g23360	1.33031	7.57682	2.50983	0.000318066	0.0276425	NOT SIGIFICANT	K11153	Short-chain dehydrogenase TIC 32 B, chloroplastic OS=Brassica napus OX=3708 GN=TIC32B PE=3 SV=1
Sb01g23930	8.34938	22.171	1.40893	3.82757e-05	0.0122296	NOT SIGIFICANT	NOT SIGIFICANT	Tetraspanin-3 OS=Arabidopsis thaliana OX=3702 GN=TET3 PE=1 SV=1	抗病毒
Sb01g24260	8.55415	1.24752	-2.77757	0.000301021	0.0273652	GO:0000027,GO:0003674,GO:0003676,GO:0003723,GO:0003735,GO:0005198,GO:0005488,GO:0005575,GO:0005622,GO:0005623,GO:0005737,GO:0005829,GO:0005840,GO:0006412,GO:0006518,GO:0006807,GO:0006996,GO:0008150,GO:0008152,GO:0009058,GO:0009059,GO:0009507,GO:0009526,GO:0009532,GO:0009536,GO:0009570,GO:0009941,GO:0009987,GO:0010467,GO:0015934,GO:0016020,GO:0016043,GO:0019538,GO:0019843,GO:0022607,GO:0022613,GO:…	K02867	50S ribosomal protein L11, chloroplastic OS=Arabidopsis thaliana OX=3702 GN=RPL11 PE=2 SV=1
Sb01g25880	3.96876	22.306	2.49067	0.000797389	0.039645	NOT SIGIFICANT	NOT SIGIFICANT	Pectinesterase inhibitor 7 OS=Arabidopsis thaliana OX=3702 GN=PMEI7 PE=2 SV=1	果胶甲酯酶抑制剂
Sb01g26530	8.12171	20.7547	1.35358	3.60834e-05	0.0118785	NOT SIGIFICANT	NOT SIGIFICANT	NOT SIGIFICANT
Sb01g26910	1.19227	2.38808	1.00214	0.000112278	0.0184808	NOT SIGIFICANT	NOT SIGIFICANT	NOT SIGIFICANT
Sb01g26980	12.7227	2.63988	-2.26886	0.0014433	0.0495395	GO:0000003,GO:0003006,GO:0003674,GO:0003824,GO:0004842,GO:0005575,GO:0005622,GO:0005623,GO:0005737,GO:0005777,GO:0005778,GO:0005829,GO:0006082,GO:0006464,GO:0006513,GO:0006605,GO:0006625,GO:0006629,GO:0006631,GO:0006635,GO:0006807,GO:0006810,GO:0006886,GO:0006996,GO:0007031,GO:0007275,GO:0008104,GO:0008150,GO:0008152,GO:0009056,GO:0009062,GO:0009790,GO:0009791,GO:0009793,GO:0009853,GO:0009987,GO:…	K13346	Peroxisome biogenesis factor 10 OS=Arabidopsis thaliana OX=3702 GN=PEX10 PE=1 SV=1
Sb01g27140	18.5718	7.65427	-1.27877	6.66542e-05	0.014482	GO:0001666,GO:0003674,GO:0003824,GO:0004177,GO:0005488,GO:0005575,GO:0005622,GO:0005623,GO:0005737,GO:0005829,GO:0005886,GO:0006508,GO:0006518,GO:0006807,GO:0006810,GO:0006950,GO:0008144,GO:0008150,GO:0008152,GO:0008233,GO:0008235,GO:0008237,GO:0008238,GO:0008270,GO:0009056,GO:0009628,GO:0009914,GO:0009926,GO:0009987,GO:0010013,GO:0010817,GO:0016020,GO:0016787,GO:0019538,GO:0031090,GO:0031406,GO:…	K08776	Aminopeptidase M1 OS=Arabidopsis thaliana OX=3702 GN=APM1 PE=1 SV=1
Sb01g27780	0.160177	13.2076	6.36556	0.000753078	0.0391439	NOT SIGIFICANT	NOT SIGIFICANT	NOT SIGIFICANT
Sb01g27880	0.130199	0.783948	2.59004	0.000403372	0.0302209	NOT SIGIFICANT	NOT SIGIFICANT	Amino-acid permease BAT1 homolog OS=Oryza sativa subsp. japonica OX=39947 GN=BAT1 PE=2 SV=1
Sb01g28070	2.55818	13.8806	2.43988	6.94298e-05	0.0145048	GO:0000139,GO:0001881,GO:0003674,GO:0005488,GO:0005575,GO:0005622,GO:0005623,GO:0005737,GO:0005768,GO:0005770,GO:0005771,GO:0005794,GO:0005802,GO:0006605,GO:0006623,GO:0006810,GO:0006886,GO:0007034,GO:0008104,GO:0008150,GO:0008152,GO:0008270,GO:0009987,GO:0010008,GO:0012505,GO:0015031,GO:0015833,GO:0016020,GO:0016192,GO:0016197,GO:0016482,GO:0023051,GO:0030904,GO:0031090,GO:0031410,GO:0031902,GO:…	K18467	Vacuolar protein sorting-associated protein 29 OS=Arabidopsis thaliana OX=3702 GN=VPS29 PE=2 SV=1
Sb01g28190	21.9071	7.4951	-1.54738	0.000402712	0.0302759	NOT SIGIFICANT	NOT SIGIFICANT	Histone deacetylase HDT1 OS=Glycine max OX=3847 GN=HDT1 PE=2 SV=1	组蛋白去乙酰化酶，参与维管组织发育
Sb01g29580	6.49733	20.7171	1.67291	0.000808724	0.0398439	GO:0001775,GO:0003674,GO:0003824,GO:0004143,GO:0005575,GO:0005622,GO:0005623,GO:0005634,GO:0005654,GO:0005737,GO:0005886,GO:0006629,GO:0006793,GO:0006796,GO:0006950,GO:0007596,GO:0007599,GO:0008150,GO:0008152,GO:0009507,GO:0009536,GO:0009611,GO:0009987,GO:0016020,GO:0016301,GO:0016310,GO:0016740,GO:0016772,GO:0016773,GO:0030168,GO:0030258,GO:0030425,GO:0031974,GO:0031981,GO:0032501,GO:0032991,GO:…	K00901	Diacylglycerol kinase 5 OS=Arabidopsis thaliana OX=3702 GN=DGK5 PE=2 SV=1
Sb01g30450	6.39282	16.1441	1.33648	0.00151597	0.0499811	NOT SIGIFICANT	NOT SIGIFICANT	Myosin-binding protein 2 OS=Arabidopsis thaliana OX=3702 GN=MYOB2 PE=1 SV=1
Sb01g30700	15.1935	30.8135	1.0201	5.08074e-05	0.012987	GO:0000003,GO:0000578,GO:0000902,GO:0000904,GO:0003006,GO:0003674,GO:0005215,GO:0005575,GO:0005622,GO:0005623,GO:0005737,GO:0005783,GO:0005886,GO:0005911,GO:0006810,GO:0007275,GO:0007389,GO:0008150,GO:0009314,GO:0009416,GO:0009506,GO:0009605,GO:0009606,GO:0009628,GO:0009629,GO:0009630,GO:0009653,GO:0009790,GO:0009791,GO:0009793,GO:0009798,GO:0009880,GO:0009888,GO:0009914,GO:0009921,GO:0009926,GO:…	K13947	Auxin efflux carrier component 3 OS=Arabidopsis thaliana OX=3702 GN=PIN3 PE=1 SV=1	生长素转运复合体3
Sb01g30800	0.293678	0.655849	1.15913	0.00139545	0.0489015	GO:0000285,GO:0000322,GO:0000323,GO:0000324,GO:0000329,GO:0003674,GO:0003824,GO:0005488,GO:0005543,GO:0005575,GO:0005622,GO:0005623,GO:0005737,GO:0005768,GO:0005773,GO:0005774,GO:0005942,GO:0006629,GO:0006644,GO:0006650,GO:0006793,GO:0006796,GO:0006810,GO:0008150,GO:0008152,GO:0008289,GO:0009987,GO:0010008,GO:0010118,GO:0012505,GO:0016020,GO:0016192,GO:0016197,GO:0016301,GO:0016307,GO:0016310,GO:…	K00921	Putative 1-phosphatidylinositol-3-phosphate 5-kinase FAB1C OS=Arabidopsis thaliana OX=3702 GN=FAB1C PE=2 SV=1
Sb01g32310	1.1534	4.17655	1.85642	0.000328852	0.028241	GO:0003674,GO:0003824,GO:0006725,GO:0008150,GO:0008152,GO:0009056,GO:0009058,GO:0009698,GO:0009699,GO:0009717,GO:0009987,GO:0016787,GO:0016788,GO:0016829,GO:0016835,GO:0016836,GO:0018130,GO:0019438,GO:0019748,GO:0033987,GO:0044237,GO:0044249,GO:0044550,GO:0046287,GO:0046483,GO:0052689,GO:0071704,GO:1901360,GO:1901362,GO:1901576	K13258	2-hydroxyisoflavanone dehydratase OS=Glycyrrhiza echinata OX=46348 GN=HIDM PE=1 SV=1	异黄酮合成酶之一
Sb01g32490	6.83423	1.45961	-2.2272	0.000786513	0.0398335	NOT SIGIFICANT	NOT SIGIFICANT	Mavicyanin OS=Cucurbita pepo OX=3663 PE=1 SV=1	植物花青素
Sb01g32510	0.00927943	0.712466	6.26264	0.00112896	0.0456776	NOT SIGIFICANT	K03236	Eukaryotic translation initiation factor 1A OS=Onobrychis viciifolia OX=3882 PE=2 SV=2
Sb01g32920	41.2894	10.5772	-1.96482	1.48306e-05	0.0107408	NOT SIGIFICANT	NOT SIGIFICANT	Acyl-coenzyme A thioesterase MBLAC2 OS=Mus musculus OX=10090 GN=Mblac2 PE=1 SV=2
Sb01g33270	3.20564	0.00981029	-8.3521	0.00144118	0.0495452	NOT SIGIFICANT	NOT SIGIFICANT	NOT SIGIFICANT
Sb01g33900	1.4875	0.143596	-3.3728	0.000859635	0.0408694	GO:0000075,GO:0000278,GO:0000775,GO:0000776,GO:0005575,GO:0005622,GO:0005623,GO:0005634,GO:0005635,GO:0005694,GO:0005737,GO:0005819,GO:0005828,GO:0005856,GO:0005874,GO:0005876,GO:0007049,GO:0007088,GO:0007093,GO:0007094,GO:0007346,GO:0008150,GO:0009987,GO:0010369,GO:0010564,GO:0010639,GO:0010948,GO:0010965,GO:0012505,GO:0015630,GO:0022402,GO:0030071,GO:0031577,GO:0031967,GO:0031975,GO:0032991,GO:…	K02537	Mitotic spindle checkpoint protein MAD2 OS=Arabidopsis thaliana OX=3702 GN=MAD2 PE=1 SV=1
Sb01g34690	66.464	14.5893	-2.18766	0.00088753	0.0409413	GO:0000122,GO:0000976,GO:0000977,GO:0000978,GO:0000987,GO:0001012,GO:0001067,GO:0003674,GO:0003676,GO:0003677,GO:0003690,GO:0003700,GO:0005488,GO:0005575,GO:0005622,GO:0005623,GO:0005634,GO:0006355,GO:0006357,GO:0006950,GO:0007275,GO:0008150,GO:0009653,GO:0009791,GO:0009888,GO:0009889,GO:0009890,GO:0009892,GO:0009987,GO:0010015,GO:0010053,GO:0010055,GO:0010468,GO:0010556,GO:0010558,GO:0010605,GO:…	NOT SIGIFICANT	Probable WRKY transcription factor 75 OS=Arabidopsis thaliana OX=3702 GN=WRKY75 PE=1 SV=1	磷胁迫相关转录因子
Sb01g34820	0.972698	6.28673	2.69225	2.98831e-06	0.00499439	NOT SIGIFICANT	K18730	Protein ESSENTIAL FOR POTEXVIRUS ACCUMULATION 1 OS=Arabidopsis thaliana OX=3702 GN=EXA1 PE=1 SV=1	抗病毒基因
Sb01g35300	16.5824	6.26604	-1.40403	6.22596e-05	0.0139455	GO:0000966,GO:0001682,GO:0003674,GO:0003824,GO:0004518,GO:0004519,GO:0004521,GO:0004526,GO:0004540,GO:0004549,GO:0005575,GO:0005622,GO:0005623,GO:0005737,GO:0005739,GO:0006139,GO:0006396,GO:0006399,GO:0006725,GO:0006807,GO:0008033,GO:0008150,GO:0008152,GO:0009507,GO:0009536,GO:0009987,GO:0010467,GO:0016070,GO:0016787,GO:0016788,GO:0016891,GO:0016893,GO:0034470,GO:0034471,GO:0034641,GO:0034660,GO:…	K18213	Proteinaceous RNase P 1, chloroplastic/mitochondrial OS=Arabidopsis thaliana OX=3702 GN=PRORP1 PE=1 SV=1
Sb01g36480	24.3286	116.228	2.25623	0.000407461	0.0303181	NOT SIGIFICANT	NOT SIGIFICANT	NOT SIGIFICANT
Sb01g37470	12.5279	6.17683	-1.0202	0.000431859	0.0311728	GO:0005575,GO:0005622,GO:0005623,GO:0005634,GO:0005737,GO:0005829,GO:0006508,GO:0006511,GO:0006807,GO:0008150,GO:0008152,GO:0009056,GO:0009057,GO:0009987,GO:0010498,GO:0019538,GO:0019941,GO:0030163,GO:0032991,GO:0034657,GO:0043161,GO:0043170,GO:0043226,GO:0043227,GO:0043229,GO:0043231,GO:0043632,GO:0044237,GO:0044238,GO:0044248,GO:0044257,GO:0044260,GO:0044265,GO:0044267,GO:0044424,GO:0044444,GO:…	K14399	Protein MAEA homolog OS=Arabidopsis thaliana OX=3702 GN=MAEA PE=1 SV=1	泛素酶E3
Sb01g38140	0.00939415	12.3897	10.3651	0.00029007	0.0270487	NOT SIGIFICANT	NOT SIGIFICANT	NOT SIGIFICANT
Sb01g38670	2.30793	5.10607	1.14561	0.000211661	0.0245923	NOT SIGIFICANT	K04733	G-type lectin S-receptor-like serine/threonine-protein kinase At1g11330 OS=Arabidopsis thaliana OX=3702 GN=At1g11330 PE=1 SV=3	RDA2，正调控抗病
Sb01g41310	1.66987	4.95593	1.56942	0.000519938	0.0337215	NOT SIGIFICANT	NOT SIGIFICANT	Cytochrome P450 82A4 OS=Glycine max OX=3847 GN=CYP82A4 PE=2 SV=1	细胞色素
Sb01g42270	32.5444	13.5193	-1.26739	0.00136592	0.0489727	NOT SIGIFICANT	K09391	E2F transcription factor-like E2FF OS=Arabidopsis thaliana OX=3702 GN=E2FF PE=2 SV=1
Sb01g42870	191.015	64.4452	-1.56754	3.89918e-05	0.0117663	GO:0005575,GO:0005622,GO:0005623,GO:0005856,GO:0043226,GO:0043228,GO:0043229,GO:0043232,GO:0044424,GO:0044464	K07374	Tubulin alpha chain OS=Prunus dulcis OX=3755 GN=TUBA PE=2 SV=1
Sb01g43150	16.7121	0.931147	-4.16574	0.000269267	0.0262348	GO:0003674,GO:0005488,GO:0005509,GO:0005575,GO:0005622,GO:0005623,GO:0005737,GO:0005739,GO:0043167,GO:0043169,GO:0043226,GO:0043227,GO:0043229,GO:0043231,GO:0044424,GO:0044444,GO:0044464,GO:0046872	K02183	Probable calcium-binding protein CML46 OS=Arabidopsis thaliana OX=3702 GN=CML46 PE=1 SV=1	负调控植物免疫的钙调素蛋白
Sb01g43880	0.161521	0.00984168	-4.03668	0.000671313	0.0383832	GO:0000003,GO:0003006,GO:0003674,GO:0003676,GO:0003723,GO:0003729,GO:0005488,GO:0005575,GO:0005622,GO:0005623,GO:0005811,GO:0006950,GO:0007275,GO:0008150,GO:0009266,GO:0009409,GO:0009628,GO:0009791,GO:0009845,GO:0010154,GO:0010344,GO:0010876,GO:0012511,GO:0016020,GO:0019915,GO:0022414,GO:0032501,GO:0032502,GO:0033036,GO:0043226,GO:0043228,GO:0043229,GO:0043232,GO:0044085,GO:0044424,GO:0044464,GO:…	NOT SIGIFICANT	Oleosin H1 OS=Sesamum indicum OX=4182 PE=1 SV=1
Sb01g45190	0.489709	1.47217	1.58795	0.000860775	0.0407452	NOT SIGIFICANT	K08286	Protein kinase PVPK-1 OS=Phaseolus vulgaris OX=3885 PE=2 SV=1
Sb01g45210	1.83234	0.85627	-1.09755	0.00102794	0.0437922	GO:0005575,GO:0005622,GO:0005623,GO:0005634,GO:0005635,GO:0005737,GO:0005783,GO:0012505,GO:0031967,GO:0031975,GO:0043226,GO:0043227,GO:0043229,GO:0043231,GO:0044422,GO:0044424,GO:0044428,GO:0044444,GO:0044446,GO:0044464	K14314	Nuclear pore complex protein GP210 OS=Arabidopsis thaliana OX=3702 GN=GB210 PE=1 SV=1
Sb01g46060	6.24087	2.65736	-1.23175	0.00146129	0.0495311	NOT SIGIFICANT	NOT SIGIFICANT	Pentatricopeptide repeat-containing protein At2g13600 OS=Arabidopsis thaliana OX=3702 GN=PCMP-E76 PE=3 SV=1
Sb01g46330	124.695	55.3207	-1.17251	0.00067194	0.0382179	GO:0001666,GO:0003674,GO:0003824,GO:0004021,GO:0005575,GO:0005576,GO:0005622,GO:0005623,GO:0005737,GO:0005773,GO:0005777,GO:0006950,GO:0008150,GO:0008152,GO:0008453,GO:0008483,GO:0009507,GO:0009532,GO:0009536,GO:0009570,GO:0009628,GO:0009853,GO:0009987,GO:0016020,GO:0016740,GO:0016769,GO:0036293,GO:0042579,GO:0043094,GO:0043226,GO:0043227,GO:0043229,GO:0043231,GO:0044237,GO:0044422,GO:0044424,GO:…	K14272	Glutamate--glyoxylate aminotransferase 2 OS=Arabidopsis thaliana OX=3702 GN=GGAT2 PE=1 SV=1
Sb01g47060	0.00922632	15.6024	10.7237	0.00114912	0.0461495	NOT SIGIFICANT	NOT SIGIFICANT	Probable arabinosyltransferase ARAD1 OS=Arabidopsis thaliana OX=3702 GN=ARAD1 PE=1 SV=1	果胶合成酶
Sb01g47120	0.0106494	5.30911	8.96155	0.000180083	0.022748	GO:0003674,GO:0003676,GO:0003723,GO:0003729,GO:0005488,GO:0097159,GO:1901363	NOT SIGIFICANT	RanBP2-type zinc finger protein At1g67325 OS=Arabidopsis thaliana OX=3702 GN=At1g67325 PE=1 SV=1
Sb01g47660	0.0103782	0.968014	6.5434	0.000606357	0.0361932	NOT SIGIFICANT	NOT SIGIFICANT	NOT SIGIFICANT
Sb01g48590	54.3092	21.1785	-1.3586	0.00091996	0.0416416	GO:0003674,GO:0005215,GO:0005575,GO:0005622,GO:0005623,GO:0005737,GO:0005783,GO:0006605,GO:0006612,GO:0006620,GO:0006810,GO:0006886,GO:0008104,GO:0008150,GO:0008320,GO:0008565,GO:0012505,GO:0015031,GO:0015399,GO:0015405,GO:0015450,GO:0015833,GO:0022804,GO:0022857,GO:0022884,GO:0031204,GO:0033036,GO:0033365,GO:0034613,GO:0042886,GO:0042887,GO:0043226,GO:0043227,GO:0043229,GO:0043231,GO:0044424,GO:…	K10956	Protein transport protein Sec61 subunit alpha OS=Dictyostelium discoideum OX=44689 GN=sec61a PE=3 SV=1
Sb01g48610	0.141218	7.69394	5.76773	0.000457504	0.0318596	GO:0005575,GO:0005622,GO:0005623,GO:0005737,GO:0009507,GO:0009534,GO:0009535,GO:0009536,GO:0009543,GO:0009579,GO:0016020,GO:0031976,GO:0031977,GO:0031978,GO:0031984,GO:0034357,GO:0042651,GO:0043226,GO:0043227,GO:0043229,GO:0043231,GO:0044422,GO:0044424,GO:0044434,GO:0044435,GO:0044436,GO:0044444,GO:0044446,GO:0044464,GO:0055035	NOT SIGIFICANT	Thylakoid lumenal 15 kDa protein 1, chloroplastic OS=Arabidopsis thaliana OX=3702 GN=At2g44920 PE=1 SV=2
Sb01g48830	65.9227	1.07236	-5.94191	5.75284e-05	0.013157	NOT SIGIFICANT	K01803	Triosephosphate isomerase, cytosolic OS=Petunia hybrida OX=4102 GN=TPIP1 PE=2 SV=1
Sb01g48840	3.71644	13.4487	1.85548	0.000329251	0.0281639	NOT SIGIFICANT	NOT SIGIFICANT	NOT SIGIFICANT
Sb01g49560	2.54225	0.604924	-2.07128	0.000362389	0.0291616	GO:0000270,GO:0000323,GO:0003674,GO:0003824,GO:0004553,GO:0004563,GO:0005575,GO:0005576,GO:0005615,GO:0005622,GO:0005623,GO:0005737,GO:0005764,GO:0005773,GO:0005975,GO:0006022,GO:0006026,GO:0006027,GO:0006464,GO:0006491,GO:0006517,GO:0006807,GO:0008150,GO:0008152,GO:0009056,GO:0009057,GO:0009100,GO:0009253,GO:0009605,GO:0009607,GO:0009617,GO:0009987,GO:0015929,GO:0016052,GO:0016231,GO:0016787,GO:…	K01227	Cytosolic endo-beta-N-acetylglucosaminidase 1 OS=Arabidopsis thaliana OX=3702 GN=ENGASE1 PE=1 SV=1
Sb01g49860	2.78553	1.33992	-1.0558	0.000166246	0.022435	GO:0005575,GO:0005622,GO:0005623,GO:0005737,GO:0009507,GO:0009526,GO:0009534,GO:0009535,GO:0009536,GO:0009579,GO:0009941,GO:0016020,GO:0031967,GO:0031975,GO:0031976,GO:0031984,GO:0034357,GO:0042651,GO:0043226,GO:0043227,GO:0043229,GO:0043231,GO:0044422,GO:0044424,GO:0044434,GO:0044435,GO:0044436,GO:0044444,GO:0044446,GO:0044464,GO:0055035	NOT SIGIFICANT	Rhodanese-like domain-containing protein 14, chloroplastic OS=Arabidopsis thaliana OX=3702 GN=At4g27700 PE=2 SV=1
Sb01g49940	0.649969	1.77363	1.44826	0.0014567	0.0496076	NOT SIGIFICANT	NOT SIGIFICANT	NOT SIGIFICANT
Sb01g50420	0.0103461	13.6706	10.3678	0.000759243	0.0391831	NOT SIGIFICANT	NOT SIGIFICANT	NOT SIGIFICANT
Sb01g56811	71.0918	160.892	1.17833	6.55175e-05	0.000119672	NOT SIGIFICANT	K12938	Baicalein 7-O-glucuronosyltransferase OS=Scutellaria baicalensis OX=65409 GN=UBGAT-I PE=1 SV=1	黄芩素7-O-葡糖醛酸转移酶，是合成黄芩苷的酶
Sb01g51040	63.253	14.9456	-2.08141	0.000210254	0.0245602	GO:0003674,GO:0003824,GO:0005575,GO:0005622,GO:0005623,GO:0005634,GO:0005737,GO:0005886,GO:0005911,GO:0006725,GO:0008150,GO:0008152,GO:0008168,GO:0008171,GO:0008757,GO:0009058,GO:0009506,GO:0009698,GO:0009699,GO:0009808,GO:0009809,GO:0009812,GO:0009813,GO:0009987,GO:0016020,GO:0016740,GO:0016741,GO:0019438,GO:0019748,GO:0030054,GO:0030744,GO:0030755,GO:0032259,GO:0033799,GO:0042440,GO:0043226,GO:…	K13066	Caffeic acid 3-O-methyltransferase 1 OS=Ocimum basilicum OX=39350 GN=COMT1 PE=2 SV=1	咖啡酸3-0-甲基转移酶
Sb01g52680	13.0318	3.54717	-1.87729	0.00111102	0.0455457	GO:0003674,GO:0003824,GO:0004743,GO:0005575,GO:0005622,GO:0005623,GO:0005737,GO:0005975,GO:0006082,GO:0006090,GO:0006091,GO:0006096,GO:0006139,GO:0006163,GO:0006164,GO:0006165,GO:0006725,GO:0006732,GO:0006733,GO:0006753,GO:0006754,GO:0006757,GO:0006793,GO:0006796,GO:0006807,GO:0008150,GO:0008152,GO:0009056,GO:0009058,GO:0009108,GO:0009117,GO:0009123,GO:0009124,GO:0009126,GO:0009127,GO:0009132,GO:…	K00873	Plastidial pyruvate kinase 4, chloroplastic OS=Arabidopsis thaliana OX=3702 GN=PKP4 PE=2 SV=1
Sb01g53910	7.06112	2.45031	-1.52693	0.000534612	0.0339635	NOT SIGIFICANT	NOT SIGIFICANT	LEAF RUST 10 DISEASE-RESISTANCE LOCUS RECEPTOR-LIKE PROTEIN KINASE-like 2.1 OS=Arabidopsis thaliana OX=3702 GN=LRK10L-2.1 PE=3 SV=1
Sb01g56590	7.20318	15.4042	1.09662	0.00079881	0.039625	GO:0006629,GO:0006720,GO:0006721,GO:0008150,GO:0008152,GO:0008299,GO:0008610,GO:0009058,GO:0009987,GO:0016108,GO:0016109,GO:0016114,GO:0016116,GO:0016117,GO:0016122,GO:0016123,GO:0042440,GO:0044237,GO:0044238,GO:0044249,GO:0044255,GO:0046148,GO:0071704,GO:1901576	K15746	Beta-carotene hydroxylase 2, chloroplastic OS=Capsicum annuum OX=4072 GN=CA2 PE=1 SV=2
Sb01g57290	275.483	53.5178	-2.36387	0.000820965	0.0401736	NOT SIGIFICANT	NOT SIGIFICANT	NOT SIGIFICANT
Sb01g57300	275.483	53.5178	-2.36387	0.000820965	0.0401736	NOT SIGIFICANT	NOT SIGIFICANT	NOT SIGIFICANT
Sb01g57310	275.483	53.5178	-2.36387	0.000820965	0.0401736	NOT SIGIFICANT	NOT SIGIFICANT	NOT SIGIFICANT
Sb01g58470	57.5954	22.4109	-1.36175	2.25478e-05	0.0104233	GO:0000166,GO:0003674,GO:0003824,GO:0004017,GO:0005488,GO:0005524,GO:0006139,GO:0006163,GO:0006725,GO:0006753,GO:0006793,GO:0006796,GO:0006807,GO:0008144,GO:0008150,GO:0008152,GO:0009058,GO:0009117,GO:0009123,GO:0009165,GO:0009987,GO:0016301,GO:0016310,GO:0016740,GO:0016772,GO:0016776,GO:0017076,GO:0018130,GO:0019205,GO:0019438,GO:0019637,GO:0030554,GO:0032553,GO:0032555,GO:0032559,GO:0034641,GO:…	K00939	Adenylate kinase 4 OS=Oryza sativa subsp. japonica OX=39947 GN=ADK-B PE=2 SV=1
Sb01g58960	4.63514	0.497527	-3.21977	6.82466e-05	0.0145372	GO:0005575,GO:0005622,GO:0005623,GO:0005737,GO:0009507,GO:0009534,GO:0009535,GO:0009536,GO:0009579,GO:0016020,GO:0031976,GO:0031984,GO:0034357,GO:0042651,GO:0043226,GO:0043227,GO:0043229,GO:0043231,GO:0044422,GO:0044424,GO:0044434,GO:0044435,GO:0044436,GO:0044444,GO:0044446,GO:0044464,GO:0055035	NOT SIGIFICANT	Protein FLUORESCENT IN BLUE LIGHT, chloroplastic OS=Arabidopsis thaliana OX=3702 GN=FLU PE=1 SV=1
Sb01g59530	0.00914395	0.911753	6.63968	0.000351885	0.0287421	GO:0003674,GO:0003824,GO:0005575,GO:0005622,GO:0005623,GO:0005737,GO:0005773,GO:0005783,GO:0006629,GO:0006638,GO:0006639,GO:0006641,GO:0008080,GO:0008150,GO:0008152,GO:0008610,GO:0009058,GO:0009987,GO:0012505,GO:0016407,GO:0016410,GO:0016740,GO:0016746,GO:0016747,GO:0019432,GO:0043226,GO:0043227,GO:0043229,GO:0043231,GO:0044237,GO:0044238,GO:0044249,GO:0044255,GO:0044424,GO:0044444,GO:0044464,GO:…	K00679	Phospholipid:diacylglycerol acyltransferase 1 OS=Arabidopsis thaliana OX=3702 GN=PDAT1 PE=2 SV=1
Sb01g59540	0.0103496	1.06429	6.68417	0.000445137	0.0316062	GO:0003674,GO:0003676,GO:0003723,GO:0003729,GO:0005488,GO:0005575,GO:0005622,GO:0005623,GO:0005737,GO:0006996,GO:0008150,GO:0009987,GO:0010494,GO:0010603,GO:0016043,GO:0022607,GO:0022613,GO:0022618,GO:0032991,GO:0033043,GO:0034063,GO:0034622,GO:0035770,GO:0036464,GO:0043226,GO:0043228,GO:0043229,GO:0043232,GO:0043254,GO:0043933,GO:0044085,GO:0044087,GO:0044424,GO:0044444,GO:0044464,GO:0050789,GO:…	NOT SIGIFICANT	Polyadenylate-binding protein-interacting protein 4 OS=Arabidopsis thaliana OX=3702 GN=CID4 PE=2 SV=1
Sb01g59830	1.58219	5.69794	1.84852	0.000662008	0.0381524	NOT SIGIFICANT	K03787	5'-nucleotidase SurE OS=Campylobacter jejuni subsp. jejuni serotype O:23/36 (strain 81-176) OX=354242 GN=surE PE=3 SV=1
Sb01g60120	0.0350788	0.305026	3.12026	0.00013983	0.0208088	GO:0000003,GO:0003006,GO:0003674,GO:0003824,GO:0004497,GO:0006629,GO:0006694,GO:0007275,GO:0008150,GO:0008152,GO:0008202,GO:0008610,GO:0009058,GO:0009791,GO:0009908,GO:0010268,GO:0010817,GO:0016125,GO:0016128,GO:0016129,GO:0016131,GO:0016132,GO:0016491,GO:0016705,GO:0016709,GO:0022414,GO:0032501,GO:0032502,GO:0042445,GO:0042446,GO:0042592,GO:0044238,GO:0048366,GO:0048367,GO:0048437,GO:0048438,GO:…	K09589	3-epi-6-deoxocathasterone 23-monooxygenase CYP90D1 OS=Arabidopsis thaliana OX=3702 GN=CYP90D1 PE=1 SV=1
Sb01g60760	8.44951	24.92	1.56036	0.000895932	0.0410673	NOT SIGIFICANT	NOT SIGIFICANT	Clavaminate synthase-like protein At3g21360 OS=Arabidopsis thaliana OX=3702 GN=At3g21360 PE=1 SV=1
Sb01g61910	1.08392	0.0109695	-6.62661	0.000149096	0.021453	NOT SIGIFICANT	NOT SIGIFICANT	Deoxypodophyllotoxin synthase OS=Sinopodophyllum hexandrum OX=93608 GN=2-ODD PE=1 SV=1
Sb01g62030	211.546	70.3881	-1.58757	0.000837392	0.0406117	GO:0000295,GO:0003674,GO:0005215,GO:0005346,GO:0005347,GO:0005471,GO:0005575,GO:0005622,GO:0005623,GO:0005737,GO:0006810,GO:0006811,GO:0006820,GO:0006855,GO:0006862,GO:0008150,GO:0008509,GO:0008514,GO:0009507,GO:0009526,GO:0009536,GO:0009941,GO:0015075,GO:0015215,GO:0015216,GO:0015217,GO:0015238,GO:0015291,GO:0015297,GO:0015301,GO:0015605,GO:0015711,GO:0015748,GO:0015865,GO:0015866,GO:0015867,GO:…	K03301	Plastidic ATP/ADP-transporter OS=Solanum tuberosum OX=4113 PE=2 SV=2
Sb01g62120	5.96003	0.900545	-2.72645	0.000758932	0.0392603	GO:0003674,GO:0003824,GO:0003913,GO:0003914,GO:0008150,GO:0009314,GO:0009411,GO:0009416,GO:0009628,GO:0016829,GO:0016830,GO:0050896,GO:0140097	K02295	(6-4)DNA photolyase OS=Arabidopsis thaliana OX=3702 GN=UVR3 PE=1 SV=2
Sb01g62650	11.0123	2.07782	-2.40597	0.00123424	0.0469638	NOT SIGIFICANT	NOT SIGIFICANT	Protein POST-ILLUMINATION CHLOROPHYLL FLUORESCENCE INCREASE, chloroplastic OS=Arabidopsis thaliana OX=3702 GN=PIFI PE=2 SV=1
Sb01g63590	18.3094	49.5266	1.43562	0.00121259	0.0466301	GO:0003674,GO:0003824,GO:0004611,GO:0005575,GO:0005622,GO:0005623,GO:0005737,GO:0005829,GO:0006082,GO:0006091,GO:0006099,GO:0006101,GO:0008150,GO:0008152,GO:0008964,GO:0009060,GO:0009987,GO:0015980,GO:0016829,GO:0016830,GO:0016831,GO:0016999,GO:0017144,GO:0019752,GO:0043436,GO:0044237,GO:0044238,GO:0044281,GO:0044424,GO:0044444,GO:0044464,GO:0045333,GO:0055114,GO:0071704,GO:0072350	K01595	Phosphoenolpyruvate carboxylase 4 OS=Arabidopsis thaliana OX=3702 GN=PPC4 PE=2 SV=1
Sb01g63940	15.2894	0.00993911	-10.5871	9.33922e-05	0.017343	NOT SIGIFICANT	NOT SIGIFICANT	NOT SIGIFICANT
Sb01g65010	1.95154	10.1856	2.38384	5.74548e-05	0.01328	NOT SIGIFICANT	NOT SIGIFICANT	NOT SIGIFICANT
Sb01g67300	1.03219	0.138795	-2.89468	0.000844869	0.0407921	GO:0001101,GO:0003674,GO:0003824,GO:0004842,GO:0005575,GO:0005622,GO:0005623,GO:0005737,GO:0005829,GO:0006464,GO:0006807,GO:0006950,GO:0008150,GO:0008152,GO:0009414,GO:0009415,GO:0009628,GO:0009987,GO:0010033,GO:0010035,GO:0010200,GO:0010243,GO:0016567,GO:0016740,GO:0019538,GO:0019787,GO:0032446,GO:0036211,GO:0042221,GO:0042493,GO:0043170,GO:0043412,GO:0044237,GO:0044238,GO:0044260,GO:0044267,GO:…	NOT SIGIFICANT	E3 ubiquitin-protein ligase PUB22 OS=Arabidopsis thaliana OX=3702 GN=PUB22 PE=1 SV=1
Sb01g67830	3.8622	0.0356567	-6.75911	1.52011e-05	0.010654	NOT SIGIFICANT	K09422	Transcription factor RAX3 OS=Arabidopsis thaliana OX=3702 GN=RAX3 PE=2 SV=1
Sb01g68670	16.5895	33.4251	1.01066	0.00123786	0.047019	NOT SIGIFICANT	NOT SIGIFICANT	MTOR-associated protein MEAK7 OS=Danio rerio OX=7955 GN=meak7 PE=2 SV=1
Sb01g69460	6.20712	0.00953135	-9.34703	1.0622e-06	0.00288479	GO:0000209,GO:0003674,GO:0003824,GO:0004842,GO:0005575,GO:0005623,GO:0005886,GO:0006464,GO:0006508,GO:0006511,GO:0006807,GO:0007275,GO:0008150,GO:0008152,GO:0009056,GO:0009057,GO:0009553,GO:0009555,GO:0009561,GO:0009987,GO:0010498,GO:0016020,GO:0016567,GO:0016740,GO:0019538,GO:0019787,GO:0019941,GO:0030163,GO:0032446,GO:0032501,GO:0032502,GO:0036211,GO:0043161,GO:0043170,GO:0043412,GO:0043632,GO:…	K19043	E3 ubiquitin-protein ligase RHF2A OS=Arabidopsis thaliana OX=3702 GN=RHF2A PE=2 SV=1
Sb01g69550	3.87557	0.00958101	-8.66001	0.000472097	0.0324597	GO:0005575,GO:0005576	NOT SIGIFICANT	Protein P21 OS=Glycine max OX=3847 PE=1 SV=1
Sb01g71130	6.4344	18.2829	1.50662	0.000680756	0.0382191	GO:0003674,GO:0003824,GO:0004385,GO:0005575,GO:0005622,GO:0005623,GO:0005737,GO:0005829,GO:0006139,GO:0006163,GO:0006164,GO:0006185,GO:0006725,GO:0006753,GO:0006793,GO:0006796,GO:0006807,GO:0006810,GO:0007275,GO:0008104,GO:0008150,GO:0008152,GO:0009058,GO:0009116,GO:0009117,GO:0009119,GO:0009123,GO:0009126,GO:0009132,GO:0009133,GO:0009135,GO:0009136,GO:0009141,GO:0009144,GO:0009150,GO:0009151,GO:…	K00942	Guanylate kinase 2 OS=Arabidopsis thaliana OX=3702 GN=GK-2 PE=2 SV=1
Sb01g71260	22.4198	6.72641	-1.73686	0.000716584	0.0383478	GO:0000154,GO:0000495,GO:0001522,GO:0003674,GO:0003824,GO:0005575,GO:0005622,GO:0005623,GO:0005634,GO:0005730,GO:0005732,GO:0005737,GO:0005829,GO:0005911,GO:0006139,GO:0006364,GO:0006396,GO:0006725,GO:0006807,GO:0008150,GO:0008152,GO:0009451,GO:0009506,GO:0009982,GO:0009987,GO:0010467,GO:0016070,GO:0016071,GO:0016072,GO:0016073,GO:0016074,GO:0016556,GO:0016853,GO:0016866,GO:0022613,GO:0030054,GO:…	K11131	H/ACA ribonucleoprotein complex subunit 4 OS=Arabidopsis thaliana OX=3702 GN=CBF5 PE=1 SV=1
Sb01g72490	27.9505	10.6729	-1.38892	0.00101305	0.0439333	NOT SIGIFICANT	NOT SIGIFICANT	NOT SIGIFICANT
Sb01g72610	0.185162	0.00915158	-4.33863	0.000336499	0.0283376	GO:0003674,GO:0005215,GO:0005575,GO:0005623,GO:0005886,GO:0006810,GO:0008150,GO:0016020,GO:0022857,GO:0044464,GO:0051179,GO:0051234,GO:0055085,GO:0071944	NOT SIGIFICANT	WAT1-related protein At4g30420 OS=Arabidopsis thaliana OX=3702 GN=At4g30420 PE=3 SV=1
Sb02g00030	30.5684	0.477016	-6.00186	1.60568e-05	0.00969072	NOT SIGIFICANT	NOT SIGIFICANT	NOT SIGIFICANT
Sb02g00120	21.1183	65.2768	1.62808	0.000735799	0.0388971	GO:0005575,GO:0005622,GO:0005623,GO:0005886,GO:0008150,GO:0010336,GO:0016020,GO:0031982,GO:0042592,GO:0043226,GO:0043227,GO:0043229,GO:0044424,GO:0044464,GO:0048878,GO:0050801,GO:0055081,GO:0055088,GO:0065007,GO:0065008,GO:0071944,GO:0097708	K14638	Protein NRT1/ PTR FAMILY 3.1 OS=Arabidopsis thaliana OX=3702 GN=NPF3.1 PE=2 SV=1
Sb02g00620	26.1212	0.636188	-5.35963	0.000389896	0.0299338	GO:0003674,GO:0003700,GO:0006355,GO:0008150,GO:0009889,GO:0010468,GO:0010556,GO:0019219,GO:0019222,GO:0031323,GO:0031326,GO:0050789,GO:0050794,GO:0051171,GO:0051252,GO:0060255,GO:0065007,GO:0080090,GO:0140110,GO:1903506,GO:2000112,GO:2001141	NOT SIGIFICANT	NAC domain-containing protein 100 OS=Arabidopsis thaliana OX=3702 GN=NAC100 PE=2 SV=1
Sb02g00630	26.1212	0.636188	-5.35963	0.000389896	0.0299338	GO:0003674,GO:0003824,GO:0005215,GO:0005575,GO:0005622,GO:0005623,GO:0005737,GO:0005739,GO:0005740,GO:0005743,GO:0006810,GO:0006996,GO:0007005,GO:0008104,GO:0008150,GO:0008320,GO:0008565,GO:0009987,GO:0015031,GO:0015833,GO:0016020,GO:0016043,GO:0016462,GO:0016787,GO:0016817,GO:0016818,GO:0016887,GO:0017004,GO:0017062,GO:0017111,GO:0019866,GO:0022607,GO:0022857,GO:0022884,GO:0031090,GO:0031966,GO:…	K08900	AAA-ATPase At4g25835 OS=Arabidopsis thaliana OX=3702 GN=At4g25835 PE=2 SV=1
Sb02g03640	2.82365	6.00024	1.08746	0.000118251	0.0190314	GO:0005575,GO:0005623,GO:0005886,GO:0016020,GO:0044464,GO:0071944	K05658	Putative multidrug resistance protein OS=Oryza sativa subsp. japonica OX=39947 GN=Os02g0190300 PE=3 SV=1
Sb02g03840	0.776529	4.26331	2.45686	0.000331267	0.0282252	GO:0003674,GO:0003824,GO:0005575,GO:0005622,GO:0005623,GO:0005737,GO:0005783,GO:0008150,GO:0008152,GO:0012505,GO:0016491,GO:0016614,GO:0043226,GO:0043227,GO:0043229,GO:0043231,GO:0044424,GO:0044444,GO:0044464,GO:0045703,GO:0055114	K10251	Very-long-chain 3-oxoacyl-CoA reductase-like protein At1g24470 OS=Arabidopsis thaliana OX=3702 GN=KCR2 PE=2 SV=1
Sb02g03860	0.346406	6.46261	4.22158	5.27469e-05	0.0131728	NOT SIGIFICANT	K20478	Trans-Golgi network-localized SYP41-interacting protein 1 OS=Arabidopsis thaliana OX=3702 GN=TNO1 PE=1 SV=2
Sb02g04010	9.2147	1.93887	-2.24872	1.4062e-05	0.0105354	NOT SIGIFICANT	NOT SIGIFICANT	Leucine-rich repeat receptor-like serine/threonine-protein kinase At1g17230 OS=Arabidopsis thaliana OX=3702 GN=At1g17230 PE=1 SV=2
Sb02g04110	0.972056	0.469652	-1.04945	0.00143002	0.0494746	NOT SIGIFICANT	NOT SIGIFICANT	Coiled-coil domain-containing protein SCD2 OS=Arabidopsis thaliana OX=3702 GN=SCD2 PE=1 SV=1
Sb02g04740	12.1032	3.59497	-1.75133	0.000295562	0.0270956	NOT SIGIFICANT	NOT SIGIFICANT	Remorin 4.2 OS=Arabidopsis thaliana OX=3702 GN=REM4.2 PE=1 SV=1
Sb02g06140	17.1241	36.7131	1.10027	0.000242516	0.0246222	NOT SIGIFICANT	NOT SIGIFICANT	NOT SIGIFICANT
Sb02g07240	19.158	9.55467	-1.00367	0.000307961	0.0276491	GO:0003674,GO:0003824,GO:0004553,GO:0004650,GO:0005575,GO:0005618,GO:0005623,GO:0008150,GO:0009664,GO:0009825,GO:0009827,GO:0009831,GO:0009987,GO:0016043,GO:0016049,GO:0016787,GO:0016798,GO:0030312,GO:0040007,GO:0042545,GO:0042547,GO:0044464,GO:0045229,GO:0071554,GO:0071555,GO:0071669,GO:0071840,GO:0071944	K01213	Polygalacturonase At1g48100 OS=Arabidopsis thaliana OX=3702 GN=At1g48100 PE=2 SV=1	果胶降解酶
Sb02g08080	2.2007	0.63282	-1.79809	0.00106685	0.0447479	GO:0005575,GO:0005622,GO:0005623,GO:0005634,GO:0005737,GO:0005739,GO:0005829,GO:0006508,GO:0006511,GO:0006515,GO:0006807,GO:0006950,GO:0008150,GO:0008152,GO:0009056,GO:0009057,GO:0009987,GO:0010033,GO:0010498,GO:0019538,GO:0019941,GO:0030163,GO:0033554,GO:0035966,GO:0035967,GO:0042221,GO:0043161,GO:0043170,GO:0043226,GO:0043227,GO:0043229,GO:0043231,GO:0043632,GO:0044237,GO:0044238,GO:0044248,GO:…	NOT SIGIFICANT	BAG family molecular chaperone regulator 3 OS=Arabidopsis thaliana OX=3702 GN=BAG3 PE=1 SV=1
Sb02g08750	0.0376515	1.23315	5.0335	0.000750294	0.0390927	NOT SIGIFICANT	NOT SIGIFICANT	Transmembrane protein 161B OS=Mus musculus OX=10090 GN=Tmem161b PE=2 SV=1
Sb02g09390	1.01776	10.5692	3.37641	5.46763e-05	0.0130544	GO:0005575,GO:0005622,GO:0005623,GO:0005737,GO:0005739,GO:0005740,GO:0005741,GO:0005743,GO:0006605,GO:0006626,GO:0006810,GO:0006839,GO:0006886,GO:0006996,GO:0007005,GO:0008104,GO:0008150,GO:0009536,GO:0009987,GO:0015031,GO:0015833,GO:0016020,GO:0016043,GO:0019866,GO:0019867,GO:0031090,GO:0031966,GO:0031967,GO:0031968,GO:0031975,GO:0033036,GO:0033365,GO:0034613,GO:0042886,GO:0043226,GO:0043227,GO:…	K17776	Mitochondrial outer membrane import complex protein METAXIN OS=Arabidopsis thaliana OX=3702 GN=MTX1 PE=1 SV=1
Sb02g09970	7.6709	2.95535	-1.37606	0.00117939	0.0463376	NOT SIGIFICANT	NOT SIGIFICANT	Protein RKD4 OS=Arabidopsis thaliana OX=3702 GN=RKD4 PE=3 SV=1
Sb02g10870	21.1523	3.41052	-2.63275	0.00142726	0.049458	GO:0000228,GO:0000375,GO:0000377,GO:0000390,GO:0000398,GO:0000781,GO:0000784,GO:0003674,GO:0005488,GO:0005575,GO:0005576,GO:0005622,GO:0005623,GO:0005634,GO:0005654,GO:0005681,GO:0005684,GO:0005694,GO:0005730,GO:0005737,GO:0006139,GO:0006396,GO:0006397,GO:0006725,GO:0006807,GO:0008150,GO:0008152,GO:0008380,GO:0009987,GO:0010467,GO:0016043,GO:0016070,GO:0016071,GO:0016604,GO:0016607,GO:0022411,GO:…	K13103	Septin and tuftelin-interacting protein 1 homolog 1 OS=Arabidopsis thaliana OX=3702 GN=STIPL1 PE=1 SV=1
Sb02g12770	1.42213	0.0109864	-7.01619	3.4727e-07	0.00251505	GO:0000003,GO:0000139,GO:0003006,GO:0003674,GO:0003824,GO:0004382,GO:0005575,GO:0005622,GO:0005623,GO:0005737,GO:0005794,GO:0006139,GO:0006152,GO:0006163,GO:0006195,GO:0006213,GO:0006220,GO:0006244,GO:0006256,GO:0006725,GO:0006753,GO:0006793,GO:0006796,GO:0006807,GO:0007275,GO:0007548,GO:0008150,GO:0008152,GO:0008406,GO:0009056,GO:0009058,GO:0009116,GO:0009117,GO:0009119,GO:0009123,GO:0009125,GO:…	K01510	Probable apyrase 7 OS=Arabidopsis thaliana OX=3702 GN=APY7 PE=2 SV=1
Sb02g12940	36.8567	15.6037	-1.24004	0.0012809	0.0480659	NOT SIGIFICANT	NOT SIGIFICANT	NOT SIGIFICANT
Sb08g10770	2.63449	5.77938	1.13339	0.00250986	0.00747829	GO:0000003,GO:0003006,GO:0005575,GO:0005622,GO:0005623,GO:0005634,GO:0007154,GO:0007165,GO:0007275,GO:0008150,GO:0009790,GO:0009791,GO:0009793,GO:0009888,GO:0009987,GO:0010065,GO:0010067,GO:0010087,GO:0010154,GO:0022414,GO:0023052,GO:0032501,GO:0032502,GO:0043226,GO:0043227,GO:0043229,GO:0043231,GO:0044424,GO:0044464,GO:0048316,GO:0048507,GO:0048508,GO:0048608,GO:0048731,GO:0048856,GO:0050789,GO:…	NOT SIGIFICANT	WUSCHEL-related homeobox 4 OS=Arabidopsis thaliana OX=3702 GN=WOX4 PE=1 SV=1	周皮发育关键调控基因
Sb02g15950	17.7994	7.94044	-1.16454	0.000686431	0.0382412	GO:0000287,GO:0003674,GO:0003824,GO:0004765,GO:0005488,GO:0005575,GO:0005622,GO:0005623,GO:0005737,GO:0006082,GO:0006520,GO:0006725,GO:0006793,GO:0006796,GO:0006807,GO:0008150,GO:0008152,GO:0008652,GO:0009058,GO:0009072,GO:0009073,GO:0009507,GO:0009536,GO:0009987,GO:0016053,GO:0016301,GO:0016310,GO:0016740,GO:0016772,GO:0016773,GO:0019438,GO:0019632,GO:0019752,GO:0032787,GO:0043167,GO:0043169,GO:…	K00891	Shikimate kinase, chloroplastic OS=Solanum lycopersicum OX=4081 GN=SK PE=1 SV=1
Sb02g16220	14.8627	66.1438	2.15391	0.00023613	0.0244305	GO:0000159,GO:0005575,GO:0005622,GO:0005623,GO:0005634,GO:0005737,GO:0008150,GO:0008287,GO:0019220,GO:0019222,GO:0031323,GO:0032991,GO:0042325,GO:0043226,GO:0043227,GO:0043229,GO:0043231,GO:0044424,GO:0044464,GO:0050789,GO:0050794,GO:0051174,GO:0065007,GO:1902494,GO:1903293	K11584	Serine/threonine protein phosphatase 2A 57 kDa regulatory subunit B' beta isoform OS=Arabidopsis thaliana OX=3702 GN=B'BETA PE=1 SV=1	丝氨酸蛋白磷酸酶
Sb02g16640	0.0349143	0.561437	4.00723	0.000170245	0.0224177	GO:0003674,GO:0005488,GO:0005515,GO:0005575,GO:0005622,GO:0005623,GO:0005737,GO:0005777,GO:0005794,GO:0008092,GO:0012505,GO:0017022,GO:0030742,GO:0032029,GO:0032036,GO:0042579,GO:0043226,GO:0043227,GO:0043229,GO:0043231,GO:0044424,GO:0044444,GO:0044464,GO:0080115	K07910	Ras-related protein RABC2a OS=Arabidopsis thaliana OX=3702 GN=RABC2A PE=1 SV=1
Sb02g16960	41.2821	182.862	2.14716	0.00121698	0.0465516	GO:0000278,GO:0000281,GO:0000910,GO:0000911,GO:0001101,GO:0003674,GO:0005484,GO:0005488,GO:0005515,GO:0005575,GO:0005622,GO:0005623,GO:0005737,GO:0005886,GO:0006810,GO:0007049,GO:0008150,GO:0009504,GO:0009507,GO:0009536,GO:0009605,GO:0009607,GO:0009612,GO:0009628,GO:0009719,GO:0009725,GO:0009737,GO:0009987,GO:0010033,GO:0016020,GO:0016021,GO:0016043,GO:0016192,GO:0022402,GO:0031224,GO:0032506,GO:…	K08509	SNAP25 homologous protein SNAP33 OS=Arabidopsis thaliana OX=3702 GN=SNAP33 PE=1 SV=1
Sb02g18660	48.2344	105.544	1.12972	0.00149657	0.0499478	NOT SIGIFICANT	NOT SIGIFICANT	NOT SIGIFICANT
Sb02g18780	0.608111	0.00947896	-6.00346	3.86289e-05	0.011821	NOT SIGIFICANT	NOT SIGIFICANT	NOT SIGIFICANT
Sb02g20750	1.71994	8.19566	2.2525	0.000227938	0.0243961	GO:0005575,GO:0005622,GO:0005623,GO:0005634,GO:0005737,GO:0008150,GO:0010029,GO:0043226,GO:0043227,GO:0043229,GO:0043231,GO:0044424,GO:0044464,GO:0048580,GO:0050789,GO:0050793,GO:0051239,GO:0065007,GO:1900140,GO:2000026	NOT SIGIFICANT	U-box domain-containing protein 19 OS=Arabidopsis thaliana OX=3702 GN=PUB19 PE=2 SV=1
Sb02g21260	0.249709	2.44179	3.28962	0.000771478	0.0394397	NOT SIGIFICANT	NOT SIGIFICANT	Protein DOG1-like 3 OS=Arabidopsis thaliana OX=3702 GN=DOGL3 PE=2 SV=1
Sb02g21790	37.1219	15.7039	-1.24115	0.000381612	0.0299324	NOT SIGIFICANT	NOT SIGIFICANT	Putative late blight resistance protein homolog R1B-17 OS=Solanum demissum OX=50514 GN=R1B-17 PE=3 SV=1	抗晚疫病蛋白
Sb02g22880	0.639447	3.21505	2.32994	0.000998454	0.0436487	GO:0003674,GO:0005488,GO:0005515,GO:0005575,GO:0005622,GO:0005623,GO:0005737,GO:0005794,GO:0005802,GO:0006810,GO:0008150,GO:0009987,GO:0012505,GO:0016020,GO:0016043,GO:0016192,GO:0022607,GO:0030135,GO:0030136,GO:0030276,GO:0031410,GO:0031982,GO:0031984,GO:0034622,GO:0035459,GO:0035652,GO:0043226,GO:0043227,GO:0043229,GO:0043231,GO:0043933,GO:0044085,GO:0044422,GO:0044424,GO:0044431,GO:0044444,GO:…	K00784	Protein MODIFIED TRANSPORT TO THE VACUOLE 1 OS=Arabidopsis thaliana OX=3702 GN=MTV1 PE=1 SV=1
Sb02g23810	0.868523	0.139957	-2.63358	0.00109543	0.045248	GO:0003674,GO:0003824,GO:0004516,GO:0005575,GO:0005622,GO:0005623,GO:0005737,GO:0005829,GO:0006950,GO:0006979,GO:0008150,GO:0016874,GO:0016879,GO:0044424,GO:0044444,GO:0044464,GO:0050896	K00763	Nicotinate phosphoribosyltransferase 2 OS=Arabidopsis thaliana OX=3702 GN=NAPRT2 PE=2 SV=1
Sb02g24260	3.44036	8.06664	1.22941	0.00143052	0.0494134	NOT SIGIFICANT	NOT SIGIFICANT	NOT SIGIFICANT
Sb02g24460	3.34668	0.760979	-2.1368	0.00120784	0.0466122	NOT SIGIFICANT	K00472	Probable prolyl 4-hydroxylase 9 OS=Arabidopsis thaliana OX=3702 GN=P4H9 PE=2 SV=1
Sb02g24840	11.8989	49.3098	2.05105	0.000475069	0.032561	GO:0008150,GO:0009719,GO:0009725,GO:0009743,GO:0009744,GO:0010033,GO:0034285,GO:0042221,GO:0050896,GO:1901700	K07297	Heptahelical transmembrane protein ADIPOR3 OS=Oryza sativa subsp. japonica OX=39947 GN=ADIPOR3 PE=2 SV=1
Sb02g25460	4.79354	17.8377	1.89577	0.000802234	0.0397042	GO:0003674,GO:0003824,GO:0004842,GO:0006464,GO:0006807,GO:0008150,GO:0008152,GO:0009314,GO:0009411,GO:0009416,GO:0009628,GO:0009987,GO:0016567,GO:0016740,GO:0019538,GO:0019787,GO:0032446,GO:0036211,GO:0043170,GO:0043412,GO:0044237,GO:0044238,GO:0044260,GO:0044267,GO:0050896,GO:0061630,GO:0061659,GO:0070647,GO:0071704,GO:0140096,GO:1901564	K04506	E3 ubiquitin-protein ligase SINA-like 10 OS=Arabidopsis thaliana OX=3702 GN=At5g37930 PE=2 SV=1
Sb02g26840	44.9426	90.1792	1.00471	0.000682829	0.0382367	NOT SIGIFICANT	NOT SIGIFICANT	Putative clathrin assembly protein At4g40080 OS=Arabidopsis thaliana OX=3702 GN=At4g40080 PE=2 SV=2
Sb02g27510	0.954531	9.37326	3.29569	0.00015974	0.0222478	NOT SIGIFICANT	K10706	Probable helicase MAGATAMA 3 OS=Arabidopsis thaliana OX=3702 GN=MAA3 PE=2 SV=1
Sb02g27540	7.30943	0.0108135	-9.40078	0.000510595	0.0335157	NOT SIGIFICANT	K10706	Probable helicase MAGATAMA 3 OS=Arabidopsis thaliana OX=3702 GN=MAA3 PE=2 SV=1
Sb02g29820	144.27	27.4813	-2.39225	7.44537e-05	0.0152609	GO:0000287,GO:0003674,GO:0003824,GO:0004765,GO:0005488,GO:0005575,GO:0005622,GO:0005623,GO:0005737,GO:0006082,GO:0006520,GO:0006725,GO:0006793,GO:0006796,GO:0006807,GO:0008150,GO:0008152,GO:0008652,GO:0009058,GO:0009072,GO:0009073,GO:0009507,GO:0009536,GO:0009987,GO:0016053,GO:0016301,GO:0016310,GO:0016740,GO:0016772,GO:0016773,GO:0019438,GO:0019632,GO:0019752,GO:0032787,GO:0043167,GO:0043169,GO:…	K00891	Shikimate kinase, chloroplastic OS=Solanum lycopersicum OX=4081 GN=SK PE=1 SV=1
Sb02g30260	47.7265	123.153	1.36759	0.00105597	0.0444632	NOT SIGIFICANT	NOT SIGIFICANT	NOT SIGIFICANT
Sb02g30970	8.79529	3.2304	-1.44502	0.00147733	0.0499191	NOT SIGIFICANT	NOT SIGIFICANT	NOT SIGIFICANT
Sb02g32160	0.323309	5.42181	4.06779	0.000415766	0.0304153	NOT SIGIFICANT	K17506	Probable protein phosphatase 2C 10 OS=Arabidopsis thaliana OX=3702 GN=At1g34750 PE=2 SV=1
Sb02g33570	3.65649	0.775515	-2.23723	0.000538645	0.0340207	NOT SIGIFICANT	K15455	Diphthamide biosynthesis protein 3 OS=Ashbya gossypii (strain ATCC 10895 / CBS 109.51 / FGSC 9923 / NRRL Y-1056) OX=284811 GN=DPH3 PE=3 SV=1
Sb02g33610	54.5396	133.489	1.29135	0.00118548	0.0463253	GO:0000166,GO:0001664,GO:0001882,GO:0001883,GO:0003674,GO:0003824,GO:0003924,GO:0005102,GO:0005488,GO:0005515,GO:0005525,GO:0005575,GO:0005622,GO:0005623,GO:0005634,GO:0005834,GO:0005886,GO:0006950,GO:0006952,GO:0007154,GO:0007165,GO:0007186,GO:0007187,GO:0007188,GO:0008150,GO:0009605,GO:0009607,GO:0009617,GO:0009898,GO:0009987,GO:0016020,GO:0016462,GO:0016787,GO:0016817,GO:0016818,GO:0017076,GO:…	K04630	Extra-large guanine nucleotide-binding protein 1 OS=Arabidopsis thaliana OX=3702 GN=XLG1 PE=1 SV=2
Sb02g35390	5.00468	15.7513	1.65412	4.12801e-05	0.0119586	NOT SIGIFICANT	NOT SIGIFICANT	NOT SIGIFICANT
Sb02g36780	27.9893	1.95067	-3.84283	0.000180531	0.0225425	GO:0005575,GO:0005622,GO:0005623,GO:0005737,GO:0009507,GO:0009532,GO:0009534,GO:0009535,GO:0009536,GO:0009570,GO:0009579,GO:0016020,GO:0031976,GO:0031984,GO:0034357,GO:0042651,GO:0043226,GO:0043227,GO:0043229,GO:0043231,GO:0044422,GO:0044424,GO:0044434,GO:0044435,GO:0044436,GO:0044444,GO:0044446,GO:0044464,GO:0055035	K03110	Cell division protein FtsY homolog, chloroplastic OS=Arabidopsis thaliana OX=3702 GN=CPFTSY PE=1 SV=2
Sb02g36940	4.39278	26.2596	2.57964	0.00112984	0.0456285	GO:0000349,GO:0000375,GO:0000377,GO:0000393,GO:0000398,GO:0000974,GO:0001701,GO:0001824,GO:0005575,GO:0005622,GO:0005623,GO:0005634,GO:0005681,GO:0005684,GO:0006139,GO:0006259,GO:0006281,GO:0006283,GO:0006289,GO:0006351,GO:0006396,GO:0006397,GO:0006725,GO:0006807,GO:0006950,GO:0006974,GO:0007275,GO:0008150,GO:0008152,GO:0008380,GO:0009058,GO:0009059,GO:0009790,GO:0009792,GO:0009987,GO:0010467,GO:…	K12867	Pre-mRNA-splicing factor SYF1 OS=Rattus norvegicus OX=10116 GN=Xab2 PE=2 SV=1
Sb02g37070	61.8826	9.27086	-2.73876	0.000341543	0.0286513	NOT SIGIFICANT	K11253	Histone H3.2 OS=Nicotiana tabacum OX=4097 GN=B34 PE=1 SV=1
Sb02g37410	13.3137	29.3592	1.1409	4.16337e-05	0.0117477	NOT SIGIFICANT	K03439	tRNA (guanine-N(7)-)-methyltransferase OS=Synechocystis sp. (strain PCC 6803 / Kazusa) OX=1111708 GN=trmB PE=3 SV=2
Sb02g37860	8.85843	0.0229695	-8.59119	6.27549e-05	0.013913	GO:0000325,GO:0003674,GO:0003824,GO:0005215,GO:0005575,GO:0005622,GO:0005623,GO:0005737,GO:0005773,GO:0005774,GO:0005911,GO:0006810,GO:0008150,GO:0009506,GO:0009605,GO:0009607,GO:0009624,GO:0015399,GO:0015405,GO:0016020,GO:0016462,GO:0016787,GO:0016817,GO:0016818,GO:0016887,GO:0017111,GO:0022804,GO:0022857,GO:0030054,GO:0031090,GO:0042623,GO:0042626,GO:0043207,GO:0043226,GO:0043227,GO:0043229,GO:…	K05665	ABC transporter C family member 9 OS=Arabidopsis thaliana OX=3702 GN=ABCC9 PE=2 SV=2
Sb02g37990	8.63588	3.28522	-1.39435	0.00048445	0.0326883	NOT SIGIFICANT	NOT SIGIFICANT	Protein TRIGALACTOSYLDIACYLGLYCEROL 4, chloroplastic OS=Arabidopsis thaliana OX=3702 GN=TGD4 PE=1 SV=1
Sb02g39320	2.97825	0.85082	-1.80754	0.000421498	0.0306284	NOT SIGIFICANT	NOT SIGIFICANT	NOT SIGIFICANT
Sb02g41650	3.28545	1.18255	-1.47419	0.000688769	0.0382733	GO:0000003,GO:0003006,GO:0003674,GO:0003676,GO:0003723,GO:0003824,GO:0004518,GO:0004519,GO:0005488,GO:0005575,GO:0005622,GO:0005623,GO:0005634,GO:0005737,GO:0005739,GO:0006139,GO:0006725,GO:0006807,GO:0007275,GO:0008150,GO:0008152,GO:0009451,GO:0009790,GO:0009791,GO:0009793,GO:0009987,GO:0010154,GO:0016070,GO:0016787,GO:0016788,GO:0022414,GO:0032501,GO:0032502,GO:0034641,GO:0043170,GO:0043226,GO:…	NOT SIGIFICANT	Pentatricopeptide repeat-containing protein At1g10270 OS=Arabidopsis thaliana OX=3702 GN=GRP23 PE=1 SV=1
Sb02g41950	0.0108537	0.0300649	1.4699	8.58255e-07	0.0026639	NOT SIGIFICANT	K18163	NADH dehydrogenase (ubiquinone) complex I, assembly factor 6 OS=Bos taurus OX=9913 GN=NDUFAF6 PE=2 SV=1
Sb02g42320	7.17387	23.0456	1.68367	0.000912198	0.041463	NOT SIGIFICANT	K22071	Adrenodoxin-like protein 2, mitochondrial OS=Arabidopsis thaliana OX=3702 GN=MFDX2 PE=2 SV=1
Sb02g42710	21.7622	9.65906	-1.17187	0.00108859	0.0452233	NOT SIGIFICANT	NOT SIGIFICANT	NOT SIGIFICANT
Sb02g43330	31.7086	75.1866	1.2456	0.000275422	0.0263616	NOT SIGIFICANT	K08900	AAA-ATPase At2g46620 OS=Arabidopsis thaliana OX=3702 GN=At2g46620 PE=2 SV=1
Sb03g00060	1.26501	0.209114	-2.59679	8.19923e-06	0.00848308	GO:0003674,GO:0005215,GO:0005216,GO:0005244,GO:0005249,GO:0005261,GO:0005267,GO:0005575,GO:0005623,GO:0005886,GO:0005887,GO:0006810,GO:0006811,GO:0006812,GO:0006813,GO:0006950,GO:0006952,GO:0008150,GO:0008324,GO:0009605,GO:0009607,GO:0009617,GO:0009620,GO:0009987,GO:0015075,GO:0015077,GO:0015079,GO:0015267,GO:0015318,GO:0015672,GO:0016020,GO:0016021,GO:0022803,GO:0022832,GO:0022836,GO:0022838,GO:…	K05391	Cyclic nucleotide-gated ion channel 1 OS=Arabidopsis thaliana OX=3702 GN=CNGC1 PE=1 SV=1
Sb03g00120	8.45877	2.15413	-1.97335	0.00138802	0.0488776	NOT SIGIFICANT	NOT SIGIFICANT	NOT SIGIFICANT
Sb03g00410	11.9235	4.4796	-1.41237	0.00129623	0.0481423	GO:0000166,GO:0003674,GO:0005488,GO:0005575,GO:0005623,GO:0005886,GO:0008144,GO:0016020,GO:0016208,GO:0017076,GO:0030554,GO:0032553,GO:0032555,GO:0032559,GO:0036094,GO:0043167,GO:0043168,GO:0043169,GO:0044464,GO:0071944,GO:0097159,GO:0097367,GO:1901265,GO:1901363	NOT SIGIFICANT	Universal stress protein A-like protein OS=Arabidopsis thaliana OX=3702 GN=At3g01520 PE=1 SV=2
Sb03g00960	0.619275	0.0198892	-4.96053	0.00100607	0.0438056	NOT SIGIFICANT	NOT SIGIFICANT	Probable carboxylesterase 11 OS=Arabidopsis thaliana OX=3702 GN=CXE11 PE=2 SV=1
Sb03g01120	21.6417	6.11164	-1.82418	0.000605324	0.0362311	NOT SIGIFICANT	NOT SIGIFICANT	NOT SIGIFICANT
Sb03g01570	0.0400677	7.72098	7.5902	3.22288e-05	0.0114793	NOT SIGIFICANT	NOT SIGIFICANT	Protein NUCLEAR FUSION DEFECTIVE 4 OS=Arabidopsis thaliana OX=3702 GN=NFD4 PE=3 SV=1
Sb03g02240	7.91218	23.3328	1.56021	2.59518e-05	0.0108433	GO:0002376,GO:0003674,GO:0003824,GO:0004842,GO:0006464,GO:0006807,GO:0006950,GO:0006952,GO:0006955,GO:0008150,GO:0008152,GO:0009605,GO:0009607,GO:0009814,GO:0009987,GO:0010033,GO:0010200,GO:0010243,GO:0016567,GO:0016740,GO:0019538,GO:0019787,GO:0032446,GO:0036211,GO:0042221,GO:0042493,GO:0043170,GO:0043207,GO:0043412,GO:0044237,GO:0044238,GO:0044260,GO:0044267,GO:0045087,GO:0050896,GO:0051704,GO:…	NOT SIGIFICANT	U-box domain-containing protein 25 OS=Arabidopsis thaliana OX=3702 GN=PUB25 PE=2 SV=1	响应胁迫的E3
Sb03g02480	205.72	28.9626	-2.82842	0.000198499	0.0235672	NOT SIGIFICANT	K21594	Translation factor GUF1 homolog, mitochondrial OS=Ricinus communis OX=3988 GN=RCOM_0855130 PE=3 SV=1
Sb03g03160	2.7018	18.608	2.78393	0.00128676	0.0479543	GO:0005575,GO:0005622,GO:0005623,GO:0005634,GO:0005737,GO:0043226,GO:0043227,GO:0043229,GO:0043231,GO:0044424,GO:0044464	NOT SIGIFICANT	O-fucosyltransferase 38 OS=Arabidopsis thaliana OX=3702 GN=OFUT38 PE=2 SV=1
Sb03g03440	5.30872	0.0251835	-7.71974	1.22118e-05	0.0102048	NOT SIGIFICANT	NOT SIGIFICANT	ADP-ribosylation factor GTPase-activating protein AGD3 OS=Arabidopsis thaliana OX=3702 GN=AGD3 PE=1 SV=1
Sb03g04650	7.12252	14.3862	1.01423	0.000680755	0.038318	GO:0005575,GO:0005622,GO:0005623,GO:0005737,GO:0009507,GO:0009536,GO:0043226,GO:0043227,GO:0043229,GO:0043231,GO:0044424,GO:0044444,GO:0044464	K03696	ATP-dependent Clp protease ATP-binding subunit ClpA homolog CD4B, chloroplastic OS=Solanum lycopersicum OX=4081 GN=CD4B PE=3 SV=1
Sb03g04800	0.238061	0.0095049	-4.64651	4.46505e-05	0.0121265	GO:0000003,GO:0003006,GO:0003674,GO:0005102,GO:0005488,GO:0005515,GO:0005575,GO:0005623,GO:0005886,GO:0007275,GO:0008150,GO:0009791,GO:0009888,GO:0009908,GO:0010073,GO:0010075,GO:0016020,GO:0022414,GO:0032501,GO:0032502,GO:0033612,GO:0040008,GO:0043621,GO:0044464,GO:0048229,GO:0048367,GO:0048437,GO:0048507,GO:0048509,GO:0048608,GO:0048638,GO:0048731,GO:0048856,GO:0050789,GO:0050793,GO:0061458,GO:…	K04733	Leucine-rich repeat receptor-like serine/threonine-protein kinase BAM1 OS=Arabidopsis thaliana OX=3702 GN=BAM1 PE=1 SV=1
Sb03g05640	9.0808	0.0221654	-8.67837	0.000539484	0.033975	NOT SIGIFICANT	NOT SIGIFICANT	NOT SIGIFICANT
Sb03g06920	2.79535	0.117219	-4.57575	0.00138292	0.0489361	NOT SIGIFICANT	K20818	KxDL motif-containing protein 1 OS=Rattus norvegicus OX=10116 GN=Kxd1 PE=1 SV=1
Sb03g07070	0.00946942	0.0354912	1.90611	2.31329e-06	0.00502608	GO:0000156,GO:0000160,GO:0003674,GO:0003824,GO:0004721,GO:0005575,GO:0005622,GO:0005623,GO:0005634,GO:0005737,GO:0006355,GO:0006464,GO:0006470,GO:0006793,GO:0006796,GO:0006807,GO:0007154,GO:0007165,GO:0008150,GO:0008152,GO:0009719,GO:0009725,GO:0009735,GO:0009736,GO:0009755,GO:0009889,GO:0009987,GO:0010033,GO:0010468,GO:0010556,GO:0016311,GO:0016787,GO:0016788,GO:0016791,GO:0019219,GO:0019222,GO:…	NOT SIGIFICANT	Two-component response regulator 24 OS=Arabidopsis thaliana OX=3702 GN=ARR24 PE=2 SV=1
Sb03g07440	5.37326	0.318347	-4.07713	0.000229424	0.0244348	GO:0005575,GO:0005622,GO:0005623,GO:0005737,GO:0006091,GO:0006807,GO:0008150,GO:0008152,GO:0009507,GO:0009534,GO:0009536,GO:0009543,GO:0009579,GO:0009765,GO:0009987,GO:0010206,GO:0015979,GO:0019538,GO:0019684,GO:0030091,GO:0031976,GO:0031977,GO:0031978,GO:0031984,GO:0043170,GO:0043226,GO:0043227,GO:0043229,GO:0043231,GO:0044237,GO:0044238,GO:0044260,GO:0044267,GO:0044422,GO:0044424,GO:0044434,GO:…	NOT SIGIFICANT	Protease Do-like 5, chloroplastic OS=Arabidopsis thaliana OX=3702 GN=DEGP5 PE=1 SV=3
Sb03g07750	8.05604	30.5444	1.92276	0.000699843	0.0382047	NOT SIGIFICANT	NOT SIGIFICANT	NOT SIGIFICANT
Sb03g08490	3.15026	0.135588	-4.53817	0.000135765	0.0203432	NOT SIGIFICANT	K03020	DNA-directed RNA polymerases I and III subunit RPAC2 OS=Xenopus laevis OX=8355 GN=polr1d PE=3 SV=1
Sb03g09100	5.73128	14.9085	1.3792	2.85113e-05	0.011688	NOT SIGIFICANT	NOT SIGIFICANT	NOT SIGIFICANT
Sb03g09220	16.4298	40.1773	1.29007	0.00142032	0.0494541	GO:0003674,GO:0003700,GO:0006355,GO:0008150,GO:0009889,GO:0010468,GO:0010556,GO:0019219,GO:0019222,GO:0031323,GO:0031326,GO:0050789,GO:0050794,GO:0051171,GO:0051252,GO:0060255,GO:0065007,GO:0080090,GO:0140110,GO:1903506,GO:2000112,GO:2001141	NOT SIGIFICANT	Myb family transcription factor MOF1 OS=Oryza sativa subsp. japonica OX=39947 GN=MOF1 PE=1 SV=1
Sb03g10150	10.2462	3.55917	-1.52547	7.83129e-05	0.0157547	NOT SIGIFICANT	NOT SIGIFICANT	NOT SIGIFICANT
Sb03g10170	6.12207	0.60019	-3.35053	0.000796478	0.0397818	GO:0000151,GO:0000152,GO:0001709,GO:0005575,GO:0005622,GO:0005623,GO:0005634,GO:0006355,GO:0008150,GO:0009888,GO:0009889,GO:0009890,GO:0009892,GO:0009987,GO:0010073,GO:0010074,GO:0010076,GO:0010077,GO:0010468,GO:0010492,GO:0010556,GO:0010558,GO:0010605,GO:0010629,GO:0019219,GO:0019222,GO:0019827,GO:0030154,GO:0031323,GO:0031324,GO:0031326,GO:0031327,GO:0031519,GO:0032501,GO:0032502,GO:0032991,GO:…	K10695	Putative E3 ubiquitin-protein ligase RING1a OS=Arabidopsis thaliana OX=3702 GN=RING1A PE=1 SV=2
Sb03g11490	4.85233	30.6749	2.66031	0.000716623	0.0382557	GO:0003674,GO:0003824,GO:0004672,GO:0004674,GO:0005488,GO:0005515,GO:0005516,GO:0005575,GO:0005623,GO:0005886,GO:0006464,GO:0006468,GO:0006793,GO:0006796,GO:0006807,GO:0008150,GO:0008152,GO:0009987,GO:0016020,GO:0016301,GO:0016310,GO:0016740,GO:0016772,GO:0016773,GO:0019538,GO:0036211,GO:0043170,GO:0043412,GO:0044237,GO:0044238,GO:0044260,GO:0044267,GO:0044464,GO:0071704,GO:0071944,GO:0140096,GO:…	K04733	G-type lectin S-receptor-like serine/threonine-protein kinase B120 OS=Arabidopsis thaliana OX=3702 GN=B120 PE=2 SV=1
Sb03g13100	3.23103	95.2673	4.88191	0.000591679	0.0357095	NOT SIGIFICANT	NOT SIGIFICANT	NOT SIGIFICANT
Sb03g13110	7.09723	43.4207	2.61306	0.000797277	0.0397304	NOT SIGIFICANT	NOT SIGIFICANT	ER membrane protein complex subunit 3 OS=Danio rerio OX=7955 GN=emc3 PE=2 SV=1
Sb03g13380	15.8334	56.4795	1.83476	0.000312814	0.0278546	NOT SIGIFICANT	NOT SIGIFICANT	NOT SIGIFICANT
Sb03g13880	1.03809	5.08007	2.29092	0.00109402	0.0452759	NOT SIGIFICANT	NOT SIGIFICANT	Uncharacterized protein YqkD OS=Bacillus subtilis (strain 168) OX=224308 GN=yqkD PE=4 SV=1
Sb03g14540	48.5604	20.0467	-1.27642	0.00140418	0.0491281	NOT SIGIFICANT	NOT SIGIFICANT	NOT SIGIFICANT
Sb03g14550	0.00972217	0.139382	3.84162	0.000934153	0.0419346	NOT SIGIFICANT	NOT SIGIFICANT	RRP15-like protein OS=Bos taurus OX=9913 GN=RRP15 PE=2 SV=1
Sb03g15200	0.574119	0.0359432	-3.99756	0.00112636	0.045743	GO:0000096,GO:0000097,GO:0003674,GO:0003824,GO:0005488,GO:0005575,GO:0005622,GO:0005623,GO:0005634,GO:0005737,GO:0005739,GO:0005829,GO:0006082,GO:0006520,GO:0006534,GO:0006790,GO:0006807,GO:0006950,GO:0007154,GO:0008150,GO:0008152,GO:0008270,GO:0008374,GO:0008652,GO:0009001,GO:0009058,GO:0009069,GO:0009070,GO:0009266,GO:0009267,GO:0009409,GO:0009507,GO:0009536,GO:0009605,GO:0009628,GO:0009970,GO:…	K00640	Serine acetyltransferase 3, mitochondrial OS=Arabidopsis thaliana OX=3702 GN=SAT3 PE=1 SV=3
Sb03g15260	5.18978	11.6144	1.16217	0.000309087	0.027636	GO:0000003,GO:0000228,GO:0000280,GO:0000706,GO:0000724,GO:0000725,GO:0000729,GO:0003674,GO:0003676,GO:0003677,GO:0003824,GO:0003916,GO:0003918,GO:0004518,GO:0004519,GO:0004520,GO:0004536,GO:0005488,GO:0005575,GO:0005622,GO:0005623,GO:0005634,GO:0005694,GO:0006139,GO:0006259,GO:0006281,GO:0006302,GO:0006310,GO:0006725,GO:0006807,GO:0006950,GO:0006974,GO:0006996,GO:0007049,GO:0007059,GO:0007127,GO:…	K10878	Meiotic recombination protein SPO11-1 OS=Arabidopsis thaliana OX=3702 GN=SPO11-1 PE=1 SV=1
Sb03g15350	17.5518	6.68385	-1.39287	0.000155727	0.0221142	GO:0005575,GO:0005618,GO:0005623,GO:0005886,GO:0007275,GO:0008150,GO:0016020,GO:0022622,GO:0030312,GO:0031224,GO:0031225,GO:0031226,GO:0032501,GO:0032502,GO:0044425,GO:0044459,GO:0044464,GO:0046658,GO:0048364,GO:0048367,GO:0048731,GO:0048856,GO:0071944,GO:0099402	NOT SIGIFICANT	Fasciclin-like arabinogalactan protein 1 OS=Arabidopsis thaliana OX=3702 GN=FLA1 PE=1 SV=1
Sb03g16320	13.2046	6.1731	-1.09697	0.0010865	0.0452231	GO:0003674,GO:0005488,GO:0005575,GO:0005622,GO:0005623,GO:0005737,GO:0006417,GO:0008150,GO:0009507,GO:0009536,GO:0009889,GO:0009890,GO:0009892,GO:0010468,GO:0010556,GO:0010558,GO:0010605,GO:0010608,GO:0010629,GO:0017148,GO:0019222,GO:0031323,GO:0031324,GO:0031326,GO:0031327,GO:0032268,GO:0032269,GO:0034248,GO:0034249,GO:0043021,GO:0043023,GO:0043226,GO:0043227,GO:0043229,GO:0043231,GO:0044087,GO:…	NOT SIGIFICANT	Protein Iojap, chloroplastic OS=Arabidopsis thaliana OX=3702 GN=IJ PE=2 SV=1
Sb03g16950	0.0192102	39.4433	11.0037	0.00134466	0.0490193	GO:0001101,GO:0003674,GO:0003824,GO:0004842,GO:0005575,GO:0005622,GO:0005623,GO:0005634,GO:0005737,GO:0005886,GO:0006464,GO:0006725,GO:0006807,GO:0006950,GO:0006952,GO:0007154,GO:0007165,GO:0008150,GO:0008152,GO:0009308,GO:0009605,GO:0009607,GO:0009611,GO:0009617,GO:0009690,GO:0009719,GO:0009725,GO:0009753,GO:0009755,GO:0009850,GO:0009867,GO:0009987,GO:0010033,GO:0010817,GO:0016020,GO:0016567,GO:…	K16280	E3 ubiquitin-protein ligase RGLG4 OS=Arabidopsis thaliana OX=3702 GN=RGLG4 PE=1 SV=1	JA诱导的E3
Sb03g17130	0.00912673	0.278797	4.93297	0.000183341	0.0226333	NOT SIGIFICANT	NOT SIGIFICANT	NOT SIGIFICANT
Sb03g17370	0.970972	0.252722	-1.94188	0.000253809	0.0251804	GO:0001067,GO:0003674,GO:0003676,GO:0003677,GO:0003700,GO:0005488,GO:0006355,GO:0006950,GO:0007154,GO:0008150,GO:0009267,GO:0009605,GO:0009889,GO:0009890,GO:0009892,GO:0009987,GO:0009991,GO:0010033,GO:0010036,GO:0010200,GO:0010243,GO:0010468,GO:0010556,GO:0010558,GO:0010605,GO:0010629,GO:0016036,GO:0019219,GO:0019222,GO:0031323,GO:0031324,GO:0031326,GO:0031327,GO:0031667,GO:0031668,GO:0031669,GO:…	NOT SIGIFICANT	WRKY transcription factor 6 OS=Arabidopsis thaliana OX=3702 GN=WRKY6 PE=1 SV=1	响应ABA，水杨酸，低磷等胁迫的WRKY
Sb03g18500	6.08829	21.5853	1.82594	0.000684918	0.0382551	GO:0003674,GO:0003735,GO:0005198,GO:0005575,GO:0005622,GO:0005623,GO:0005634,GO:0005730,GO:0005737,GO:0005829,GO:0005840,GO:0005844,GO:0015934,GO:0022625,GO:0022626,GO:0031974,GO:0031981,GO:0032991,GO:0042788,GO:0043226,GO:0043227,GO:0043228,GO:0043229,GO:0043231,GO:0043232,GO:0043233,GO:0044391,GO:0044422,GO:0044424,GO:0044428,GO:0044444,GO:0044445,GO:0044446,GO:0044464,GO:0070013,GO:1990904	K02912	60S ribosomal protein L32-1 OS=Arabidopsis thaliana OX=3702 GN=RPL32A PE=2 SV=2
Sb03g18560	13.0939	2.46985	-2.4064	0.000247479	0.0248934	GO:0003674,GO:0003700,GO:0005575,GO:0005622,GO:0005623,GO:0005634,GO:0006355,GO:0008150,GO:0009314,GO:0009416,GO:0009628,GO:0009637,GO:0009889,GO:0010468,GO:0010556,GO:0019219,GO:0019222,GO:0031323,GO:0031326,GO:0043226,GO:0043227,GO:0043229,GO:0043231,GO:0044424,GO:0044464,GO:0050789,GO:0050794,GO:0050896,GO:0051171,GO:0051252,GO:0060255,GO:0065007,GO:0080090,GO:0140110,GO:1903506,GO:2000112,GO:…	NOT SIGIFICANT	Transcription factor bHLH62 OS=Arabidopsis thaliana OX=3702 GN=BHLH62 PE=2 SV=1
Sb03g20280	16.0167	5.68693	-1.49386	0.000620728	0.0365489	GO:0003674,GO:0003756,GO:0003824,GO:0005575,GO:0005622,GO:0005623,GO:0005737,GO:0005783,GO:0006457,GO:0006950,GO:0008150,GO:0009987,GO:0012505,GO:0016853,GO:0016860,GO:0016864,GO:0033554,GO:0034976,GO:0043226,GO:0043227,GO:0043229,GO:0043231,GO:0044424,GO:0044444,GO:0044464,GO:0050896,GO:0051716,GO:0140096	K13984	Protein disulfide-isomerase 5-1 OS=Arabidopsis thaliana OX=3702 GN=PDIL5-1 PE=2 SV=1
Sb03g21290	91.6238	261.409	1.51252	0.00132357	0.0484944	NOT SIGIFICANT	NOT SIGIFICANT	Protein INVOLVED IN DE NOVO 2 OS=Arabidopsis thaliana OX=3702 GN=IDN2 PE=1 SV=1
Sb03g22170	3.66792	1.39593	-1.39374	1.28918e-05	0.010374	NOT SIGIFICANT	NOT SIGIFICANT	Protein NETWORKED 4B OS=Arabidopsis thaliana OX=3702 GN=NET4B PE=2 SV=1
Sb03g23350	0.0502467	3.7863	6.23562	0.000720803	0.0383845	GO:0000226,GO:0005575,GO:0005622,GO:0005623,GO:0005634,GO:0005737,GO:0005819,GO:0005856,GO:0006996,GO:0007010,GO:0007017,GO:0007049,GO:0007051,GO:0008150,GO:0009524,GO:0009987,GO:0015630,GO:0016043,GO:0022402,GO:0022607,GO:0043226,GO:0043227,GO:0043228,GO:0043229,GO:0043231,GO:0043232,GO:0044085,GO:0044422,GO:0044424,GO:0044430,GO:0044444,GO:0044446,GO:0044464,GO:0051225,GO:0070925,GO:0071840,GO:…	K16586	AUGMIN subunit 3 OS=Arabidopsis thaliana OX=3702 GN=AUG3 PE=1 SV=1
Sb03g24050	16.5083	5.63138	-1.55163	0.000191873	0.0231601	NOT SIGIFICANT	K14972	PAX-interacting protein 1 OS=Mus musculus OX=10090 GN=Paxip1 PE=1 SV=1
Sb03g24610	7.31418	1.13802	-2.68417	0.00101648	0.0438196	GO:0003674,GO:0003824,GO:0004788,GO:0005575,GO:0005622,GO:0005623,GO:0005737,GO:0005829,GO:0006725,GO:0006732,GO:0006766,GO:0006767,GO:0006772,GO:0006790,GO:0006793,GO:0006796,GO:0006807,GO:0008150,GO:0008152,GO:0009058,GO:0009108,GO:0009229,GO:0009987,GO:0016740,GO:0016772,GO:0016778,GO:0017144,GO:0018130,GO:0019438,GO:0019637,GO:0034641,GO:0042357,GO:0042723,GO:0044237,GO:0044249,GO:0044271,GO:…	K00949	Thiamine pyrophosphokinase 1 OS=Arabidopsis thaliana OX=3702 GN=TPK1 PE=1 SV=1
Sb03g24690	2.6641	8.45656	1.66642	0.000855479	0.0409405	GO:0001101,GO:0002376,GO:0003674,GO:0003824,GO:0004842,GO:0005575,GO:0005622,GO:0005623,GO:0005634,GO:0005886,GO:0006082,GO:0006464,GO:0006508,GO:0006511,GO:0006725,GO:0006807,GO:0006950,GO:0006952,GO:0006955,GO:0008150,GO:0008152,GO:0008219,GO:0009056,GO:0009057,GO:0009058,GO:0009605,GO:0009607,GO:0009617,GO:0009626,GO:0009627,GO:0009696,GO:0009697,GO:0009719,GO:0009725,GO:0009751,GO:0009814,GO:…	K16275	E3 ubiquitin-protein ligase BAH1 OS=Arabidopsis thaliana OX=3702 GN=BAH1 PE=1 SV=1
Sb03g25640	20.6845	5.58999	-1.88763	0.00116046	0.0460937	GO:0000217,GO:0000404,GO:0003674,GO:0003676,GO:0003677,GO:0003684,GO:0003690,GO:0003824,GO:0005488,GO:0005575,GO:0005622,GO:0005623,GO:0006139,GO:0006259,GO:0006281,GO:0006290,GO:0006298,GO:0006725,GO:0006807,GO:0006950,GO:0006974,GO:0006996,GO:0008094,GO:0008150,GO:0008152,GO:0009987,GO:0016043,GO:0016462,GO:0016787,GO:0016817,GO:0016818,GO:0016887,GO:0017111,GO:0030983,GO:0032135,GO:0032300,GO:…	K08737	DNA mismatch repair protein MSH6 OS=Arabidopsis thaliana OX=3702 GN=MSH6 PE=1 SV=2
Sb03g26240	0.192995	1.36799	2.82542	0.00115784	0.046074	GO:0005575,GO:0005576	NOT SIGIFICANT	Protein GAST1 OS=Solanum lycopersicum OX=4081 GN=GAST1 PE=2 SV=1
Sb03g26350	1.43077	3.88998	1.44296	0.00145655	0.0496806	GO:0000003,GO:0000151,GO:0003006,GO:0003674,GO:0005488,GO:0005515,GO:0005575,GO:0005622,GO:0005623,GO:0005634,GO:0005654,GO:0006996,GO:0007154,GO:0007165,GO:0007275,GO:0008150,GO:0009314,GO:0009416,GO:0009628,GO:0009637,GO:0009639,GO:0009640,GO:0009648,GO:0009657,GO:0009658,GO:0009791,GO:0009987,GO:0010017,GO:0010099,GO:0010100,GO:0010114,GO:0010218,GO:0010228,GO:0016043,GO:0016604,GO:0022414,GO:…	K16240	Protein SUPPRESSOR OF PHYA-105 1 OS=Arabidopsis thaliana OX=3702 GN=SPA1 PE=1 SV=1
Sb03g26460	2.93762	7.62722	1.37651	6.80211e-05	0.0146326	GO:0003674,GO:0003824,GO:0003993,GO:0004620,GO:0004629,GO:0006629,GO:0006644,GO:0006793,GO:0006796,GO:0008081,GO:0008150,GO:0008152,GO:0009056,GO:0009395,GO:0009405,GO:0009987,GO:0016042,GO:0016298,GO:0016311,GO:0016787,GO:0016788,GO:0016791,GO:0019637,GO:0034480,GO:0035821,GO:0042578,GO:0044003,GO:0044237,GO:0044238,GO:0044242,GO:0044248,GO:0044255,GO:0044403,GO:0044419,GO:0046434,GO:0051701,GO:…	K01114	Non-specific phospholipase C2 OS=Arabidopsis thaliana OX=3702 GN=NPC2 PE=2 SV=1
Sb03g27690	2.75849	19.8387	2.84636	0.000787325	0.0397819	GO:0000325,GO:0003674,GO:0005215,GO:0005310,GO:0005342,GO:0005575,GO:0005622,GO:0005623,GO:0005737,GO:0005773,GO:0005774,GO:0006810,GO:0006811,GO:0006820,GO:0006835,GO:0008150,GO:0008509,GO:0008514,GO:0009705,GO:0015075,GO:0015140,GO:0015318,GO:0015556,GO:0015711,GO:0015740,GO:0015743,GO:0015849,GO:0016020,GO:0022857,GO:0031090,GO:0034220,GO:0043226,GO:0043227,GO:0043229,GO:0043231,GO:0044422,GO:…	NOT SIGIFICANT	Aluminum-activated malate transporter 13 OS=Arabidopsis thaliana OX=3702 GN=ALMT13 PE=2 SV=1
Sb03g27860	2.89315	0.222131	-3.70316	1.78808e-05	0.00996143	NOT SIGIFICANT	NOT SIGIFICANT	Cyclin-P3-1 OS=Oryza sativa subsp. japonica OX=39947 GN=CYCP3-1 PE=3 SV=1
Sb03g27870	2.89315	0.222131	-3.70316	1.78808e-05	0.00996143	GO:0005575,GO:0005622,GO:0005623,GO:0005634,GO:0005654,GO:0005737,GO:0006139,GO:0006259,GO:0006260,GO:0006261,GO:0006275,GO:0006725,GO:0006807,GO:0008150,GO:0008152,GO:0008156,GO:0008285,GO:0009058,GO:0009059,GO:0009889,GO:0009890,GO:0009892,GO:0009987,GO:0010556,GO:0010558,GO:0010605,GO:0019219,GO:0019222,GO:0031261,GO:0031323,GO:0031324,GO:0031326,GO:0031327,GO:0031974,GO:0031981,GO:0032991,GO:…	K10523	ARM REPEAT PROTEIN INTERACTING WITH ABF2 OS=Arabidopsis thaliana OX=3702 GN=ARIA PE=1 SV=2
Sb03g28280	10.7223	99.4597	3.2135	2.46628e-05	0.0109357	NOT SIGIFICANT	NOT SIGIFICANT	Serine/threonine-protein kinase STY13 OS=Arabidopsis thaliana OX=3702 GN=STY13 PE=1 SV=2
Sb03g29300	1.04954	2.47469	1.23749	0.000272431	0.0261907	GO:0006810,GO:0006887,GO:0008150,GO:0009987,GO:0016192,GO:0032940,GO:0046903,GO:0051179,GO:0051234	K07195	Exocyst complex component EXO70A1 OS=Arabidopsis thaliana OX=3702 GN=EXO70A1 PE=1 SV=1
Sb03g31770	2.02674	7.00464	1.78915	0.000459222	0.0317755	GO:0005575,GO:0005622,GO:0005623,GO:0005737,GO:0009507,GO:0009532,GO:0009536,GO:0009570,GO:0043226,GO:0043227,GO:0043229,GO:0043231,GO:0044422,GO:0044424,GO:0044434,GO:0044435,GO:0044444,GO:0044446,GO:0044464	NOT SIGIFICANT	GDSL esterase/lipase LIP-4 OS=Arabidopsis thaliana OX=3702 GN=LIP4 PE=2 SV=1
Sb03g32320	4.74828	24.6875	2.37831	0.000965036	0.0427905	NOT SIGIFICANT	NOT SIGIFICANT	NOT SIGIFICANT
Sb03g34280	5.23159	0.204958	-4.67385	0.000115337	0.0187009	GO:0003674,GO:0003700,GO:0006355,GO:0008150,GO:0009889,GO:0010468,GO:0010556,GO:0019219,GO:0019222,GO:0031323,GO:0031326,GO:0050789,GO:0050794,GO:0051171,GO:0051252,GO:0060255,GO:0065007,GO:0080090,GO:0140110,GO:1903506,GO:2000112,GO:2001141	K08065	Nuclear transcription factor Y subunit B-8 OS=Arabidopsis thaliana OX=3702 GN=NFYB8 PE=1 SV=1
Sb03g34420	0.0105764	0.169493	4.00231	0.000428125	0.0310062	NOT SIGIFICANT	NOT SIGIFICANT	NOT SIGIFICANT
Sb03g34530	3.26802	12.7897	1.96849	0.00144744	0.0496035	GO:0005575,GO:0005622,GO:0005623,GO:0005737,GO:0005783,GO:0005788,GO:0005886,GO:0008150,GO:0012505,GO:0016020,GO:0031974,GO:0035821,GO:0043226,GO:0043227,GO:0043229,GO:0043231,GO:0043233,GO:0043900,GO:0043902,GO:0043903,GO:0044403,GO:0044419,GO:0044422,GO:0044424,GO:0044432,GO:0044444,GO:0044446,GO:0044464,GO:0044788,GO:0044794,GO:0048518,GO:0048524,GO:0050789,GO:0050792,GO:0051702,GO:0051704,GO:…	K09523	DnaJ protein P58IPK homolog OS=Arabidopsis thaliana OX=3702 GN=P58IPK PE=1 SV=1
Sb03g34680	2.31563	0.987481	-1.22958	0.000633139	0.0369791	NOT SIGIFICANT	NOT SIGIFICANT	Probable LRR receptor-like serine/threonine-protein kinase IRK OS=Arabidopsis thaliana OX=3702 GN=IRK PE=1 SV=1
Sb03g34830	2.34475	0.403056	-2.54038	0.00131549	0.048691	GO:0005575,GO:0005623,GO:0005886,GO:0016020,GO:0044464,GO:0071944	NOT SIGIFICANT	Probable inactive receptor kinase At5g58300 OS=Arabidopsis thaliana OX=3702 GN=At5g58300 PE=1 SV=1
Sb03g35240	3.16266	0.457278	-2.79	0.00137036	0.04897	NOT SIGIFICANT	NOT SIGIFICANT	NOT SIGIFICANT
Sb03g35930	14.1428	32.335	1.19303	0.00105336	0.0445259	GO:0003674,GO:0005488,GO:0005506,GO:0005575,GO:0005622,GO:0005623,GO:0005737,GO:0005739,GO:0005759,GO:0006790,GO:0006807,GO:0008150,GO:0008152,GO:0008198,GO:0009507,GO:0009526,GO:0009536,GO:0009941,GO:0009987,GO:0010467,GO:0016043,GO:0016226,GO:0019538,GO:0022607,GO:0031163,GO:0031967,GO:0031974,GO:0031975,GO:0043167,GO:0043169,GO:0043170,GO:0043226,GO:0043227,GO:0043229,GO:0043231,GO:0043233,GO:…	NOT SIGIFICANT	Uncharacterized protein At5g03900, chloroplastic OS=Arabidopsis thaliana OX=3702 GN=At5g03900 PE=2 SV=2
Sb03g36140	1.05756	4.58122	2.115	0.000585319	0.0356225	GO:0003674,GO:0003824,GO:0004497,GO:0005575,GO:0005622,GO:0005623,GO:0005737,GO:0006629,GO:0006720,GO:0006721,GO:0008150,GO:0008152,GO:0008299,GO:0008610,GO:0009058,GO:0009507,GO:0009526,GO:0009536,GO:0009941,GO:0009974,GO:0009987,GO:0016108,GO:0016109,GO:0016114,GO:0016116,GO:0016117,GO:0016491,GO:0016705,GO:0031967,GO:0031975,GO:0042440,GO:0043226,GO:0043227,GO:0043229,GO:0043231,GO:0044237,GO:…	K09837	Carotene epsilon-monooxygenase, chloroplastic OS=Arabidopsis thaliana OX=3702 GN=CYP97C1 PE=1 SV=1
Sb03g37460	0.761533	21.109	4.79281	3.02383e-05	0.0117319	GO:0003674,GO:0003824,GO:0004672,GO:0005575,GO:0005622,GO:0005623,GO:0005737,GO:0006464,GO:0006468,GO:0006793,GO:0006796,GO:0006807,GO:0007154,GO:0007165,GO:0008150,GO:0008152,GO:0009987,GO:0016301,GO:0016310,GO:0016740,GO:0016772,GO:0016773,GO:0019538,GO:0023052,GO:0035556,GO:0036211,GO:0043170,GO:0043412,GO:0044237,GO:0044238,GO:0044260,GO:0044267,GO:0044424,GO:0044464,GO:0050789,GO:0050794,GO:…	NOT SIGIFICANT	Serine/threonine/tyrosine-protein kinase HT1 OS=Arabidopsis thaliana OX=3702 GN=HT1 PE=1 SV=1
Sb03g37710	20.2588	47.2823	1.22275	1.24142e-06	0.00299693	GO:0000003,GO:0000151,GO:0001101,GO:0001558,GO:0001932,GO:0001934,GO:0003006,GO:0003674,GO:0005488,GO:0005515,GO:0005575,GO:0005622,GO:0005623,GO:0005737,GO:0006950,GO:0007154,GO:0007165,GO:0007275,GO:0008150,GO:0008361,GO:0009267,GO:0009605,GO:0009719,GO:0009790,GO:0009791,GO:0009793,GO:0009888,GO:0009893,GO:0009894,GO:0009987,GO:0009991,GO:0010033,GO:0010073,GO:0010074,GO:0010154,GO:0010243,GO:…	K07204	Regulatory-associated protein of TOR 1 OS=Arabidopsis thaliana OX=3702 GN=RAPTOR1 PE=1 SV=1
Sb03g38590	0.905322	0.01758	-5.68643	4.43715e-06	0.00602538	NOT SIGIFICANT	NOT SIGIFICANT	Protein root UVB sensitive 5 OS=Arabidopsis thaliana OX=3702 GN=RUS5 PE=2 SV=1
Sb03g38600	9.09642	23.271	1.35516	1.60394e-05	0.00995678	NOT SIGIFICANT	NOT SIGIFICANT	Protein root UVB sensitive 5 OS=Arabidopsis thaliana OX=3702 GN=RUS5 PE=2 SV=1
Sb03g39270	23.042	2.92556	-2.97748	3.69954e-06	0.00535866	GO:0001763,GO:0003674,GO:0003824,GO:0004175,GO:0004252,GO:0005575,GO:0005576,GO:0005618,GO:0005622,GO:0005623,GO:0005737,GO:0005773,GO:0005774,GO:0006508,GO:0006807,GO:0007275,GO:0007568,GO:0008150,GO:0008152,GO:0008233,GO:0008236,GO:0009505,GO:0009653,GO:0010016,GO:0010150,GO:0010223,GO:0010346,GO:0016020,GO:0016787,GO:0017171,GO:0019538,GO:0030312,GO:0031090,GO:0032501,GO:0032502,GO:0043170,GO:…	NOT SIGIFICANT	Subtilisin-like protease SBT1.4 OS=Arabidopsis thaliana OX=3702 GN=SBT1.4 PE=2 SV=1
Sb03g39860	0.213849	0.00982668	-4.44374	3.44044e-05	0.0115001	GO:0005575,GO:0005622,GO:0005623,GO:0005737,GO:0044424,GO:0044464	NOT SIGIFICANT	O-fucosyltransferase 19 OS=Arabidopsis thaliana OX=3702 GN=OFUT19 PE=2 SV=1
Sb03g39900	10.8182	2.5063	-2.10983	4.24531e-05	0.0116757	GO:0005575,GO:0005623,GO:0005886,GO:0016020,GO:0044464,GO:0071944	NOT SIGIFICANT	L-type lectin-domain containing receptor kinase VIII.2 OS=Arabidopsis thaliana OX=3702 GN=LECRK82 PE=2 SV=1
Sb03g40090	0.00948577	0.282383	4.89574	3.3371e-05	0.0116944	NOT SIGIFICANT	NOT SIGIFICANT	Copper transporter 2 OS=Arabidopsis thaliana OX=3702 GN=COPT2 PE=2 SV=1
Sb03g41450	2.66604	0.522748	-2.35051	0.000300994	0.0274778	NOT SIGIFICANT	NOT SIGIFICANT	NOT SIGIFICANT
Sb03g41980	0.00902284	0.168132	4.21987	3.8984e-07	0.00211752	NOT SIGIFICANT	NOT SIGIFICANT	Protein SPIRAL1-like 2 OS=Arabidopsis thaliana OX=3702 GN=SP1L2 PE=2 SV=1
Sb03g42010	7.83448	0.674515	-3.53791	0.000357579	0.0288815	GO:0002181,GO:0002183,GO:0005575,GO:0005622,GO:0005623,GO:0005737,GO:0005852,GO:0006412,GO:0006413,GO:0006518,GO:0006807,GO:0008150,GO:0008152,GO:0009058,GO:0009059,GO:0009987,GO:0010467,GO:0019538,GO:0032991,GO:0034641,GO:0034645,GO:0043043,GO:0043170,GO:0043603,GO:0043604,GO:0044237,GO:0044238,GO:0044249,GO:0044260,GO:0044267,GO:0044271,GO:0044424,GO:0044444,GO:0044464,GO:0071704,GO:1901564,GO:…	K15030	Eukaryotic translation initiation factor 3 subunit M OS=Dictyostelium discoideum OX=44689 GN=eif3m PE=1 SV=1
Sb03g42570	0.548322	4.02452	2.87572	9.78925e-05	0.0174337	GO:0000724,GO:0000725,GO:0005575,GO:0005622,GO:0005623,GO:0005737,GO:0006139,GO:0006259,GO:0006281,GO:0006302,GO:0006310,GO:0006725,GO:0006807,GO:0006950,GO:0006974,GO:0008150,GO:0008152,GO:0009507,GO:0009536,GO:0009987,GO:0033554,GO:0034641,GO:0043170,GO:0043226,GO:0043227,GO:0043229,GO:0043231,GO:0044237,GO:0044238,GO:0044260,GO:0044424,GO:0044444,GO:0044464,GO:0046483,GO:0050896,GO:0051716,GO:…	NOT SIGIFICANT	DNA repair RAD52-like protein 2, chloroplastic OS=Arabidopsis thaliana OX=3702 GN=RAD52-2 PE=1 SV=1
Sb04g00280	9.28206	32.6804	1.81591	0.000383553	0.0299765	NOT SIGIFICANT	NOT SIGIFICANT	NOT SIGIFICANT
Sb04g01810	58.8276	5.91432	-3.31421	0.000124114	0.0195408	NOT SIGIFICANT	K11001	NOT SIGIFICANT
Sb04g03210	17.8774	47.4523	1.40834	8.23278e-05	0.0161147	GO:0001558,GO:0008150,GO:0010769,GO:0022603,GO:0022604,GO:0040008,GO:0043900,GO:0045595,GO:0048638,GO:0050789,GO:0050793,GO:0050794,GO:0051128,GO:0051239,GO:0051510,GO:0060284,GO:0065007,GO:0080092,GO:2000241	K04730	Pollen receptor-like kinase 1 OS=Petunia integrifolia OX=4103 GN=PRK1 PE=1 SV=1
Sb04g03410	80.822	195.65	1.27546	0.00047039	0.032445	NOT SIGIFICANT	NOT SIGIFICANT	Triacylglycerol lipase OBL1 OS=Arabidopsis thaliana OX=3702 GN=OBL1 PE=1 SV=1
Sb04g04260	0.051285	126.347	11.2666	0.000737955	0.0388222	GO:0005575,GO:0005622,GO:0005623,GO:0005634,GO:0005737,GO:0005768,GO:0005773,GO:0005774,GO:0005794,GO:0005802,GO:0006873,GO:0006875,GO:0006878,GO:0006882,GO:0008150,GO:0009987,GO:0012505,GO:0016020,GO:0016021,GO:0019725,GO:0030003,GO:0031090,GO:0031224,GO:0031410,GO:0031982,GO:0031984,GO:0042592,GO:0043226,GO:0043227,GO:0043229,GO:0043231,GO:0044422,GO:0044424,GO:0044425,GO:0044431,GO:0044437,GO:…	K17086	Transmembrane 9 superfamily member 7 OS=Arabidopsis thaliana OX=3702 GN=TMN7 PE=2 SV=1
Sb04g04680	2.52427	0.332869	-2.92284	0.000952956	0.0425151	GO:0003674,GO:0003676,GO:0003723,GO:0003824,GO:0004518,GO:0004519,GO:0005488,GO:0005575,GO:0005622,GO:0005623,GO:0006139,GO:0006725,GO:0006807,GO:0008150,GO:0008152,GO:0009451,GO:0009987,GO:0016070,GO:0016787,GO:0016788,GO:0034641,GO:0043170,GO:0043226,GO:0043227,GO:0043229,GO:0043231,GO:0043412,GO:0044237,GO:0044238,GO:0044424,GO:0044464,GO:0046483,GO:0071704,GO:0090304,GO:0090305,GO:0097159,GO:…	NOT SIGIFICANT	Pentatricopeptide repeat-containing protein At1g80150, mitochondrial OS=Arabidopsis thaliana OX=3702 GN=At1g80150 PE=2 SV=2
Sb04g08270	225.548	31.885	-2.82248	0.000385289	0.0298971	GO:0001101,GO:0003674,GO:0003824,GO:0004497,GO:0006066,GO:0006082,GO:0006629,GO:0006694,GO:0006714,GO:0006720,GO:0006721,GO:0006950,GO:0007275,GO:0008150,GO:0008152,GO:0008202,GO:0008300,GO:0008610,GO:0009056,GO:0009058,GO:0009314,GO:0009414,GO:0009415,GO:0009416,GO:0009628,GO:0009639,GO:0009687,GO:0009987,GO:0010035,GO:0010268,GO:0010295,GO:0010817,GO:0016042,GO:0016054,GO:0016107,GO:0016115,GO:…	K07437	Abscisic acid 8'-hydroxylase 3 OS=Arabidopsis thaliana OX=3702 GN=CYP707A3 PE=1 SV=1
Sb04g09420	33.333	7.62473	-2.12819	0.00138488	0.0489256	NOT SIGIFICANT	NOT SIGIFICANT	F-box/kelch-repeat protein At3g06240 OS=Arabidopsis thaliana OX=3702 GN=At3g06240 PE=2 SV=1
Sb04g09560	7.37325	0.373318	-4.30382	0.00111167	0.0454863	GO:0000120,GO:0000500,GO:0005575,GO:0005622,GO:0005623,GO:0005634,GO:0005667,GO:0005730,GO:0006355,GO:0006356,GO:0008150,GO:0009889,GO:0009891,GO:0009893,GO:0010468,GO:0010556,GO:0010557,GO:0010604,GO:0010628,GO:0019219,GO:0019222,GO:0031323,GO:0031325,GO:0031326,GO:0031328,GO:0031974,GO:0031981,GO:0032991,GO:0043226,GO:0043227,GO:0043228,GO:0043229,GO:0043231,GO:0043232,GO:0043233,GO:0044422,GO:…	K15223	Upstream activation factor subunit UAF30 OS=Saccharomyces cerevisiae (strain ATCC 204508 / S288c) OX=559292 GN=UAF30 PE=1 SV=1
Sb04g09680	1.43242	4.57148	1.67421	0.00113619	0.0457147	NOT SIGIFICANT	NOT SIGIFICANT	Uncharacterized WD repeat-containing protein C2A9.03 OS=Schizosaccharomyces pombe (strain 972 / ATCC 24843) OX=284812 GN=SPBC2A9.03 PE=4 SV=2
Sb04g10070	38.6233	15.4353	-1.32324	0.00101189	0.0439708	NOT SIGIFICANT	K12606	CCR4-NOT transcription complex subunit 9 OS=Xenopus tropicalis OX=8364 GN=cnot9 PE=2 SV=1
Sb04g10170	12.4922	6.16257	-1.01942	0.00102695	0.0439223	NOT SIGIFICANT	NOT SIGIFICANT	NOT SIGIFICANT
Sb04g11640	1.79968	13.7923	2.93806	0.000156581	0.0220912	NOT SIGIFICANT	NOT SIGIFICANT	Putative RNA-binding protein YlmH OS=Bacillus subtilis (strain 168) OX=224308 GN=ylmH PE=4 SV=1
Sb04g12240	4.24086	0.0102294	-8.69549	0.000884464	0.0409739	NOT SIGIFICANT	NOT SIGIFICANT	NOT SIGIFICANT
Sb04g12520	18.8008	0.096984	-7.59883	0.00012302	0.0195099	GO:0003674,GO:0003676,GO:0003677,GO:0003700,GO:0005488,GO:0006355,GO:0008150,GO:0009314,GO:0009416,GO:0009628,GO:0009637,GO:0009642,GO:0009646,GO:0009889,GO:0010468,GO:0010556,GO:0019219,GO:0019222,GO:0031323,GO:0031326,GO:0043565,GO:0050789,GO:0050794,GO:0050896,GO:0051171,GO:0051252,GO:0060255,GO:0065007,GO:0080090,GO:0097159,GO:0140110,GO:1901363,GO:1903506,GO:2000112,GO:2001141	NOT SIGIFICANT	Homeobox-leucine zipper protein ATHB-52 OS=Arabidopsis thaliana OX=3702 GN=ATHB-52 PE=2 SV=1
Sb04g12870	41.7955	12.4666	-1.74528	6.57318e-05	0.0144258	NOT SIGIFICANT	NOT SIGIFICANT	NOT SIGIFICANT
Sb04g15120	12.3444	33.829	1.4544	1.57745e-05	0.0107104	GO:0000302,GO:0005575,GO:0005622,GO:0005623,GO:0005737,GO:0005739,GO:0006950,GO:0006979,GO:0008150,GO:0009987,GO:0030154,GO:0032502,GO:0033554,GO:0034599,GO:0034614,GO:0042221,GO:0043226,GO:0043227,GO:0043229,GO:0043231,GO:0043473,GO:0044424,GO:0044444,GO:0044464,GO:0048066,GO:0048869,GO:0050896,GO:0050931,GO:0050935,GO:0051716,GO:0070887,GO:1901700,GO:1901701	K13348	Protein SYM1 OS=Ustilago maydis (strain 521 / FGSC 9021) OX=237631 GN=SYM1 PE=3 SV=1
Sb04g15590	9.28635	0.0105702	-9.77897	0.000179444	0.0227999	GO:0005575,GO:0005622,GO:0005623,GO:0005737,GO:0005768,GO:0005773,GO:0005886,GO:0006810,GO:0006888,GO:0008150,GO:0012505,GO:0016020,GO:0016192,GO:0030100,GO:0031410,GO:0031982,GO:0032879,GO:0043226,GO:0043227,GO:0043229,GO:0043231,GO:0044424,GO:0044444,GO:0044464,GO:0046907,GO:0048193,GO:0050789,GO:0050794,GO:0051049,GO:0051128,GO:0051179,GO:0051234,GO:0051641,GO:0051649,GO:0060627,GO:0065007,GO:…	K07877	Ras-related protein RABB1c OS=Arabidopsis thaliana OX=3702 GN=RABB1C PE=1 SV=1
Sb04g15890	3.05909	7.51069	1.29584	3.0466e-05	0.0114127	NOT SIGIFICANT	NOT SIGIFICANT	NOT SIGIFICANT
Sb04g18250	3.62381	19.6267	2.43724	0.000900117	0.0410858	GO:0000003,GO:0003006,GO:0003674,GO:0003700,GO:0005575,GO:0005622,GO:0005623,GO:0005634,GO:0006355,GO:0007275,GO:0008150,GO:0009555,GO:0009790,GO:0009791,GO:0009793,GO:0009889,GO:0010154,GO:0010468,GO:0010556,GO:0019219,GO:0019222,GO:0022414,GO:0031323,GO:0031326,GO:0032501,GO:0032502,GO:0043226,GO:0043227,GO:0043229,GO:0043231,GO:0044424,GO:0044464,GO:0048229,GO:0048316,GO:0048608,GO:0048731,GO:…	NOT SIGIFICANT	Probable WRKY transcription factor 14 OS=Arabidopsis thaliana OX=3702 GN=WRKY14 PE=2 SV=2
Sb04g18320	4.89058	26.5997	2.44333	0.000760229	0.039141	NOT SIGIFICANT	K01188	Beta-glucosidase 12 OS=Oryza sativa subsp. indica OX=39946 GN=BGLU12 PE=3 SV=1	水解类黄酮苷的糖苷酶
Sb04g18400	25.9401	9.87968	-1.39265	4.11161e-05	0.012072	GO:0003674,GO:0005096,GO:0005488,GO:0005543,GO:0005575,GO:0005622,GO:0005623,GO:0005737,GO:0005773,GO:0005794,GO:0005886,GO:0006810,GO:0006886,GO:0007275,GO:0008047,GO:0008104,GO:0008150,GO:0008289,GO:0009555,GO:0012505,GO:0015031,GO:0015833,GO:0016020,GO:0030234,GO:0030695,GO:0032501,GO:0032502,GO:0033036,GO:0034613,GO:0042886,GO:0043085,GO:0043087,GO:0043167,GO:0043168,GO:0043226,GO:0043227,GO:…	K12486	ADP-ribosylation factor GTPase-activating protein AGD12 OS=Arabidopsis thaliana OX=3702 GN=AGD12 PE=1 SV=1
Sb04g19790	0.0108382	1.82894	7.39874	0.000166047	0.0225481	NOT SIGIFICANT	NOT SIGIFICANT	F-box protein At5g46170 OS=Arabidopsis thaliana OX=3702 GN=At5g46170 PE=2 SV=1
Sb04g20530	2.99861	1.0308	-1.54053	0.000793994	0.0400258	GO:0003674,GO:0003824,GO:0004672,GO:0004674,GO:0004675,GO:0004888,GO:0005575,GO:0005623,GO:0005886,GO:0006464,GO:0006468,GO:0006793,GO:0006796,GO:0006807,GO:0007154,GO:0007165,GO:0007166,GO:0007167,GO:0007178,GO:0008150,GO:0008152,GO:0009987,GO:0016020,GO:0016301,GO:0016310,GO:0016740,GO:0016772,GO:0016773,GO:0019199,GO:0019538,GO:0023052,GO:0036211,GO:0038023,GO:0043170,GO:0043412,GO:0044237,GO:…	NOT SIGIFICANT	Protein STRUBBELIG-RECEPTOR FAMILY 8 OS=Arabidopsis thaliana OX=3702 GN=SRF8 PE=1 SV=1
Sb04g20620	0.0106431	0.277984	4.70701	1.97062e-05	0.00995715	NOT SIGIFICANT	K02887	50S ribosomal protein L20 OS=Rhodospirillum centenum (strain ATCC 51521 / SW) OX=414684 GN=rplT PE=3 SV=1
Sb04g21090	6.68275	0.122479	-5.76984	0.000171671	0.0224692	NOT SIGIFICANT	NOT SIGIFICANT	Homeobox-leucine zipper protein ROC3 OS=Oryza sativa subsp. indica OX=39946 GN=ROC3 PE=3 SV=2
Sb04g21550	0.837922	4.13249	2.30212	0.00111218	0.0454217	GO:0005575,GO:0005622,GO:0005623,GO:0005634,GO:0043226,GO:0043227,GO:0043229,GO:0043231,GO:0044424,GO:0044464	K12127	Two-component response regulator-like PRR1 OS=Oryza sativa subsp. japonica OX=39947 GN=PRR1 PE=1 SV=2
Sb04g21810	0.0104774	6.33367	9.23961	3.0386e-05	0.0115824	NOT SIGIFICANT	NOT SIGIFICANT	GDSL esterase/lipase At1g74460 OS=Arabidopsis thaliana OX=3702 GN=At1g74460 PE=2 SV=1
Sb04g21880	2.34946	0.00983664	-7.89995	0.000355911	0.028854	NOT SIGIFICANT	NOT SIGIFICANT	Probable arabinosyltransferase ARAD1 OS=Arabidopsis thaliana OX=3702 GN=ARAD1 PE=1 SV=1	疑似果胶合成酶
Sb04g22950	24.0691	6.79829	-1.82394	0.000642383	0.0373183	NOT SIGIFICANT	NOT SIGIFICANT	B3 domain-containing protein At4g01580 OS=Arabidopsis thaliana OX=3702 GN=At4g01580 PE=2 SV=1
Sb04g23230	0.00651437	0.36234	5.79758	0.00135963	0.0488276	NOT SIGIFICANT	NOT SIGIFICANT	Phosphatidylinositol/phosphatidylcholine transfer protein SFH2 OS=Arabidopsis thaliana OX=3702 GN=SFH2 PE=3 SV=1
Sb05g00720	9.28438	0.332489	-4.80343	0.000976601	0.0431272	NOT SIGIFICANT	NOT SIGIFICANT	NOT SIGIFICANT
Sb05g01770	2.73086	0.00946592	-8.1724	2.58699e-06	0.00510977	NOT SIGIFICANT	NOT SIGIFICANT	NOT SIGIFICANT
Sb05g01830	4.71992	1.2253	-1.94563	0.0013224	0.0485334	GO:0003674,GO:0003824,GO:0005488,GO:0016829,GO:0020037,GO:0033218,GO:0042277,GO:0043167,GO:0043168,GO:0043295,GO:0046906,GO:0048037,GO:0072341,GO:0097159,GO:1900750,GO:1901363,GO:1901681	K05309	Prostaglandin E synthase 2 OS=Danio rerio OX=7955 GN=ptges2 PE=2 SV=1
Sb05g01850	25.7078	1.71165	-3.90875	3.67336e-05	0.0119121	NOT SIGIFICANT	K07953	GTP-binding protein SAR1A OS=Arabidopsis thaliana OX=3702 GN=SAR1A PE=2 SV=1
Sb05g02460	0.720139	2.98058	2.04925	9.39987e-05	0.0173077	NOT SIGIFICANT	NOT SIGIFICANT	Protein FAM91A1 OS=Danio rerio OX=7955 GN=fam91a1 PE=2 SV=2
Sb05g02520	14.3097	0.00927667	-10.5911	0.000571828	0.0350964	NOT SIGIFICANT	K18195	Rhamnogalacturonate lyase OS=Dickeya dadantii (strain 3937) OX=198628 GN=rhiE PE=1 SV=1
Sb05g02570	44.2712	134.587	1.6041	1.05464e-05	0.00954761	GO:0000228,GO:0000785,GO:0000790,GO:0003674,GO:0003676,GO:0003677,GO:0005488,GO:0005575,GO:0005622,GO:0005623,GO:0005634,GO:0005694,GO:0006325,GO:0006342,GO:0006355,GO:0006996,GO:0008150,GO:0009889,GO:0009890,GO:0009892,GO:0009987,GO:0010468,GO:0010556,GO:0010558,GO:0010605,GO:0010629,GO:0016043,GO:0016458,GO:0019219,GO:0019222,GO:0031323,GO:0031324,GO:0031326,GO:0031327,GO:0031974,GO:0031981,GO:…	K11251	Probable histone H2A.4 OS=Arabidopsis thaliana OX=3702 GN=At5g02560 PE=1 SV=1
Sb05g02690	0.0271419	2.87261	6.72569	0.000710528	0.0383068	GO:0005575,GO:0005618,GO:0005622,GO:0005623,GO:0005737,GO:0005794,GO:0008150,GO:0009505,GO:0009719,GO:0009725,GO:0009741,GO:0010033,GO:0012505,GO:0014070,GO:0030312,GO:0033993,GO:0042221,GO:0043226,GO:0043227,GO:0043229,GO:0043231,GO:0044424,GO:0044444,GO:0044464,GO:0050896,GO:0071944,GO:1901700	NOT SIGIFICANT	Protein PHOSPHATE-INDUCED 1 OS=Nicotiana tabacum OX=4097 GN=PHI-1 PE=2 SV=1
Sb05g02870	1.58063	0.00955297	-7.37034	0.000135367	0.0205673	NOT SIGIFICANT	NOT SIGIFICANT	NOT SIGIFICANT
Sb05g03700	0.109067	13.8895	6.99263	5.47572e-06	0.0069983	NOT SIGIFICANT	NOT SIGIFICANT	Pentatricopeptide repeat-containing protein At1g19720 OS=Arabidopsis thaliana OX=3702 GN=DYW7 PE=2 SV=1
Sb05g03750	3.01153	13.8991	2.20642	0.000795636	0.0399233	GO:0000226,GO:0000278,GO:0000902,GO:0003674,GO:0005488,GO:0005515,GO:0005575,GO:0005622,GO:0005623,GO:0005737,GO:0005819,GO:0005856,GO:0005874,GO:0005876,GO:0005886,GO:0005911,GO:0005938,GO:0006996,GO:0007010,GO:0007017,GO:0007020,GO:0007026,GO:0007049,GO:0008017,GO:0008092,GO:0008150,GO:0009506,GO:0009524,GO:0009653,GO:0009826,GO:0009987,GO:0010639,GO:0015630,GO:0015631,GO:0016020,GO:0016043,GO:…	K16578	CLIP-associated protein OS=Arabidopsis thaliana OX=3702 GN=CLASP PE=1 SV=1
Sb05g04180	1.18138	6.9446	2.55541	0.00116621	0.0461536	GO:0000981,GO:0000988,GO:0000989,GO:0001067,GO:0001076,GO:0001101,GO:0001134,GO:0001135,GO:0003674,GO:0003676,GO:0003677,GO:0003700,GO:0005488,GO:0005575,GO:0005622,GO:0005623,GO:0005634,GO:0006355,GO:0006357,GO:0008150,GO:0009719,GO:0009725,GO:0009751,GO:0009889,GO:0009987,GO:0010033,GO:0010468,GO:0010556,GO:0014070,GO:0019219,GO:0019222,GO:0030154,GO:0031323,GO:0031326,GO:0032502,GO:0042221,GO:…	K09422	Transcription factor MYB36 OS=Arabidopsis thaliana OX=3702 GN=MYB36 PE=1 SV=1	细胞分化的关键正调控因子
Sb05g04330	10.1158	52.9553	2.38816	3.17717e-05	0.0115051	NOT SIGIFICANT	NOT SIGIFICANT	NOT SIGIFICANT
Sb05g04390	2.04803	7.93307	1.95365	0.000954479	0.0424089	NOT SIGIFICANT	NOT SIGIFICANT	NOT SIGIFICANT
Sb05g05280	0.00534083	2.04442	8.58041	0.000529401	0.0339301	GO:0000255,GO:0000256,GO:0003674,GO:0003824,GO:0004848,GO:0005488,GO:0005515,GO:0005575,GO:0005622,GO:0005623,GO:0005737,GO:0005783,GO:0006139,GO:0006144,GO:0006145,GO:0006725,GO:0006807,GO:0008150,GO:0008152,GO:0009056,GO:0009112,GO:0009987,GO:0010135,GO:0010136,GO:0012505,GO:0016787,GO:0016810,GO:0016813,GO:0017144,GO:0019439,GO:0034641,GO:0042737,GO:0042802,GO:0043226,GO:0043227,GO:0043229,GO:…	K18151	Ureidoglycolate hydrolase OS=Arabidopsis thaliana OX=3702 GN=UAH PE=1 SV=1
Sb05g05420	1.11243	2.58881	1.21858	0.000122854	0.0196268	NOT SIGIFICANT	K17508	Probable protein phosphatase 2C 55 OS=Arabidopsis thaliana OX=3702 GN=At4g16580 PE=2 SV=2
Sb05g06080	0.223206	15.8733	6.15209	0.00145753	0.0495582	GO:0003674,GO:0003824,GO:0004497,GO:0006629,GO:0006694,GO:0007275,GO:0008150,GO:0008152,GO:0008202,GO:0008610,GO:0009058,GO:0010268,GO:0010295,GO:0010817,GO:0016125,GO:0016128,GO:0016129,GO:0016131,GO:0016132,GO:0016491,GO:0016705,GO:0016709,GO:0032501,GO:0032502,GO:0042445,GO:0042446,GO:0042592,GO:0044238,GO:0048856,GO:0048878,GO:0055088,GO:0055114,GO:0065007,GO:0065008,GO:0071704,GO:1901360,GO:…	K09843	Abscisic acid 8'-hydroxylase CYP707A1 OS=Solanum lycopersicum OX=4081 GN=CYP707A1 PE=2 SV=1
Sb05g06510	14.1798	3.92517	-1.85301	3.86043e-05	0.0119822	NOT SIGIFICANT	NOT SIGIFICANT	NOT SIGIFICANT
Sb05g09770	20.8636	48.3069	1.21124	0.000142956	0.0211292	NOT SIGIFICANT	NOT SIGIFICANT	Gibberellin 20 oxidase 2 OS=Oryza sativa subsp. japonica OX=39947 GN=GA20OX2 PE=2 SV=1
Sb05g09900	2.20945	0.55685	-1.98833	8.02759e-05	0.0158559	GO:0003674,GO:0003824,GO:0004017,GO:0005575,GO:0005622,GO:0005623,GO:0005737,GO:0006139,GO:0006725,GO:0006753,GO:0006793,GO:0006796,GO:0006807,GO:0008150,GO:0008152,GO:0009058,GO:0009117,GO:0009123,GO:0009165,GO:0009507,GO:0009532,GO:0009536,GO:0009570,GO:0009987,GO:0016301,GO:0016310,GO:0016740,GO:0016772,GO:0016776,GO:0018130,GO:0019205,GO:0019438,GO:0019637,GO:0032501,GO:0034641,GO:0034654,GO:…	K00939	Adenylate kinase 2, chloroplastic OS=Arabidopsis thaliana OX=3702 GN=At5g47840 PE=1 SV=1
Sb05g10320	3.44749	1.57861	-1.12689	8.38758e-05	0.0161272	NOT SIGIFICANT	NOT SIGIFICANT	GRAS family protein RAM1 OS=Medicago truncatula OX=3880 GN=RAM1 PE=1 SV=1
Sb05g10900	0.317011	1.21672	1.94039	1.58412e-05	0.0104298	NOT SIGIFICANT	K21373	7-deoxyloganetic acid glucosyltransferase OS=Catharanthus roseus OX=4058 GN=UGT709C2 PE=1 SV=1
Sb05g11250	2.26728	4.83121	1.09142	0.000990605	0.0433929	GO:0003333,GO:0003674,GO:0005215,GO:0005342,GO:0005575,GO:0005622,GO:0005623,GO:0005737,GO:0005886,GO:0005887,GO:0005938,GO:0006810,GO:0006811,GO:0006820,GO:0006865,GO:0007154,GO:0007165,GO:0008150,GO:0008509,GO:0008514,GO:0009719,GO:0009725,GO:0009733,GO:0009734,GO:0009755,GO:0009987,GO:0010033,GO:0015075,GO:0015171,GO:0015179,GO:0015318,GO:0015562,GO:0015711,GO:0015807,GO:0015849,GO:0016020,GO:…	NOT SIGIFICANT	WAT1-related protein At1g21890 OS=Arabidopsis thaliana OX=3702 GN=At1g21890 PE=2 SV=1
Sb05g11870	18.3415	40.2	1.13209	0.000858603	0.0409997	NOT SIGIFICANT	NOT SIGIFICANT	ATP synthase subunit a OS=Vicia faba OX=3906 GN=ATP6 PE=3 SV=1
Sb05g13580	4.44554	13.6584	1.61936	0.000268425	0.0262705	NOT SIGIFICANT	NOT SIGIFICANT	NOT SIGIFICANT
Sb05g14550	3.21072	0.56349	-2.51043	0.000388508	0.029933	NOT SIGIFICANT	K16670	Homeobox protein knotted-1-like 2 OS=Malus domestica OX=3750 PE=2 SV=1
Sb05g14830	1.39032	13.9303	3.32473	0.0010334	0.0439389	NOT SIGIFICANT	NOT SIGIFICANT	NOT SIGIFICANT
Sb05g14840	4.68072	0.00902817	-9.01808	3.05428e-06	0.00474002	NOT SIGIFICANT	NOT SIGIFICANT	AT-rich interactive domain-containing protein 4 OS=Arabidopsis thaliana OX=3702 GN=ARID4 PE=1 SV=1
Sb05g15180	5.79403	2.48311	-1.22242	0.000110764	0.0185121	NOT SIGIFICANT	K06199	Fluoride export protein 2 OS=Schizosaccharomyces pombe (strain 972 / ATCC 24843) OX=284812 GN=fex2 PE=3 SV=1
Sb06g00340	3.64842	0.0533039	-6.09689	0.000756625	0.0392343	GO:0003674,GO:0003676,GO:0003723,GO:0003729,GO:0005488,GO:0005575,GO:0005622,GO:0005623,GO:0005737,GO:0006464,GO:0006508,GO:0006807,GO:0006914,GO:0008150,GO:0008152,GO:0009056,GO:0009987,GO:0010494,GO:0016236,GO:0016579,GO:0019538,GO:0032386,GO:0032879,GO:0032991,GO:0034517,GO:0035770,GO:0035973,GO:0036211,GO:0036464,GO:0043021,GO:0043170,GO:0043226,GO:0043228,GO:0043229,GO:0043232,GO:0043412,GO:…	NOT SIGIFICANT	Nuclear transport factor 2 OS=Arabidopsis thaliana OX=3702 GN=NTF2 PE=1 SV=1
Sb06g02220	4.75866	0.026941	-7.46461	0.000147721	0.0213969	NOT SIGIFICANT	NOT SIGIFICANT	NOT SIGIFICANT
Sb06g02340	27.4852	12.7751	-1.10532	0.00108378	0.0452832	NOT SIGIFICANT	NOT SIGIFICANT	NOT SIGIFICANT
Sb06g02390	18.5101	4.91433	-1.91325	7.55156e-06	0.00863541	NOT SIGIFICANT	K11982	E3 ubiquitin-protein ligase RNF181 OS=Xenopus laevis OX=8355 GN=rnf181 PE=2 SV=1
Sb06g02560	5.741	17.4876	1.60696	0.0002899	0.0271494	GO:0003674,GO:0003824,GO:0005575,GO:0005623,GO:0005886,GO:0008150,GO:0008152,GO:0016020,GO:0016491,GO:0016705,GO:0016706,GO:0044464,GO:0048244,GO:0051213,GO:0055114,GO:0071944	K00477	Phytanoyl-CoA dioxygenase 2 OS=Oryza sativa subsp. japonica OX=39947 GN=Os05g0473900 PE=2 SV=1
Sb06g03330	0.00998843	15.0554	10.5577	0.00119417	0.0464977	GO:0005575,GO:0005622,GO:0005623,GO:0005634,GO:0006139,GO:0006351,GO:0006725,GO:0006807,GO:0008150,GO:0008152,GO:0009058,GO:0009059,GO:0009299,GO:0009314,GO:0009416,GO:0009628,GO:0009653,GO:0009987,GO:0010467,GO:0016070,GO:0016071,GO:0018130,GO:0019438,GO:0032502,GO:0032774,GO:0034641,GO:0034645,GO:0034654,GO:0043170,GO:0043226,GO:0043227,GO:0043229,GO:0043231,GO:0044237,GO:0044238,GO:0044249,GO:…	NOT SIGIFICANT	Protein LIGHT-DEPENDENT SHORT HYPOCOTYLS 3 OS=Arabidopsis thaliana OX=3702 GN=LSH3 PE=1 SV=1
Sb06g04050	12.4715	5.28363	-1.23903	0.00137359	0.0489245	NOT SIGIFICANT	K17972	N-terminal acetyltransferase B complex catalytic subunit NAA20 OS=Arabidopsis thaliana OX=3702 GN=NAA20 PE=1 SV=1
Sb06g04280	9.85934	46.1366	2.22635	0.000163904	0.0223971	GO:0003674,GO:0003824,GO:0005215,GO:0005575,GO:0005622,GO:0005623,GO:0005737,GO:0005773,GO:0005774,GO:0005794,GO:0005886,GO:0006810,GO:0006811,GO:0008150,GO:0012505,GO:0015075,GO:0015399,GO:0015405,GO:0016020,GO:0016462,GO:0016787,GO:0016817,GO:0016818,GO:0016887,GO:0017111,GO:0022804,GO:0022853,GO:0022857,GO:0031090,GO:0034220,GO:0042623,GO:0042625,GO:0042626,GO:0043226,GO:0043227,GO:0043229,GO:…	K02151	V-type proton ATPase subunit F OS=Arabidopsis thaliana OX=3702 GN=VHA-F PE=2 SV=1
Sb06g04490	15.2981	6.01917	-1.34572	0.00023179	0.0244471	GO:0001101,GO:0003674,GO:0005215,GO:0005315,GO:0005575,GO:0005622,GO:0005623,GO:0005634,GO:0005737,GO:0005773,GO:0005794,GO:0005886,GO:0005887,GO:0005911,GO:0006810,GO:0006811,GO:0006820,GO:0008150,GO:0008509,GO:0009506,GO:0009719,GO:0009725,GO:0009737,GO:0010033,GO:0012505,GO:0015075,GO:0015291,GO:0015318,GO:0016020,GO:0016021,GO:0022804,GO:0022857,GO:0030054,GO:0031224,GO:0031226,GO:0033993,GO:…	K08176	Probable inorganic phosphate transporter 1-7 OS=Arabidopsis thaliana OX=3702 GN=PHT1-7 PE=2 SV=2
Sb06g05720	0.0273268	5.5077	7.65499	8.37802e-05	0.0162526	GO:0006082,GO:0006629,GO:0006720,GO:0006721,GO:0008150,GO:0008152,GO:0009685,GO:0009987,GO:0010817,GO:0016101,GO:0019752,GO:0042445,GO:0043436,GO:0044237,GO:0044238,GO:0044255,GO:0044281,GO:0065007,GO:0065008,GO:0071704	K04120	Kolavenyl diphosphate synthase TPS5, chloroplastic OS=Vitex agnus-castus OX=54477 GN=TPS5 PE=1 SV=1
Sb06g06020	6.26297	23.0766	1.88151	0.000676461	0.0382747	GO:0003674,GO:0003824,GO:0005575,GO:0005622,GO:0005623,GO:0005737,GO:0005829,GO:0008150,GO:0009987,GO:0016462,GO:0016787,GO:0016817,GO:0016818,GO:0042221,GO:0044424,GO:0044444,GO:0044464,GO:0050896,GO:0051716,GO:0052751,GO:0060359,GO:0070887,GO:0071242,GO:1901698,GO:1901699	NOT SIGIFICANT	Nudix hydrolase 9 OS=Arabidopsis thaliana OX=3702 GN=NUDT9 PE=2 SV=1
Sb06g08070	4.00144	1.36489	-1.55173	0.000271343	0.026202	GO:0000311,GO:0000313,GO:0000315,GO:0003674,GO:0003676,GO:0003723,GO:0003727,GO:0003735,GO:0005198,GO:0005488,GO:0005575,GO:0005622,GO:0005623,GO:0005634,GO:0005737,GO:0005829,GO:0005840,GO:0006412,GO:0006518,GO:0006807,GO:0008150,GO:0008152,GO:0008187,GO:0008266,GO:0009058,GO:0009059,GO:0009507,GO:0009532,GO:0009534,GO:0009535,GO:0009536,GO:0009547,GO:0009570,GO:0009579,GO:0009987,GO:0010467,GO:…	K02926	50S ribosomal protein L4, chloroplastic OS=Nicotiana tabacum OX=4097 GN=RPL4 PE=2 SV=1
Sb06g08700	0.422836	1.15472	1.44937	0.00139389	0.0489256	NOT SIGIFICANT	NOT SIGIFICANT	Chitinase 2 OS=Tulipa saxatilis subsp. bakeri OX=110455 PE=1 SV=1
Sb06g09690	1.01342	5.66673	2.48329	0.000738215	0.038742	NOT SIGIFICANT	NOT SIGIFICANT	NOT SIGIFICANT
Sb06g10130	0.00998023	0.917779	6.52293	0.000127215	0.0197429	GO:0000302,GO:0001101,GO:0002831,GO:0005575,GO:0005622,GO:0005623,GO:0005634,GO:0005737,GO:0005739,GO:0005829,GO:0006950,GO:0006970,GO:0006979,GO:0007154,GO:0007275,GO:0007568,GO:0008150,GO:0009266,GO:0009314,GO:0009409,GO:0009414,GO:0009415,GO:0009416,GO:0009605,GO:0009607,GO:0009611,GO:0009620,GO:0009625,GO:0009628,GO:0009636,GO:0009642,GO:0009646,GO:0009651,GO:0009719,GO:0009723,GO:0009725,GO:…	NOT SIGIFICANT	Protein SENESCENCE-ASSOCIATED GENE 21, mitochondrial OS=Arabidopsis thaliana OX=3702 GN=SAG21 PE=2 SV=1
Sb06g11000	4.10338	1.12347	-1.86885	0.000363937	0.029178	NOT SIGIFICANT	NOT SIGIFICANT	NOT SIGIFICANT
Sb06g11490	1.75238	5.74271	1.71242	0.00110897	0.0455473	GO:0000003,GO:0003006,GO:0003674,GO:0003824,GO:0004842,GO:0005575,GO:0005622,GO:0005623,GO:0005634,GO:0005737,GO:0006355,GO:0006464,GO:0006807,GO:0006950,GO:0007275,GO:0008150,GO:0008152,GO:0009266,GO:0009409,GO:0009628,GO:0009791,GO:0009889,GO:0009890,GO:0009892,GO:0009966,GO:0009987,GO:0010228,GO:0010468,GO:0010556,GO:0010558,GO:0010605,GO:0010629,GO:0010646,GO:0016567,GO:0016740,GO:0019219,GO:…	K16278	E3 ubiquitin-protein ligase HOS1 OS=Arabidopsis thaliana OX=3702 GN=HOS1 PE=1 SV=1
Sb06g12990	5.66668	1.8766	-1.59439	0.000805011	0.0397511	NOT SIGIFICANT	NOT SIGIFICANT	Uncharacterized protein At5g01610 OS=Arabidopsis thaliana OX=3702 GN=At5g01610 PE=1 SV=1
Sb06g13550	3.19612	0.700208	-2.19047	0.00122387	0.0467328	NOT SIGIFICANT	K20353	Protein transport protein SEC16B homolog OS=Arabidopsis thaliana OX=3702 GN=SEC16B PE=1 SV=1
Sb06g14120	1.10608	0.171784	-2.68679	0.000235773	0.0245103	GO:0005575,GO:0008150,GO:0008152,GO:0009058,GO:0009719,GO:0009725,GO:0009733,GO:0010033,GO:0016020,GO:0019748,GO:0042221,GO:0044550,GO:0050896	K00512	Ferruginol synthase OS=Salvia fruticosa OX=268906 GN=CYP76AH24 PE=1 SV=1
Sb06g16350	7.86776	1.03984	-2.91959	0.00133003	0.0485673	NOT SIGIFICANT	NOT SIGIFICANT	NOT SIGIFICANT
Sb06g19260	5.53171	12.1603	1.13638	0.000394955	0.0298996	NOT SIGIFICANT	NOT SIGIFICANT	NOT SIGIFICANT
Sb06g20080	0.334033	6.08747	4.18778	0.000671894	0.0383156	NOT SIGIFICANT	NOT SIGIFICANT	Non-specific lipid-transfer protein 1 OS=Foeniculum vulgare OX=2849586 PE=1 SV=1
Sb06g23550	0.00951704	3.08389	8.34002	0.000328317	0.0283069	NOT SIGIFICANT	NOT SIGIFICANT	Phosphoribosylaminoimidazole-succinocarboxamide synthase, chloroplastic OS=Arabidopsis thaliana OX=3702 GN=PUR7 PE=2 SV=2
Sb06g23610	50.8183	18.8864	-1.428	0.000227822	0.0245043	GO:0003674,GO:0003676,GO:0003700,GO:0003723,GO:0003729,GO:0003730,GO:0005488,GO:0005575,GO:0005622,GO:0005623,GO:0005737,GO:0005829,GO:0006355,GO:0006417,GO:0008150,GO:0009889,GO:0009890,GO:0009892,GO:0009893,GO:0009894,GO:0009896,GO:0010468,GO:0010556,GO:0010558,GO:0010604,GO:0010605,GO:0010608,GO:0010629,GO:0017148,GO:0019219,GO:0019222,GO:0031323,GO:0031324,GO:0031325,GO:0031326,GO:0031327,GO:…	NOT SIGIFICANT	Zinc finger CCCH domain-containing protein 56 OS=Oryza sativa subsp. japonica OX=39947 GN=Os08g0159800 PE=4 SV=1
Sb06g24130	208.378	435.008	1.06184	2.93798e-05	0.0116061	GO:0003674,GO:0005215,GO:0005575,GO:0005622,GO:0005623,GO:0005737,GO:0005739,GO:0005740,GO:0005743,GO:0006810,GO:0006950,GO:0006979,GO:0008150,GO:0008381,GO:0009507,GO:0009526,GO:0009536,GO:0009941,GO:0009987,GO:0015267,GO:0016020,GO:0019866,GO:0022803,GO:0022836,GO:0022857,GO:0031090,GO:0031966,GO:0031967,GO:0031975,GO:0033554,GO:0034599,GO:0042221,GO:0043226,GO:0043227,GO:0043229,GO:0043231,GO:…	K22047	Mechanosensitive ion channel protein 1, mitochondrial OS=Arabidopsis thaliana OX=3702 GN=MSL1 PE=1 SV=1
Sb06g24300	0.100612	0.423229	2.07263	0.00112861	0.0457486	GO:0005575,GO:0005576,GO:0005622,GO:0005623,GO:0005737,GO:0005829,GO:0005886,GO:0006950,GO:0006952,GO:0008150,GO:0009314,GO:0009416,GO:0009605,GO:0009607,GO:0009611,GO:0009620,GO:0009628,GO:0009642,GO:0009644,GO:0016020,GO:0043207,GO:0044424,GO:0044444,GO:0044464,GO:0048046,GO:0050832,GO:0050896,GO:0051704,GO:0051707,GO:0071944,GO:0098542	NOT SIGIFICANT	Desiccation-related protein PCC27-45 OS=Craterostigma plantagineum OX=4153 PE=2 SV=1
Sb06g24680	56.5656	176.081	1.63825	0.000828067	0.0402492	NOT SIGIFICANT	NOT SIGIFICANT	NOT SIGIFICANT
Sb06g25180	2.18327	22.8444	3.38728	0.000353761	0.0287871	NOT SIGIFICANT	NOT SIGIFICANT	Dirigent protein 18 OS=Arabidopsis thaliana OX=3702 GN=DIR18 PE=2 SV=1
Sb06g25550	0.13358	0.981171	2.8768	0.000850351	0.0409658	NOT SIGIFICANT	K15382	Bidirectional sugar transporter SWEET17 OS=Arabidopsis thaliana OX=3702 GN=SWEET17 PE=1 SV=2
Sb06g27830	6.69722	25.3445	1.92004	0.000188837	0.022921	GO:0000003,GO:0000723,GO:0000726,GO:0003674,GO:0003824,GO:0005575,GO:0005622,GO:0005623,GO:0005634,GO:0005911,GO:0006139,GO:0006259,GO:0006278,GO:0006281,GO:0006282,GO:0006302,GO:0006303,GO:0006725,GO:0006793,GO:0006796,GO:0006807,GO:0006950,GO:0006974,GO:0006996,GO:0007004,GO:0007049,GO:0008150,GO:0008152,GO:0009058,GO:0009059,GO:0009314,GO:0009506,GO:0009628,GO:0009987,GO:0010035,GO:0010038,GO:…	K06640	Serine/threonine-protein kinase ATR OS=Arabidopsis thaliana OX=3702 GN=ATR PE=2 SV=2
Sb06g31120	144.497	32.4239	-2.15591	0.000101137	0.0175793	NOT SIGIFICANT	NOT SIGIFICANT	Zinc finger protein-like 1 homolog OS=Caenorhabditis elegans OX=6239 GN=Y45G12B.2 PE=3 SV=1
Sb06g31300	54.5737	25.2227	-1.11348	0.000861958	0.0406242	NOT SIGIFICANT	K01102	Probable protein phosphatase 2C 63 OS=Arabidopsis thaliana OX=3702 GN=PP2C63 PE=2 SV=1
Sb06g31630	208.451	84.5883	-1.30118	0.00130246	0.0482912	NOT SIGIFICANT	K09422	Transcription factor MYB73 OS=Arabidopsis thaliana OX=3702 GN=MYB73 PE=1 SV=1	调控生长素转到与侧根发育的转录因子
Sb06g31860	10.8448	5.25286	-1.04582	0.000939841	0.0421029	NOT SIGIFICANT	NOT SIGIFICANT	Protein IRX15-LIKE OS=Arabidopsis thaliana OX=3702 GN=IRX15-L PE=2 SV=1
Sb06g32100	0.305274	5.90612	4.27403	0.00126751	0.0478112	GO:0001101,GO:0003674,GO:0003824,GO:0005575,GO:0005576,GO:0005622,GO:0005623,GO:0005737,GO:0005739,GO:0008150,GO:0008152,GO:0009507,GO:0009532,GO:0009536,GO:0009570,GO:0010035,GO:0010167,GO:0016020,GO:0016491,GO:0016661,GO:0016662,GO:0042221,GO:0043226,GO:0043227,GO:0043229,GO:0043231,GO:0044422,GO:0044424,GO:0044434,GO:0044435,GO:0044444,GO:0044446,GO:0044464,GO:0048046,GO:0050421,GO:0050896,GO:…	K00366	Ferredoxin--nitrite reductase, chloroplastic OS=Betula pendula OX=3505 GN=NIR1 PE=2 SV=1
Sb06g32190	2.4205	12.0765	2.31883	0.000664493	0.0381943	GO:0000003,GO:0003006,GO:0003674,GO:0003676,GO:0003723,GO:0003824,GO:0004518,GO:0004519,GO:0005488,GO:0005575,GO:0005622,GO:0005623,GO:0005737,GO:0005739,GO:0006139,GO:0006725,GO:0006807,GO:0007275,GO:0008150,GO:0008152,GO:0009451,GO:0009507,GO:0009536,GO:0009790,GO:0009791,GO:0009793,GO:0009987,GO:0010154,GO:0016070,GO:0016787,GO:0016788,GO:0022414,GO:0032501,GO:0032502,GO:0034641,GO:0043170,GO:…	NOT SIGIFICANT	Pentatricopeptide repeat-containing protein At2g15690, mitochondrial OS=Arabidopsis thaliana OX=3702 GN=PCMP-H66 PE=1 SV=2
Sb06g32770	37.871	11.5991	-1.70708	0.00146584	0.0496081	NOT SIGIFICANT	NOT SIGIFICANT	Sodium channel modifier 1 OS=Homo sapiens OX=9606 GN=SCNM1 PE=1 SV=1
Sb06g32930	7.11974	1.64336	-2.11517	0.000393741	0.0299119	NOT SIGIFICANT	NOT SIGIFICANT	B3 domain-containing protein Os06g0194400 OS=Oryza sativa subsp. japonica OX=39947 GN=Os06g0194400 PE=2 SV=1
Sb06g33470	7.50619	0.203394	-5.20573	8.63653e-06	0.00815852	NOT SIGIFICANT	NOT SIGIFICANT	NOT SIGIFICANT
Sb07g00180	2.03865	10.5368	2.36975	3.42353e-05	0.0118068	GO:0003002,GO:0003674,GO:0003700,GO:0005575,GO:0005622,GO:0005623,GO:0005634,GO:0006355,GO:0007154,GO:0007165,GO:0007275,GO:0007389,GO:0008150,GO:0009653,GO:0009719,GO:0009725,GO:0009733,GO:0009734,GO:0009755,GO:0009791,GO:0009845,GO:0009889,GO:0009956,GO:0009987,GO:0010015,GO:0010033,GO:0010101,GO:0010102,GO:0010311,GO:0010468,GO:0010556,GO:0019219,GO:0019222,GO:0022622,GO:0023052,GO:0031323,GO:…	K09285	AP2-like ethylene-responsive transcription factor AIL5 OS=Arabidopsis thaliana OX=3702 GN=AIL5 PE=2 SV=2
Sb07g01220	4.51695	20.0885	2.15295	0.000700854	0.0380686	GO:0005575,GO:0005622,GO:0005623,GO:0005634,GO:0006139,GO:0006259,GO:0006304,GO:0006325,GO:0006464,GO:0006473,GO:0006475,GO:0006725,GO:0006807,GO:0006996,GO:0008150,GO:0008152,GO:0009987,GO:0016043,GO:0016569,GO:0016570,GO:0016573,GO:0018193,GO:0018205,GO:0018393,GO:0018394,GO:0019538,GO:0034641,GO:0035510,GO:0036211,GO:0043170,GO:0043226,GO:0043227,GO:0043229,GO:0043231,GO:0043412,GO:0043543,GO:…	NOT SIGIFICANT	Increased DNA methylation 2 OS=Arabidopsis thaliana OX=3702 GN=IDM2 PE=1 SV=1
Sb07g01340	0.319131	1.81058	2.50423	0.000696994	0.0382414	GO:0003674,GO:0003824,GO:0004348,GO:0004553,GO:0005575,GO:0005622,GO:0005623,GO:0005737,GO:0005783,GO:0005790,GO:0005886,GO:0006082,GO:0006629,GO:0006643,GO:0006664,GO:0006665,GO:0006687,GO:0006807,GO:0007275,GO:0007399,GO:0007417,GO:0008150,GO:0008152,GO:0008202,GO:0008206,GO:0008422,GO:0009056,GO:0009987,GO:0012505,GO:0015926,GO:0016020,GO:0016021,GO:0016137,GO:0016139,GO:0016787,GO:0016798,GO:…	K17108	Non-lysosomal glucosylceramidase OS=Rattus norvegicus OX=10116 GN=Gba2 PE=2 SV=2
Sb07g01990	15.0372	31.0437	1.04576	0.000219798	0.0244901	GO:0000724,GO:0000725,GO:0000733,GO:0003674,GO:0003676,GO:0003677,GO:0003678,GO:0003824,GO:0004003,GO:0004386,GO:0005488,GO:0005575,GO:0005622,GO:0005623,GO:0005634,GO:0005694,GO:0005737,GO:0006139,GO:0006259,GO:0006281,GO:0006302,GO:0006310,GO:0006725,GO:0006807,GO:0006950,GO:0006974,GO:0006996,GO:0008026,GO:0008094,GO:0008150,GO:0008152,GO:0009378,GO:0009987,GO:0016043,GO:0016462,GO:0016787,GO:…	K10901	ATP-dependent DNA helicase Q-like 3 OS=Arabidopsis thaliana OX=3702 GN=RECQL3 PE=1 SV=1
Sb07g02670	0.467774	0.0346124	-3.75645	2.88e-05	0.0115877	NOT SIGIFICANT	NOT SIGIFICANT	NOT SIGIFICANT
Sb07g04440	0.37464	49.4825	7.04527	0.00022045	0.0243133	GO:0003674,GO:0003824,GO:0004672,GO:0004674,GO:0005575,GO:0005622,GO:0005623,GO:0006464,GO:0006468,GO:0006793,GO:0006796,GO:0006807,GO:0007154,GO:0007165,GO:0008150,GO:0008152,GO:0009987,GO:0016301,GO:0016310,GO:0016740,GO:0016772,GO:0016773,GO:0018105,GO:0018107,GO:0018193,GO:0018209,GO:0018210,GO:0019538,GO:0023052,GO:0035556,GO:0036211,GO:0043170,GO:0043412,GO:0044237,GO:0044238,GO:0044260,GO:…	K07198	CBL-interacting serine/threonine-protein kinase 6 OS=Arabidopsis thaliana OX=3702 GN=CIPK6 PE=1 SV=1
Sb07g04460	90.3623	7.71428	-3.55012	0.000414197	0.0305059	GO:0003674,GO:0005488,GO:0005515,GO:0005575,GO:0005622,GO:0005623,GO:0005737,GO:0006082,GO:0006629,GO:0006631,GO:0006633,GO:0008150,GO:0008152,GO:0008610,GO:0009058,GO:0009314,GO:0009416,GO:0009507,GO:0009526,GO:0009536,GO:0009628,GO:0009642,GO:0009644,GO:0009892,GO:0009941,GO:0009987,GO:0010109,GO:0010205,GO:0016053,GO:0019222,GO:0019752,GO:0019904,GO:0031323,GO:0031324,GO:0031967,GO:0031975,GO:…	K10255	Omega-6 fatty acid desaturase, chloroplastic OS=Brassica napus OX=3708 PE=1 SV=1
Sb07g04610	16.3959	43.491	1.40738	0.000493439	0.0326858	GO:0000138,GO:0005575,GO:0005622,GO:0005623,GO:0005737,GO:0005794,GO:0005795,GO:0005797,GO:0005802,GO:0012505,GO:0031984,GO:0031985,GO:0043226,GO:0043227,GO:0043229,GO:0043231,GO:0044422,GO:0044424,GO:0044431,GO:0044444,GO:0044446,GO:0044464,GO:0098791	NOT SIGIFICANT	Protein YIP4a OS=Arabidopsis thaliana OX=3702 GN=YIP4A PE=1 SV=1
Sb07g05000	2.92365	7.07258	1.27446	0.00109605	0.0451875	NOT SIGIFICANT	K03255	Protein REDUCED CHLOROPLAST COVERAGE 2 OS=Arabidopsis thaliana OX=3702 GN=REC2 PE=1 SV=1
Sb07g05070	7.43545	19.6818	1.40437	2.24552e-05	0.0106062	NOT SIGIFICANT	NOT SIGIFICANT	NOT SIGIFICANT
Sb07g05180	1.10334	7.31329	2.72864	0.000495247	0.0327059	GO:0000003,GO:0003006,GO:0003674,GO:0003824,GO:0005575,GO:0005622,GO:0005623,GO:0005737,GO:0005783,GO:0005789,GO:0005886,GO:0006629,GO:0006723,GO:0007275,GO:0007276,GO:0008150,GO:0008152,GO:0009058,GO:0009555,GO:0009987,GO:0010025,GO:0010166,GO:0012505,GO:0016020,GO:0016491,GO:0019953,GO:0022412,GO:0022414,GO:0030154,GO:0031984,GO:0032501,GO:0032502,GO:0032504,GO:0042175,GO:0042335,GO:0043226,GO:…	NOT SIGIFICANT	Very-long-chain aldehyde decarbonylase CER3 OS=Arabidopsis thaliana OX=3702 GN=CER3 PE=1 SV=1	长链烃基合成相关
Sb07g05190	14.838	52.2237	1.81541	0.00108517	0.0452542	NOT SIGIFICANT	K17294	Tetraspanin-8 OS=Arabidopsis thaliana OX=3702 GN=TET8 PE=2 SV=1
Sb07g06420	1.20345	0.014646	-6.36053	1.87028e-05	0.0101589	NOT SIGIFICANT	NOT SIGIFICANT	Probable amino acid permease 7 OS=Arabidopsis thaliana OX=3702 GN=AAP7 PE=2 SV=1
Sb07g06440	0.680582	7.90231	3.53743	2.18465e-05	0.010548	NOT SIGIFICANT	NOT SIGIFICANT	Probable amino acid permease 7 OS=Arabidopsis thaliana OX=3702 GN=AAP7 PE=2 SV=1
Sb07g07310	5.77442	176.389	4.93294	2.4946e-05	0.01084	GO:0005575,GO:0005622,GO:0005623,GO:0005737,GO:0005768,GO:0005769,GO:0005794,GO:0005802,GO:0008150,GO:0012505,GO:0016020,GO:0016021,GO:0031224,GO:0031410,GO:0031982,GO:0031984,GO:0032386,GO:0032388,GO:0032879,GO:0032880,GO:0033157,GO:0043226,GO:0043227,GO:0043229,GO:0043231,GO:0044422,GO:0044424,GO:0044425,GO:0044431,GO:0044444,GO:0044446,GO:0044464,GO:0048518,GO:0050789,GO:0051049,GO:0051050,GO:…	K17086	Transmembrane 9 superfamily member 11 OS=Arabidopsis thaliana OX=3702 GN=TMN11 PE=2 SV=1
Sb07g07660	0.00952998	0.300065	4.97666	0.000220241	0.0244141	NOT SIGIFICANT	NOT SIGIFICANT	Aluminum-activated malate transporter 12 OS=Arabidopsis thaliana OX=3702 GN=ALMT12 PE=2 SV=1
Sb07g07720	12.9677	46.1011	1.82988	0.00139044	0.0488836	NOT SIGIFICANT	NOT SIGIFICANT	36.4 kDa proline-rich protein OS=Solanum lycopersicum OX=4081 GN=TPRP-F1 PE=2 SV=1
Sb07g08450	57.9697	226.794	1.96801	0.00022134	0.0242881	NOT SIGIFICANT	NOT SIGIFICANT	Organic cation/carnitine transporter 7 OS=Arabidopsis thaliana OX=3702 GN=OCT7 PE=2 SV=1
Sb07g09050	3.3787	14.6673	2.11806	4.22565e-05	0.0117706	NOT SIGIFICANT	NOT SIGIFICANT	Protein DEEPER ROOTING 1 OS=Prunus persica OX=3760 GN=DRO1 PE=2 SV=1	根系发育相关，与根的下扎存在关联，受生长素的负调控
Sb07g09140	3.1924	1.01173	-1.65782	0.000737818	0.0389091	NOT SIGIFICANT	K16609	Tubulin--tyrosine ligase-like protein 12 OS=Mus musculus OX=10090 GN=Ttll12 PE=1 SV=1
Sb07g09790	0.126526	0.854805	2.75617	0.00116449	0.0461695	NOT SIGIFICANT	K18886	Loganic acid O-methyltransferase OS=Catharanthus roseus OX=4058 GN=LAMT PE=1 SV=1
Sb07g10110	1.22597	4.10527	1.74355	0.00115394	0.0460031	GO:0000165,GO:0000302,GO:0003674,GO:0003824,GO:0004672,GO:0004674,GO:0004707,GO:0005575,GO:0005622,GO:0005623,GO:0005634,GO:0005737,GO:0006464,GO:0006468,GO:0006793,GO:0006796,GO:0006807,GO:0006950,GO:0006979,GO:0007154,GO:0007165,GO:0008150,GO:0008152,GO:0009636,GO:0009987,GO:0010035,GO:0010468,GO:0016301,GO:0016310,GO:0016740,GO:0016772,GO:0016773,GO:0019222,GO:0019538,GO:0023014,GO:0023052,GO:…	K20537	Mitogen-activated protein kinase 7 OS=Arabidopsis thaliana OX=3702 GN=MPK7 PE=1 SV=2	被ABA激活的MPK7
Sb07g10520	0.010125	8.72862	9.75169	0.000154344	0.022062	GO:0003674,GO:0003824,GO:0005575,GO:0005622,GO:0005623,GO:0005634,GO:0005737,GO:0005829,GO:0006325,GO:0006355,GO:0006464,GO:0006479,GO:0006807,GO:0006996,GO:0008150,GO:0008152,GO:0008168,GO:0008170,GO:0008213,GO:0008276,GO:0008469,GO:0008757,GO:0009889,GO:0009987,GO:0010468,GO:0010556,GO:0016043,GO:0016273,GO:0016274,GO:0016569,GO:0016570,GO:0016571,GO:0016740,GO:0016741,GO:0018193,GO:0018195,GO:…	K11434	Protein arginine N-methyltransferase 1.1 OS=Arabidopsis thaliana OX=3702 GN=PRMT11 PE=1 SV=1
Sb07g11280	0.0100631	5.41472	9.07167	9.65915e-05	0.0173442	NOT SIGIFICANT	NOT SIGIFICANT	NOT SIGIFICANT
Sb07g11820	1.98259	5.97922	1.59257	0.000613996	0.0364489	NOT SIGIFICANT	NOT SIGIFICANT	IMPACT family member in pol 5'region (Fragment) OS=Thermus thermophilus OX=274 PE=3 SV=1
Sb07g14680	4.05212	1.08417	-1.90209	0.000877405	0.0409965	NOT SIGIFICANT	K21374	UDP-glycosyltransferase 87A2 OS=Arabidopsis thaliana OX=3702 GN=UGT87A2 PE=1 SV=1	被干旱等胁迫激活的UGT
Sb07g14950	4.66034	9.92351	1.09042	6.99335e-05	0.0144709	NOT SIGIFICANT	NOT SIGIFICANT	NOT SIGIFICANT
Sb07g15060	2.02229	4.93178	1.28612	0.000283321	0.0266481	NOT SIGIFICANT	K06928	Cancer-related nucleoside-triphosphatase OS=Homo sapiens OX=9606 GN=NTPCR PE=1 SV=1
Sb07g15350	0.010804	125.32	13.5018	0.000395627	0.0298465	NOT SIGIFICANT	NOT SIGIFICANT	NOT SIGIFICANT
Sb07g15360	0.00943827	3.72856	8.62588	0.000147398	0.0214934	GO:0005575,GO:0005622,GO:0005623,GO:0005737,GO:0005783,GO:0005789,GO:0008150,GO:0008152,GO:0009058,GO:0009719,GO:0009725,GO:0009733,GO:0010033,GO:0012505,GO:0016020,GO:0019748,GO:0031090,GO:0031984,GO:0042175,GO:0042221,GO:0043226,GO:0043227,GO:0043229,GO:0043231,GO:0044422,GO:0044424,GO:0044425,GO:0044432,GO:0044444,GO:0044446,GO:0044464,GO:0044550,GO:0050896,GO:0098827	K20562	Cytochrome P450 71AU50 OS=Prunus mume OX=102107 GN=CYP71AU50 PE=2 SV=1
Sb07g15990	3.24506	0.119336	-4.76515	1.97768e-05	0.0097657	GO:0001101,GO:0002831,GO:0003674,GO:0005488,GO:0005543,GO:0005575,GO:0005622,GO:0005623,GO:0005737,GO:0005768,GO:0005783,GO:0005789,GO:0005886,GO:0008150,GO:0008289,GO:0009719,GO:0009723,GO:0009725,GO:0009751,GO:0010008,GO:0010033,GO:0012505,GO:0014070,GO:0016020,GO:0031090,GO:0031347,GO:0031410,GO:0031982,GO:0031984,GO:0032101,GO:0035091,GO:0042175,GO:0042221,GO:0042493,GO:0043167,GO:0043168,GO:…	NOT SIGIFICANT	Protein ENHANCED DISEASE RESISTANCE 2 OS=Arabidopsis thaliana OX=3702 GN=EDR2 PE=2 SV=1	负调控抗病的一个基因
Sb07g16220	0.0808412	11.1521	7.10801	0.000585533	0.0355359	NOT SIGIFICANT	NOT SIGIFICANT	NOT SIGIFICANT
Sb07g16340	10.6599	2.24808	-2.24543	0.000238006	0.0245079	NOT SIGIFICANT	NOT SIGIFICANT	Putative late blight resistance protein homolog R1A-6 OS=Solanum demissum OX=50514 GN=R1A-6 PE=3 SV=2	抗晚疫病蛋白
Sb08g00600	19.7046	51.3402	1.38156	0.000987488	0.0433437	GO:0003674,GO:0003676,GO:0003723,GO:0003824,GO:0004518,GO:0004519,GO:0005488,GO:0005575,GO:0005622,GO:0005623,GO:0005737,GO:0005739,GO:0006139,GO:0006725,GO:0006807,GO:0008150,GO:0008152,GO:0009451,GO:0009987,GO:0016070,GO:0016553,GO:0016554,GO:0016787,GO:0016788,GO:0034641,GO:0043170,GO:0043226,GO:0043227,GO:0043229,GO:0043231,GO:0043412,GO:0044237,GO:0044238,GO:0044424,GO:0044444,GO:0044464,GO:…	K16833	Putative pentatricopeptide repeat-containing protein At3g11460, mitochondrial OS=Arabidopsis thaliana OX=3702 GN=PCMP-H52 PE=1 SV=1
Sb08g00710	7.84002	0.010202	-9.58586	8.46414e-06	0.00835911	GO:0003674,GO:0003824,GO:0004842,GO:0005488,GO:0005515,GO:0005575,GO:0005622,GO:0005623,GO:0005737,GO:0005783,GO:0006464,GO:0006508,GO:0006511,GO:0006807,GO:0008150,GO:0008152,GO:0009056,GO:0009057,GO:0009987,GO:0012505,GO:0016020,GO:0016567,GO:0016740,GO:0019538,GO:0019787,GO:0019899,GO:0019941,GO:0030163,GO:0031625,GO:0032446,GO:0036211,GO:0043170,GO:0043226,GO:0043227,GO:0043229,GO:0043231,GO:…	K10578	Ubiquitin-conjugating enzyme E2 32 OS=Arabidopsis thaliana OX=3702 GN=UBC32 PE=2 SV=1	调控抗旱的E2
Sb08g02550	213.678	45.3908	-2.23497	0.000650882	0.0377112	GO:0000993,GO:0001098,GO:0001099,GO:0003674,GO:0003676,GO:0003723,GO:0003729,GO:0005488,GO:0005515,GO:0005575,GO:0005622,GO:0005623,GO:0005634,GO:0005654,GO:0005737,GO:0005849,GO:0006139,GO:0006351,GO:0006353,GO:0006366,GO:0006369,GO:0006378,GO:0006379,GO:0006396,GO:0006397,GO:0006725,GO:0006807,GO:0008150,GO:0008152,GO:0009058,GO:0009059,GO:0009909,GO:0009911,GO:0009987,GO:0010467,GO:0016070,GO:…	K14400	Polyadenylation and cleavage factor homolog 4 OS=Arabidopsis thaliana OX=3702 GN=PCFS4 PE=1 SV=1
Sb08g03560	1.57914	6.6927	2.08345	0.000133988	0.0205011	NOT SIGIFICANT	NOT SIGIFICANT	NOT SIGIFICANT
Sb08g05790	7.22139	17.1226	1.24555	0.000113802	0.0185907	GO:0003674,GO:0003824,GO:0004439,GO:0004445,GO:0005975,GO:0006066,GO:0006629,GO:0006644,GO:0006650,GO:0006793,GO:0006796,GO:0007275,GO:0008150,GO:0008152,GO:0009056,GO:0009791,GO:0009845,GO:0009987,GO:0016311,GO:0016787,GO:0016788,GO:0016791,GO:0019637,GO:0019751,GO:0030258,GO:0032501,GO:0032502,GO:0032957,GO:0034485,GO:0034593,GO:0034594,GO:0034595,GO:0042578,GO:0043647,GO:0044237,GO:0044238,GO:…	K02945	Type IV inositol polyphosphate 5-phosphatase 3 OS=Arabidopsis thaliana OX=3702 GN=IP5P3 PE=1 SV=1
Sb08g06130	4.19729	28.3032	2.75344	1.58631e-05	0.010137	NOT SIGIFICANT	NOT SIGIFICANT	Chaperone protein DnaJ OS=Finegoldia magna (strain ATCC 29328 / DSM 20472 / WAL 2508) OX=334413 GN=dnaJ PE=3 SV=1
Sb08g06160	24.7503	0.0107925	-11.1632	5.57597e-05	0.0130268	NOT SIGIFICANT	K19476	IST1-like protein OS=Dictyostelium discoideum OX=44689 GN=DDB_G0289029 PE=3 SV=1
Sb08g06200	11.2681	3.48161	-1.69442	0.000825863	0.0402321	NOT SIGIFICANT	NOT SIGIFICANT	NOT SIGIFICANT
Sb08g07560	3.38822	14.3708	2.08455	0.00105182	0.0445476	GO:0003674,GO:0003824,GO:0005575,GO:0005622,GO:0005623,GO:0005737,GO:0005739,GO:0005829,GO:0006082,GO:0006091,GO:0006520,GO:0006551,GO:0006552,GO:0006725,GO:0006778,GO:0006787,GO:0006807,GO:0008150,GO:0008152,GO:0009055,GO:0009056,GO:0009063,GO:0009081,GO:0009083,GO:0009987,GO:0015994,GO:0015996,GO:0016054,GO:0016491,GO:0019439,GO:0019752,GO:0022900,GO:0033013,GO:0033015,GO:0034641,GO:0042440,GO:…	K03521	Electron transfer flavoprotein subunit beta, mitochondrial OS=Arabidopsis thaliana OX=3702 GN=ETFB PE=1 SV=1
Sb08g08110	8.57074	3.86155	-1.15024	0.000331359	0.0281228	NOT SIGIFICANT	NOT SIGIFICANT	Pentatricopeptide repeat-containing protein At4g33170 OS=Arabidopsis thaliana OX=3702 GN=PCMP-H53 PE=3 SV=1
Sb08g09630	225.101	7.81972	-4.84731	0.000373136	0.0295881	GO:0000428,GO:0001817,GO:0001819,GO:0002682,GO:0002684,GO:0003674,GO:0003676,GO:0003677,GO:0003690,GO:0005488,GO:0005575,GO:0005622,GO:0005623,GO:0005634,GO:0005654,GO:0005666,GO:0008150,GO:0030880,GO:0031347,GO:0031349,GO:0031974,GO:0031981,GO:0032479,GO:0032481,GO:0032648,GO:0032728,GO:0032991,GO:0043226,GO:0043227,GO:0043229,GO:0043231,GO:0043233,GO:0044422,GO:0044424,GO:0044428,GO:0044446,GO:…	K03025	DNA-directed RNA polymerase III subunit rpc6 OS=Dictyostelium discoideum OX=44689 GN=polr3f PE=3 SV=1
Sb08g09690	31.4367	5.42959	-2.53353	0.00087542	0.0409919	NOT SIGIFICANT	K03665	GTPase HflX OS=Lacrimispora saccharolytica (strain ATCC 35040 / DSM 2544 / NRCC 2533 / WM1) OX=610130 GN=hflX PE=3 SV=1
Sb08g10360	11.8131	0.00990924	-10.2193	0.000889684	0.0408672	GO:0000226,GO:0000902,GO:0001558,GO:0003674,GO:0005488,GO:0005515,GO:0005575,GO:0005622,GO:0005623,GO:0005737,GO:0005856,GO:0005874,GO:0005881,GO:0005938,GO:0006996,GO:0007010,GO:0007017,GO:0008017,GO:0008092,GO:0008150,GO:0009653,GO:0009826,GO:0009987,GO:0015630,GO:0015631,GO:0016043,GO:0016049,GO:0022603,GO:0022604,GO:0030308,GO:0030863,GO:0030865,GO:0030981,GO:0031122,GO:0032502,GO:0032989,GO:…	NOT SIGIFICANT	Protein WVD2-like 3 OS=Arabidopsis thaliana OX=3702 GN=WDL3 PE=1 SV=1
Sb08g10440	4.67374	0.837063	-2.48117	0.000167934	0.0225228	NOT SIGIFICANT	NOT SIGIFICANT	NOT SIGIFICANT
Sb08g10640	1.46126	0.0109713	-7.05734	0.000178357	0.0227951	NOT SIGIFICANT	NOT SIGIFICANT	UDP-glycosyltransferase 86A1 OS=Arabidopsis thaliana OX=3702 GN=UGT86A1 PE=2 SV=1
Sb08g11080	13.0571	5.25198	-1.3139	0.00149282	0.0499761	GO:0000981,GO:0000988,GO:0000989,GO:0001067,GO:0001076,GO:0001101,GO:0001134,GO:0001135,GO:0003674,GO:0003676,GO:0003677,GO:0003700,GO:0005488,GO:0005575,GO:0005622,GO:0005623,GO:0005634,GO:0006355,GO:0006357,GO:0006950,GO:0006952,GO:0006970,GO:0008150,GO:0009414,GO:0009415,GO:0009605,GO:0009607,GO:0009617,GO:0009620,GO:0009628,GO:0009651,GO:0009719,GO:0009723,GO:0009725,GO:0009733,GO:0009737,GO:…	K09422	Transcription factor MYB73 OS=Arabidopsis thaliana OX=3702 GN=MYB73 PE=1 SV=1	生长素响应转录因子
Sb08g11670	0.0112517	7.98538	9.47107	0.000458479	0.0318255	GO:0000325,GO:0003674,GO:0005215,GO:0005575,GO:0005622,GO:0005623,GO:0005737,GO:0005773,GO:0005774,GO:0006810,GO:0006996,GO:0007033,GO:0008150,GO:0009705,GO:0009966,GO:0009968,GO:0009987,GO:0010646,GO:0010648,GO:0016020,GO:0016021,GO:0016043,GO:0016192,GO:0023051,GO:0023057,GO:0031090,GO:0031224,GO:0043226,GO:0043227,GO:0043229,GO:0043231,GO:0044422,GO:0044424,GO:0044425,GO:0044437,GO:0044444,GO:…	NOT SIGIFICANT	Protein LAZ1 homolog 1 OS=Arabidopsis thaliana OX=3702 GN=At1g77220 PE=2 SV=1	油菜素内脂相关基因
Sb08g11830	11.9233	36.5163	1.61476	0.00137614	0.0489352	NOT SIGIFICANT	NOT SIGIFICANT	NOT SIGIFICANT
Sb08g12400	1.0888	3.86122	1.82632	0.00088574	0.0409457	GO:0003674,GO:0003824,GO:0003839,GO:0005575,GO:0005622,GO:0005623,GO:0005737,GO:0005829,GO:0006518,GO:0006575,GO:0006749,GO:0006751,GO:0006790,GO:0006807,GO:0008150,GO:0008152,GO:0009056,GO:0009987,GO:0016829,GO:0016840,GO:0016842,GO:0034641,GO:0042219,GO:0043171,GO:0043603,GO:0044237,GO:0044248,GO:0044273,GO:0044424,GO:0044444,GO:0044464,GO:0051186,GO:0051187,GO:0071704,GO:1901564,GO:1901565,GO:…	K07232	Gamma-glutamylcyclotransferase 2-3 OS=Arabidopsis thaliana OX=3702 GN=GGCT2;3 PE=1 SV=1
Sb08g13220	0.989436	0.268501	-1.88168	0.000371867	0.0295955	GO:0003674,GO:0003824,GO:0005575,GO:0005622,GO:0005623,GO:0005737,GO:0005783,GO:0006139,GO:0006396,GO:0006399,GO:0006400,GO:0006725,GO:0006807,GO:0008033,GO:0008150,GO:0008152,GO:0009451,GO:0009987,GO:0010467,GO:0012505,GO:0016070,GO:0016740,GO:0016782,GO:0034470,GO:0034641,GO:0034660,GO:0035596,GO:0035598,GO:0035600,GO:0043170,GO:0043226,GO:0043227,GO:0043229,GO:0043231,GO:0043412,GO:0044237,GO:…	K15865	Threonylcarbamoyladenosine tRNA methylthiotransferase OS=Homo sapiens OX=9606 GN=CDKAL1 PE=1 SV=1
Sb08g14020	0.401572	2.96164	2.88267	4.49644e-05	0.012061	NOT SIGIFICANT	NOT SIGIFICANT	Probable methyltransferase At1g29790 OS=Arabidopsis thaliana OX=3702 GN=CLSC5 PE=2 SV=1
Sb08g14600	28.7579	10.71	-1.425	0.000882009	0.0410352	GO:0003674,GO:0003824,GO:0004497,GO:0005575,GO:0008150,GO:0008152,GO:0009058,GO:0016020,GO:0016491,GO:0016705,GO:0016709,GO:0019748,GO:0044550,GO:0055114	K07408	Labd-13Z-ene-9,15,16-triol synthase, chloroplastic OS=Vitex agnus-castus OX=54477 GN=CYP76BK1 PE=1 SV=1
Sb08g15440	5.58263	0.00903603	-9.27104	0.000101228	0.0174554	NOT SIGIFICANT	NOT SIGIFICANT	Guanine nucleotide-binding protein subunit gamma 3 OS=Arabidopsis thaliana OX=3702 GN=GG3 PE=2 SV=1
Sb08g15940	0.0565715	7.19446	6.99067	2.44897e-05	0.0110852	GO:0003674,GO:0003824,GO:0004672,GO:0004674,GO:0004675,GO:0004888,GO:0005575,GO:0005623,GO:0005886,GO:0006464,GO:0006468,GO:0006793,GO:0006796,GO:0006807,GO:0007154,GO:0007165,GO:0007166,GO:0007167,GO:0007178,GO:0008150,GO:0008152,GO:0009987,GO:0016020,GO:0016301,GO:0016310,GO:0016740,GO:0016772,GO:0016773,GO:0019199,GO:0019538,GO:0023052,GO:0036211,GO:0038023,GO:0043170,GO:0043412,GO:0044237,GO:…	K04733	Probable serine/threonine-protein kinase PBL17 OS=Arabidopsis thaliana OX=3702 GN=PBL17 PE=1 SV=1
Sb08g16140	50.7689	17.9849	-1.49716	0.000524203	0.0336964	NOT SIGIFICANT	NOT SIGIFICANT	NOT SIGIFICANT
Sb08g16310	118.215	35.7465	-1.72554	0.00128348	0.0480794	NOT SIGIFICANT	NOT SIGIFICANT	NOT SIGIFICANT
Sb08g16710	0.95803	0.145982	-2.71428	0.000195182	0.0234294	NOT SIGIFICANT	NOT SIGIFICANT	NOT SIGIFICANT
Sb08g16870	4.85446	39.3852	3.02027	0.000511011	0.033442	GO:0001101,GO:0003674,GO:0003824,GO:0004672,GO:0004674,GO:0004683,GO:0005488,GO:0005515,GO:0005516,GO:0005575,GO:0005622,GO:0005623,GO:0005634,GO:0005737,GO:0005886,GO:0006464,GO:0006468,GO:0006793,GO:0006796,GO:0006807,GO:0006950,GO:0006970,GO:0007154,GO:0007165,GO:0007275,GO:0008150,GO:0008152,GO:0009555,GO:0009628,GO:0009719,GO:0009725,GO:0009737,GO:0009738,GO:0009755,GO:0009931,GO:0009987,GO:…	K13412	Calcium-dependent protein kinase 30 OS=Arabidopsis thaliana OX=3702 GN=CPK30 PE=1 SV=1
Sb08g16980	10.5689	0.270982	-5.28549	0.000703468	0.0381153	GO:0000003,GO:0003006,GO:0005575,GO:0005622,GO:0005623,GO:0005634,GO:0007049,GO:0007275,GO:0008150,GO:0009555,GO:0009556,GO:0009786,GO:0009987,GO:0019953,GO:0022402,GO:0022414,GO:0032501,GO:0032502,GO:0034293,GO:0043226,GO:0043227,GO:0043229,GO:0043231,GO:0043934,GO:0044424,GO:0044464,GO:0044703,GO:0048229,GO:0048236,GO:0048856,GO:0048869,GO:0050789,GO:0050794,GO:0051302,GO:0051321,GO:0051704,GO:…	NOT SIGIFICANT	LOB domain-containing protein 27 OS=Arabidopsis thaliana OX=3702 GN=LBD27 PE=1 SV=1
Sb08g17470	1.31273	3.4396	1.38968	0.000295501	0.0272049	NOT SIGIFICANT	NOT SIGIFICANT	NOT SIGIFICANT
Sb09g00090	1.45156	18.4129	3.66504	0.000624481	0.0366706	GO:0003674,GO:0003824,GO:0005575,GO:0005622,GO:0005623,GO:0006066,GO:0006950,GO:0008150,GO:0008152,GO:0009266,GO:0009409,GO:0009628,GO:0016491,GO:0016614,GO:0016899,GO:0043226,GO:0043227,GO:0043229,GO:0043231,GO:0044281,GO:0044424,GO:0044464,GO:0046577,GO:0050896,GO:0055114,GO:0071704,GO:1901615	K17756	Long-chain-alcohol oxidase FAO3 OS=Arabidopsis thaliana OX=3702 GN=FAO3 PE=1 SV=1	与蜡质合成相关
Sb09g00120	2.35858	0.732606	-1.68681	0.000694056	0.0381766	GO:0005575,GO:0005622,GO:0005623,GO:0005737,GO:0005783,GO:0006914,GO:0008150,GO:0008152,GO:0009056,GO:0009987,GO:0012505,GO:0016236,GO:0043226,GO:0043227,GO:0043229,GO:0043231,GO:0044237,GO:0044248,GO:0044424,GO:0044444,GO:0044464,GO:0061919	K10134	Protein EI24 homolog OS=Arabidopsis thaliana OX=3702 GN=At4g06676 PE=2 SV=1
Sb09g00320	13.1901	3.5281	-1.9025	0.000214953	0.0245805	NOT SIGIFICANT	NOT SIGIFICANT	NOT SIGIFICANT
Sb09g02720	5.51505	0.807529	-2.77179	0.00115258	0.046118	NOT SIGIFICANT	K10949	ER lumen protein-retaining receptor OS=Petunia hybrida OX=4102 GN=ERD2 PE=2 SV=1
Sb09g02960	5.55287	2.01212	-1.46451	0.00102765	0.043866	NOT SIGIFICANT	NOT SIGIFICANT	NOT SIGIFICANT
Sb09g02970	2.26954	0.0103619	-7.77497	0.00055333	0.0345466	GO:0000003,GO:0000988,GO:0000989,GO:0003006,GO:0003674,GO:0003676,GO:0003677,GO:0003700,GO:0003712,GO:0005488,GO:0005575,GO:0005622,GO:0005623,GO:0005634,GO:0006355,GO:0007275,GO:0008150,GO:0009314,GO:0009416,GO:0009628,GO:0009648,GO:0009791,GO:0009889,GO:0010099,GO:0010100,GO:0010228,GO:0010468,GO:0010556,GO:0019219,GO:0019222,GO:0022414,GO:0031323,GO:0031326,GO:0032501,GO:0032502,GO:0043226,GO:…	NOT SIGIFICANT	B-box zinc finger protein 25 OS=Arabidopsis thaliana OX=3702 GN=BBX25 PE=1 SV=2
Sb09g03010	53.9556	7.15722	-2.9143	0.000245999	0.0248596	GO:0003674,GO:0005215,GO:0005351,GO:0005355,GO:0005402,GO:0005575,GO:0005622,GO:0005623,GO:0005737,GO:0006810,GO:0006811,GO:0006812,GO:0008150,GO:0008324,GO:0008643,GO:0008645,GO:0009507,GO:0009526,GO:0009536,GO:0009941,GO:0015075,GO:0015077,GO:0015078,GO:0015144,GO:0015145,GO:0015149,GO:0015291,GO:0015293,GO:0015294,GO:0015295,GO:0015318,GO:0015672,GO:0015749,GO:0022804,GO:0022857,GO:0022890,GO:…	NOT SIGIFICANT	Plastidic glucose transporter 4 OS=Arabidopsis thaliana OX=3702 GN=At5g16150 PE=1 SV=2
Sb09g05000	7.69193	1.42536	-2.43202	0.000776883	0.03953	GO:0003674,GO:0003824,GO:0004656,GO:0005575,GO:0005622,GO:0005623,GO:0005737,GO:0005794,GO:0006082,GO:0006464,GO:0006520,GO:0006575,GO:0006807,GO:0008150,GO:0008152,GO:0009987,GO:0012505,GO:0016491,GO:0016705,GO:0016706,GO:0018126,GO:0018193,GO:0018208,GO:0018401,GO:0019471,GO:0019511,GO:0019538,GO:0019752,GO:0019798,GO:0031543,GO:0031545,GO:0036211,GO:0043170,GO:0043226,GO:0043227,GO:0043229,GO:…	K00472	Prolyl 4-hydroxylase 1 OS=Arabidopsis thaliana OX=3702 GN=P4H1 PE=1 SV=1
Sb09g05500	5.219	1.24342	-2.06946	0.000853024	0.0410036	GO:0005575,GO:0005622,GO:0005623,GO:0005737,GO:0005783,GO:0005789,GO:0005886,GO:0005911,GO:0008150,GO:0009506,GO:0009628,GO:0012505,GO:0016020,GO:0030054,GO:0031984,GO:0042175,GO:0043226,GO:0043227,GO:0043229,GO:0043231,GO:0044422,GO:0044424,GO:0044425,GO:0044432,GO:0044444,GO:0044446,GO:0044464,GO:0050896,GO:0055044,GO:0071944,GO:0080167,GO:0098827	K20720	Reticulon-like protein B1 OS=Arabidopsis thaliana OX=3702 GN=RTNLB1 PE=1 SV=1
Sb09g05520	0.675748	0.0342103	-4.30398	5.32332e-05	0.0131432	NOT SIGIFICANT	NOT SIGIFICANT	Uncharacterized protein ycf68 OS=Eucalyptus globulus subsp. globulus OX=71271 GN=ycf68-1 PE=3 SV=1
Sb09g06540	0.0447507	4.77386	6.7371	4.15779e-05	0.0118864	GO:0003674,GO:0004857,GO:0005575,GO:0005618,GO:0005622,GO:0005623,GO:0005737,GO:0005794,GO:0005911,GO:0008150,GO:0009505,GO:0009506,GO:0012505,GO:0016020,GO:0030054,GO:0030234,GO:0030312,GO:0043086,GO:0043226,GO:0043227,GO:0043229,GO:0043231,GO:0044092,GO:0044424,GO:0044444,GO:0044464,GO:0050790,GO:0055044,GO:0065007,GO:0065009,GO:0071944,GO:0090353,GO:0098772	NOT SIGIFICANT	Polygalacturonase inhibitor OS=Vitis vinifera OX=29760 GN=pgip PE=1 SV=1
Sb09g06620	28.0275	3.91529	-2.83965	9.33551e-05	0.0174856	NOT SIGIFICANT	NOT SIGIFICANT	NOT SIGIFICANT
Sb09g06780	0.0108515	20.9267	10.9132	0.000677856	0.038254	GO:0001101,GO:0003674,GO:0003700,GO:0005488,GO:0005515,GO:0005575,GO:0005622,GO:0005623,GO:0005634,GO:0006355,GO:0006950,GO:0007154,GO:0007165,GO:0007275,GO:0008150,GO:0009414,GO:0009415,GO:0009605,GO:0009606,GO:0009611,GO:0009628,GO:0009629,GO:0009630,GO:0009653,GO:0009719,GO:0009725,GO:0009733,GO:0009734,GO:0009753,GO:0009755,GO:0009791,GO:0009889,GO:0009890,GO:0009892,GO:0009987,GO:0010015,GO:…	K14484	Auxin-responsive protein IAA14 OS=Arabidopsis thaliana OX=3702 GN=IAA14 PE=1 SV=2
Sb09g06790	0.0108408	20.9267	10.9147	0.000677856	0.038254	NOT SIGIFICANT	NOT SIGIFICANT	NOT SIGIFICANT
Sb09g07150	18.1775	6.23917	-1.54273	0.00121618	0.0466029	NOT SIGIFICANT	NOT SIGIFICANT	Protein VTE6, chloroplastic OS=Arabidopsis thaliana OX=3702 GN=VTE6 PE=1 SV=1
Sb09g07250	119.584	37.4427	-1.67527	5.11715e-05	0.0129279	NOT SIGIFICANT	NOT SIGIFICANT	NOT SIGIFICANT
Sb09g07810	4.93505	24.3021	2.29995	0.000217667	0.0245038	GO:0002181,GO:0003674,GO:0003676,GO:0003723,GO:0003729,GO:0003735,GO:0005198,GO:0005488,GO:0005575,GO:0005618,GO:0005622,GO:0005623,GO:0005634,GO:0005730,GO:0005737,GO:0005829,GO:0005840,GO:0005844,GO:0005886,GO:0005911,GO:0006412,GO:0006518,GO:0006807,GO:0008150,GO:0008152,GO:0009058,GO:0009059,GO:0009506,GO:0009507,GO:0009536,GO:0009987,GO:0010467,GO:0015935,GO:0016020,GO:0019538,GO:0022626,GO:…	K01807	40S ribosomal protein S3a OS=Catharanthus roseus OX=4058 GN=RPS3A PE=2 SV=4
Sb09g08530	2.25916	12.1622	2.42854	4.01268e-05	0.0119429	GO:0000302,GO:0001101,GO:0001676,GO:0003674,GO:0003824,GO:0004467,GO:0005575,GO:0005622,GO:0005623,GO:0005737,GO:0005777,GO:0006082,GO:0006629,GO:0006631,GO:0006950,GO:0006970,GO:0006979,GO:0008150,GO:0008152,GO:0009628,GO:0009651,GO:0009987,GO:0010035,GO:0010193,GO:0015645,GO:0016020,GO:0016405,GO:0016874,GO:0016877,GO:0016878,GO:0019752,GO:0032787,GO:0042221,GO:0042493,GO:0042579,GO:0043226,GO:…	K01897	Long chain acyl-CoA synthetase 7, peroxisomal OS=Arabidopsis thaliana OX=3702 GN=LACS7 PE=1 SV=2	长链烃基合成相关
Sb09g08580	0.0098503	10.4885	10.0563	0.000351587	0.0288262	GO:0005575,GO:0005622,GO:0005623,GO:0005737,GO:0006082,GO:0006790,GO:0006807,GO:0006950,GO:0006970,GO:0008150,GO:0008152,GO:0009058,GO:0009507,GO:0009526,GO:0009532,GO:0009536,GO:0009570,GO:0009579,GO:0009628,GO:0009651,GO:0009941,GO:0009987,GO:0016143,GO:0016144,GO:0019748,GO:0019757,GO:0019758,GO:0019760,GO:0019761,GO:0031967,GO:0031975,GO:0043226,GO:0043227,GO:0043229,GO:0043231,GO:0043436,GO:…	K00052	3-isopropylmalate dehydrogenase, chloroplastic OS=Brassica napus OX=3708 PE=2 SV=1
Sb09g08710	102.284	35.5449	-1.52487	0.000343422	0.0285882	NOT SIGIFICANT	NOT SIGIFICANT	NOT SIGIFICANT
Sb09g09880	479.862	33.0113	-3.86159	0.000345027	0.0286122	NOT SIGIFICANT	NOT SIGIFICANT	Importin subunit alpha-1a OS=Oryza sativa subsp. japonica OX=39947 GN=Os01g0253300 PE=1 SV=2
Sb09g10770	10.0703	31.8247	1.66004	0.000105992	0.0181329	GO:0003674,GO:0003824,GO:0004553,GO:0004650,GO:0005575,GO:0005618,GO:0005623,GO:0008150,GO:0009664,GO:0009825,GO:0009827,GO:0009831,GO:0009987,GO:0016043,GO:0016049,GO:0016787,GO:0016798,GO:0030312,GO:0040007,GO:0042545,GO:0042547,GO:0044464,GO:0045229,GO:0071554,GO:0071555,GO:0071669,GO:0071840,GO:0071944	K01213	Polygalacturonase At1g48100 OS=Arabidopsis thaliana OX=3702 GN=At1g48100 PE=2 SV=1
Sb09g10880	24.4408	59.7029	1.28851	0.00127682	0.0479955	GO:0000166,GO:0003674,GO:0003824,GO:0004672,GO:0004740,GO:0005488,GO:0005515,GO:0005524,GO:0005575,GO:0005622,GO:0005623,GO:0005737,GO:0005739,GO:0005759,GO:0006082,GO:0006090,GO:0006464,GO:0006468,GO:0006793,GO:0006796,GO:0006807,GO:0007154,GO:0007165,GO:0008144,GO:0008150,GO:0008152,GO:0009927,GO:0009987,GO:0016301,GO:0016310,GO:0016740,GO:0016772,GO:0016773,GO:0017076,GO:0019538,GO:0019752,GO:…	K00898	[Pyruvate dehydrogenase (acetyl-transferring)] kinase, mitochondrial OS=Arabidopsis thaliana OX=3702 GN=PDK PE=1 SV=1
Sb09g11890	0.204606	1.1462	2.48594	0.000110221	0.0185642	NOT SIGIFICANT	K01681	Aconitate hydratase 3, mitochondrial OS=Arabidopsis thaliana OX=3702 GN=ACO3 PE=1 SV=2
Sb09g12820	13.2149	29.4121	1.15424	0.00145417	0.0496773	NOT SIGIFICANT	NOT SIGIFICANT	Protein ENHANCED DOWNY MILDEW 2 OS=Arabidopsis thaliana OX=3702 GN=EDM2 PE=1 SV=1	抗NRL协调基因
Sb09g13700	3.84628	14.0432	1.86833	0.000482037	0.0327288	GO:0005575,GO:0005622,GO:0005623,GO:0005737,GO:0006139,GO:0006725,GO:0006807,GO:0006996,GO:0008150,GO:0008152,GO:0009451,GO:0009507,GO:0009532,GO:0009536,GO:0009570,GO:0009657,GO:0009658,GO:0009987,GO:0016043,GO:0016070,GO:0016071,GO:0016556,GO:0034641,GO:0043170,GO:0043226,GO:0043227,GO:0043229,GO:0043231,GO:0043412,GO:0044237,GO:0044238,GO:0044422,GO:0044424,GO:0044434,GO:0044435,GO:0044444,GO:…	NOT SIGIFICANT	Zinc finger protein VAR3, chloroplastic OS=Arabidopsis thaliana OX=3702 GN=VAR3 PE=1 SV=2
Sb09g13740	1.09778	0.509416	-1.10768	0.00115376	0.0460803	GO:0003674,GO:0005215,GO:0005319,GO:0005575,GO:0005622,GO:0005623,GO:0005737,GO:0006810,GO:0006869,GO:0008150,GO:0009507,GO:0009526,GO:0009527,GO:0009528,GO:0009536,GO:0009706,GO:0009707,GO:0009941,GO:0010876,GO:0016020,GO:0019866,GO:0019867,GO:0031090,GO:0031967,GO:0031968,GO:0031969,GO:0031975,GO:0033036,GO:0042170,GO:0043226,GO:0043227,GO:0043229,GO:0043231,GO:0044422,GO:0044424,GO:0044434,GO:…	NOT SIGIFICANT	Protein TRIGALACTOSYLDIACYLGLYCEROL 1, chloroplastic OS=Arabidopsis thaliana OX=3702 GN=TGD1 PE=1 SV=1
Sb09g13770	3.77999	10.502	1.47421	0.0010938	0.0453529	NOT SIGIFICANT	NOT SIGIFICANT	NOT SIGIFICANT
Sb09g13830	5.88655	2.61935	-1.16821	0.000660494	0.0381664	NOT SIGIFICANT	NOT SIGIFICANT	Small heat shock protein C2 OS=Rickettsia felis (strain ATCC VR-1525 / URRWXCal2) OX=315456 GN=hspC2 PE=3 SV=1
Sb09g14590	57.8935	20.8465	-1.47359	0.00127199	0.0478969	GO:0000266,GO:0000278,GO:0000281,GO:0000910,GO:0000911,GO:0003674,GO:0003824,GO:0003924,GO:0005488,GO:0005515,GO:0005575,GO:0005622,GO:0005623,GO:0005737,GO:0006996,GO:0007005,GO:0007049,GO:0008017,GO:0008092,GO:0008150,GO:0009504,GO:0009987,GO:0015631,GO:0016043,GO:0016462,GO:0016787,GO:0016817,GO:0016818,GO:0017111,GO:0022402,GO:0032506,GO:0044424,GO:0044444,GO:0044464,GO:0048285,GO:0051301,GO:…	NOT SIGIFICANT	Dynamin-related protein 5A OS=Arabidopsis thaliana OX=3702 GN=DRP5A PE=2 SV=1
Sb09g14780	33.433	10.7276	-1.63994	0.000692043	0.0381625	GO:0003674,GO:0003676,GO:0003723,GO:0003824,GO:0004518,GO:0004519,GO:0005488,GO:0005575,GO:0005622,GO:0005623,GO:0006139,GO:0006725,GO:0006807,GO:0008150,GO:0008152,GO:0009451,GO:0009987,GO:0016070,GO:0016787,GO:0016788,GO:0034641,GO:0043170,GO:0043226,GO:0043227,GO:0043229,GO:0043231,GO:0043412,GO:0044237,GO:0044238,GO:0044424,GO:0044464,GO:0046483,GO:0071704,GO:0090304,GO:0090305,GO:0097159,GO:…	NOT SIGIFICANT	Pentatricopeptide repeat-containing protein At2g42920, chloroplastic OS=Arabidopsis thaliana OX=3702 GN=PCMP-E75 PE=2 SV=1
Sb09g15440	1.16992	0.147783	-2.98486	0.000576516	0.0351853	GO:0003674,GO:0005488,GO:0005575,GO:0005622,GO:0005623,GO:0005634,GO:0005730,GO:0005737,GO:0006810,GO:0006811,GO:0006812,GO:0006873,GO:0006875,GO:0008150,GO:0008270,GO:0009909,GO:0009910,GO:0009987,GO:0019725,GO:0030001,GO:0030003,GO:0031974,GO:0031981,GO:0042592,GO:0043167,GO:0043169,GO:0043226,GO:0043227,GO:0043228,GO:0043229,GO:0043231,GO:0043232,GO:0043233,GO:0044422,GO:0044424,GO:0044428,GO:…	NOT SIGIFICANT	Heavy metal-associated isoprenylated plant protein 3 OS=Arabidopsis thaliana OX=3702 GN=HIPP03 PE=1 SV=1
Sb0g00820	195.861	0.0107652	-14.1512	3.15808e-05	0.0116297	NOT SIGIFICANT	NOT SIGIFICANT	Arabinogalactan protein 16 OS=Arabidopsis thaliana OX=3702 GN=AGP16 PE=1 SV=1
Sb0g01370	98.699	14.4078	-2.77619	0.000109324	0.0185569	GO:0003674,GO:0005488,GO:0005515,GO:0005575,GO:0005622,GO:0005623,GO:0005737,GO:0005739,GO:0005856,GO:0008017,GO:0008092,GO:0009524,GO:0009536,GO:0009574,GO:0015630,GO:0015631,GO:0043226,GO:0043227,GO:0043228,GO:0043229,GO:0043231,GO:0043232,GO:0044422,GO:0044424,GO:0044430,GO:0044444,GO:0044446,GO:0044464	K16732	65-kDa microtubule-associated protein 6 OS=Arabidopsis thaliana OX=3702 GN=MAP65-6 PE=1 SV=1
Sb0g02360	0.769662	0.364706	-1.07749	0.000888128	0.0408821	GO:0003674,GO:0003824,GO:0004497,GO:0006629,GO:0008150,GO:0008152,GO:0008202,GO:0016125,GO:0016491,GO:0044238,GO:0055114,GO:0071704,GO:1901360,GO:1901615	K01723	Allene oxide synthase 3 OS=Solanum lycopersicum OX=4081 GN=AOS3 PE=1 SV=1	LOX-9途径的基因，与茉莉酸合成存在竞争关系
Sb0g02730	18.1718	4.27266	-2.08849	0.000483784	0.0327451	NOT SIGIFICANT	NOT SIGIFICANT	Protein saal1 OS=Danio rerio OX=7955 GN=saal1 PE=2 SV=2
Sb0g02860	0.00974371	3.59959	8.52915	0.000439079	0.0314847	NOT SIGIFICANT	K17471	Probable sulfate transporter 3.4 OS=Arabidopsis thaliana OX=3702 GN=SULTR3;4 PE=2 SV=1
Sb0g03160	1.11283	3.66039	1.71776	9.83822e-05	0.0173785	NOT SIGIFICANT	K20456	Oxysterol-binding protein-related protein 1C OS=Arabidopsis thaliana OX=3702 GN=ORP1C PE=2 SV=1	正调控稻瘟病抗性
Sb0g03190	1.51143	4.85209	1.68269	0.000632808	0.0370593	NOT SIGIFICANT	K12161	Ubiquitin-related modifier 1 homolog 2 OS=Arabidopsis thaliana OX=3702 GN=URM1-2 PE=3 SV=1
