# Supplementary material for: MeJA regulates the accumulation of baicalein and other 4’-hydroxyflavones during the hollowed root development in Scutellaria baicalensis
Source: Front Plant Sci. 2023 Jan 6;13:1067847. doi: 10.3389/fpls.2022.1067847 (PMC9853287; doi:10.3389/fpls.2022.1067847)
Supplement: Supplementary file 4 [file Table_3.xls]

## Sheet: Sheet1
Supplemental Table 3. Primers used in experiment. .
Primer Name	Primer Sequence (5' to 3')	Purpose
SbCHI qPCR F	AAGGCAGTAATAGAGAACAAACAG	qPCR analysis
SbCHI qPCR R	TTAAAACAACTCCGATAGTCTTG	qPCR analysis
SbCHS-2 qPCR F	GCAGTCCACTTATGCTGATTAC	qPCR analysis
SbCHS-2 qPCR R	GTGAAGTTGTCGTTCTCCTTC	qPCR analysis
SbCLL-7 qPCR F	ATTGAGGCCACCGTTGTATC	qPCR analysis
SbCLL-7 qPCR R	CGACTTTTGAAACCGTGGAT	qPCR analysis
SbF6H qPCR F	CTACGACGGAGCCTCGCTTG	qPCR analysis
SbF6H qPCR R	TGGCTCGCTGCAGCTCGATC	qPCR analysis
SbF8H qPCR F	ATTGGACGGAATTGTTGGA	qPCR analysis
SbF8H qPCR R	TCACTTCCACCCACAATCAA	qPCR analysis
SbFNSII-2 qPCR F	TCACCTATGGCGTCTCCTT	qPCR analysis
SbFNSII-2 qPCR R	CAGCTCCTCAGTGACGTTGA	qPCR analysis
SbPFOMT5 qPCR F	TTTGATGAATGTGCCTGCTGATGAGG	qPCR analysis
SbPFOMT5 qPCR R	CATGTTGGCCTTCTGAATGCTGG	qPCR analysis
Sb01g06320 qPCR F	TACGGTGTCACATGCAACGA	qPCR analysis
Sb01g06320 qPCR R	ATTGGGCCAACGAGGTTAGG	qPCR analysis
Sb01g16540 qPCR F	AACGTTGGGCGACAGATGAT	qPCR analysis
Sb01g16540 qPCR R	GCCAGAGTCGTCTTTCCGAT	qPCR analysis
Sb01g16570 qPCR F	TTCCCCGACCAAGGTAATGC	qPCR analysis
Sb01g16570 qPCR R	CGGCTACTGGCAGATTGTGA	qPCR analysis
Sb01g32610 qPCR F	AATCGACAAGCCTGGTAGCC	qPCR analysis
Sb01g32610 qPCR R	AAGTTGCTCCTTCTGGGACG	qPCR analysis
Sb01g53940 qPCR F	GGACTACGAAACGCAGGGAA	qPCR analysis
Sb01g53940 qPCR R	CTTGTGCCTTTCCATGTGCC	qPCR analysis
Sb08g10770 qPCR F	CACCCCTAACGCTCAACAGAT	qPCR analysis
Sb08g10770 qPCR R	GTGAGGCCAAGAGAATTGCG	qPCR analysis
Sb01g06320 CDS F	ATGCTACAAATTATCCTCTTC	Full-length cloning
Sb01g06320 CDS R	TCAAGATTTGCATGGATTTAAAG	Full-length cloning
Sb01g16540 CDS F	ATGGCGGAGGCGACTTTCTCTC	Full-length cloning
Sb01g16540 CDS R	CTAACTCATGATTCTAGCTCTTC	Full-length cloning
Sb01g16570 CDS F	ATGAATACAGGATTCGGAAAC	Full-length cloning
Sb01g16570 CDS R	TTAACTCATGATTCTAGCTCTTC	Full-length cloning
Sb01g32610 CDS F	ATGGAGAAAGGCAAAAGGTTGG	Full-length cloning
Sb01g32610 CDS R	TTACATGCTATGGTGTGGGTTTTGC	Full-length cloning
Sb01g53940 CDS F	ATGTTGATGTTAGTTAACTGCT	Full-length cloning
Sb01g53940 CDS R	TTACAGTGAAAATGGCTTC	Full-length cloning
Sb08g10770 CDS F	ATGGGAGTGCCAGGCATGAAGG	Full-length cloning
Sb08g10770 CDS R	TTAAGTTAACTTCATAGCTA	Full-length cloning
