# Supplementary material for: MeJA regulates the accumulation of baicalein and other 4’-hydroxyflavones during the hollowed root development in Scutellaria baicalensis
Source: Frontiers journal article supplement (doi:10.3389/fpls.2022.1067847), 2023-01-06
Supplement: Table_1.XLS [file Table_1.XLS]

## Sheet: Sheet1
Supplemental Table 1. data sets of metabolome results of 3 years roots with rotten heart.
Index	Q1 (Da)	Q3 (Da)	Molecular Weight (Da)	Formula	Ionization model	Compounds	2 years roots-1	2 years roots-2	2 years roots-3	3 years roots+RH -1	3 years roots+RH -2	3 years roots+RH -3	mix01	mix02	mix03	cpd_ID	kegg_map
Cmsn000894	361	211	362	C14H18O11	[M-H]-	7-O-Galloyl-D-sedoheptulose	1199	1514.9	2018.4	4033	4417.9	3870.2	3071	3301	2377
CWJP002833	1211.31	287.06	1211.31	C56H59O30+	[M]+	Cyanidin-3-O-(6''-O-malonyl)glucoside-7,3'-di-O-(6''-O-feruloyl)glucoside	9	1031	9	9	2620.1	4056.6	1514	1252	1304	--	--
CWJP002964	1151.29	287.06	1151.29	C54H55O28+	[M]+	Cyanidin-3-O-(6''-O-sinapoyl-2''-O-malonyl)glucoside-5-O-(6'''-O-malonyl)glucoside	9391.2	4787.5	14993	7846.1	12167	13040	11212	9976	11030	--	--
HJAP026	625	463	624	C28H32O16	[M+H]+	Chrysoeriol-6-C-glucoside-4'-O-glucoside	1138800	1375600	1551900	4924600	4195200	4193500	3201010	2964941	3208906
HJAP135	505.12	257.08	504.126	C24H24O12	[M+H]+	Pinocembrin-7-O-(6''-O-malonyl)glucoside	411710	760340	569960	262950	349560	1516900	626154	761006	732227	--	--
HJN005	285.08	139.04	286.084	C16H14O5	[M-H]-	5,2'-Dihydroxy-7-methoxyflavanone	131950	155360	174420	84490	51138	79657	107629	101470	100219	--	--
Hmcp001579	671.18	347.07	670.175	C29H34O18	[M+H]+	Limocitrin-3-O-sophoroside	270460	534050	457090	479740	516850	387630	442649	383288	433107	--	--
Hmcp001628	671.18	347.07	670.175	C29H34O18	[M+H]+	Limocitrin-3,7-di-O-glucoside*	256990	541070	418060	487070	458590	372570	498112	345954	482564	--	--
Hmcp002207	479	317	478	C22H22O12	[M+H]+	Isorhamnetin-7-O-glucoside (Brassicin)*	287990	399200	272340	1243300	684290	545270	668330	473317	665048
Hmgp002036	479	317	478	C22H22O12	[M+H]+	Nepetin-7-O-glucoside	251040	434040	290160	1173400	651640	503990	608505	646469	619773
Hmgp002189	463.13	301.07	462.118	C22H22O11	[M+H]+	Hispidulin-7-O-Glucoside	323390	499690	462240	411930	392180	894240	437852	404066	481112	C17762	--
Hmgp002238	493.14	331.08	492.128	C23H24O12	[M+H]+	Jaceosidin-7-O-Glucoside	673580	571400	697410	590480	532370	889840	682197	627779	551107	--	--
Hmhp004295	461.1	285.08	460.101	C22H20O11	[M+H]+	Wogonin-7-O-Glucuronide (Wogonoside)	9896300	9776300	9710700	2731700	2341100	2780700	5252822	7213723	6913894	--	--
Hmhp005160	331	316	330	C17H14O7	[M+H]+	Rehderianin I	258290	558490	448690	8043300	573120	1787200	1852742	1641802	1937799
Hmhp005222	305	225	304	C15H12O7	[M+H]+	Ganhuangemin (3,5,7,2',6'-Pentahydroxyflavanone)	751590	930930	920970	6073200	5974700	4052700	3235687	3568118	3531891
Hmhp005228	271	123	270	C15H10O5	[M+H]+	Norwogonin	4009700	4035200	4036600	13188000	12077000	12601900	9631032	8036373	7512366
Hmhp005335	273	169	272	C15H12O5	[M+H]+	Dihydrobaicalein	4538200	4834700	4700400	58427000	61287000	62047000	26269308	31596798	35675805
Hmhp005846	345.09	330.07	344.09	C18H16O7	[M+H]+	Tenaxin I	9076500	9483000	9790700	23318000	17868000	16004000	16365364	11761737	15365057	--	--
Hmhp006115	285.07	270.05	284.068	C16H12O5	[M+H]+	Oroxylin A (5,7-dihydroxy-6-methoxyflavone)	6081300	1687.59	1633.9	7232000	4559200	4478500	3527211	3100121	3367433	--	--
Hmhp006417	465.12	433.11	464.132	C22H24O11	[M+H]+	Scuteamoenoside	1687.59	1633.9	1134.8	3230.4	2427.6	2915.39	2047	2521	2573	--	--
Hmhp007382	359.1	344.09	358.105	C19H18O7	[M+H]+	Altisin	22127	43053	73178	89508	13593	1775.2	42394	35894	38009	--	--
Hmjp003123	479.08	303.06	478.075	C21H18O13	[M+H]+	Quercetin-5-O-glucuronide	873040	12435	8802.6	1102400	828980	891920	643321	667449	650743	--	--
Hmln000659	331.07	169.01	332.075	C13H16O10	[M-H]-	3-O-Galloyl-D-glucose*	363260	1377500	2179300	587880	726060	584900	1106572	969634	1095443	--	--
Hmln002189	549.09	505.11	550.096	C24H22O15	[M-H]-	Quercetin-3-O-(6''-malonyl)galactoside	12898	215460	428640	24061	15233	16969	96607	138455	99461	--	--
Hmln002199	505.1	300.03	506.107	C23H22O13	[M-H]-	Quercetin-3-O-(6''-acetyl)galactoside	6738.8	1171200	1932200	11898	9	4706.9	580103	589162	522915	--	--
Hmmp003156	595.16	313.07	594.158	C27H30O15	[M+H]+	Saponarin(Isovitexin-7-O-glucoside)	17273	33590	32823	164540	187400	109350	102357	98585	88034	C08064	--
Hmqn003268	303.05	151.03	304.059	C15H12O7	[M-H]-	5,7,3',4',5'-Pentahydroxydihydroflavone	198310	32644	54225	155590	78072	62367	81541	96983	114569	--	--
Hmxp006108	329.1	314.07	328.095	C18H16O6	[M+H]+	3-Hydroxy-5,7,8-trimethoxyflavone	43053	73178	56876	19834	14777	36638	39107	44309	39286	--	--
Hmxp006586	329.1	299.05	328.095	C18H16O6	[M+H]+	5-Hydroxy-7,3’,4’-trimethoxyflavone	1070700	28405	51856	1401000	503180	1693300	765666	802771	653630	--	--
Hmxp007521	315.09	300.06	314.079	C17H14O6	[M+H]+	3’,4’-Dihydroxy-7,5’-dimethoxyflavone	162550	7045	9855.7	106510	20259	115650	68371	67826	57872	--	--
Li512111	519.11	315.05	520.122	C24H24O13	[M-H]-	Isorhamnetin-3-O-(6''-acetylglucoside)	26576	59692	91551	37893	44399	48387	41885	59938	58809	--	--
Lmbp002336	611.16	303.05	610.153	C27H30O16	[M+H]+	Quercetin-3-O-(2''-O-rhamnosyl)galactoside	11510	1244800	1191600	31949	14032	11216	393877	437706	438276	--	--
Lmdn003665	623.2	299.09	624.205	C29H36O15	[M-H-	Farrerol-5,7-di-O-glucoside	12435	8802.6	14224	44786	23889	84819	31079	37509	34802	--	--
Lmdp003808	317.07	302.04	316.058	C16H12O7	[M+H]+	Azaleatin (5-O-Methylquercetin)	132870	2727.6	3849.2	440110	130110	67158	107169	138111	123701	C10022	--
Lmfn000604	331.07	169.01	332.074	C13H16O10	[M-H]-	6-O-Galloyl-D-glucose*	333650	38981	30133	557420	677110	520180	418874	331626	382657	--	--
Lmfp001509	317.09	153.02	316.079	C13H16O9	[M+H]+	1-O-Galloyl-rhamnose	5786.7	5727600	5229500	16120	15917	5187.3	1702972	1478891	2137602	--	--
Lmhp002832	549.16	411.11	548.153	C26H28O13	[M+H]+	Chrysin-6-C-arabinoside-8-C-glucoside	3603300	200840	313030	4473200	4135500	4038100	2674666	3248327	2930459	--	--
Lmjn005592	343.08	313.04	344.09	C18H16O7	[M-H]-	Cirsilineol (4',5-Dihydroxy-3',6,7-trimethoxyflavone)	1377500	2179300	1830200	5733200	3582100	3678600	3300194	2967959	3673038	C10032	--
Lmjp002906	479.12	317.07	478.111	C22H22O12	[M+H]+	Rhamnetin-3-O-Glucoside	215460	428640	313480	1281900	654820	464420	643744	622004	547572	--	--
Lmjp003295	479.12	317.07	478.111	C22H22O12	[M+H]+	6-Methoxykaempferol-3-O-glucoside	347410	7757700	9288000	617270	574480	793850	3120615	2595742	2877572	--	--
Lmjp003655	463.12	301.08	462.116	C22H22O11	[M+H]+	6-C-MethylKaempferol-3-glucoside	274300	4120400	4320300	330600	271040	637080	1659913	1829074	1508067	--	--
Lmjp005690	375.11	314.08	374.1	C19H18O8	[M+H]+	Chrysosplenetin (Quercetagetin-3,6,7,3'-tetramethyl ether)	768080	16663	21223	114900	120140	404910	246289	226421	288528	C10030	--
Lmlp005572	433.11	271.06	432.106	C21H20O10	[M+H]+	Galangin-7-O-glucoside	1171200	1932200	1682500	3918000	3702200	5874300	3603088	2447676	3268202	--	--
Lmmn004912	315.05	271.02	316.058	C16H12O7	[M-H]-	3-O-Methylquercetin	24055	16336	24254	27787	47465	17978	21726	25443	24500	C04443	ko00944
Lmmp002795	463.12	301.07	462.115	C22H22O11	[M+H]+	Pratensein-7-O-glucoside	20307000	9849000	7410700	13212000	16795000	20940000	12506199	16818627	15184941	--	--
Lmmp003767	463.09	287.05	462.08	C21H18O12	[M+H]+	Kaempferol-7-O-glucuronide*	12231000	816440	962440	13876000	15589000	12792000	10157956	9378127	8478318	--	--
Lmmp005125	271.1	167.03	270.089	C16H14O4	[M+H]+	Pinostrobin Chalcone	5027000	8714500	7981400	21596600	20652061	21595383	12091266	15279325	15981031	--	--
Lmnp002762	639.2	477.14	638.185	C29H34O16	[M+H]+	Cirsimaritin-8-C-[glucosyl-(1-2)]-glucoside	190070	48869	63601	326450	290840	441690	189533	195787	252535	--	--
Lmsp008681	331.12	197.05	330.11	C18H18O6	[M+H]+	5-Hydroxy-7,8,4'-Trimethoxyflavanone	4306.3	761400	1073700	91726	7591.5	25483	321320	342259	317197	--	--
Lmsp009245	347.11	197.05	346.105	C18H18O7	[M+H]+	3',5-Dihydroxy-4',6,7-Trimethoxyflavanone	32644	54225	46470	46600	44984	72459	41575	50345	46175	--	--
Lmsp009394	375.14	211.07	374.137	C20H22O7	[M+H]+	3',4',5,6,7-Pentamethoxyflavanone	296590	11602	12954	664480	338120	351230	327938	257041	228643	--	--
Lmsp009872	343.12	299.09	342.11	C19H18O6	[M+H]+	5,7,3',4'-Tetramethoxyflavone	3657.1	4062	4742.9	6768.8	7433.1	2847.8	5183	5089	5505	--	--
Lmtn002796	449.1	287.05	450.116	C21H22O11	[M-H]-	Aromadendrin-7-O-glucoside	333320	25364	47294	702390	383550	371360	311660	297298	283506	--	--
Lmtp002474	565.16	427.1	564.148	C26H28O14	[M+H]+	Apigenin-6-C-(2''-glucosyl)arabinoside	15504000	6119500	10132000	22525000	25190000	26263000	20658187	14427440	15448509	--	--
Lmtp003677	627.16	303.04	626.148	C27H30O17	[M+H]+	Quercetin-3-O-sophoroside (Baimaside)*	28405	51856	45527	128500	158660	172470	101745	108667	106710	C12667	ko00944
Lmtp004044	597.14	303.04	596.138	C26H28O16	[M+H]+	Quercetin-3-O-apiosyl(1→2)galactoside	7045	9855.7	7300.4	12374	4061.1	6770.2	8373	8509	7788	--	--
Lmwp003442	449.11	287.06	448.101	C21H20O11	[M+H]+	Amoenin	673490	2156300	4306100	1331900	793510	755140	1492760	1431474	1845868	--	--
Lmxn007456	359.08	329.03	360.085	C18H16O8	[M-H]-	Acerosin	1744300	154340	198400	2030100	1410700	1857400	1084028	1019450	1239354	C09982	--
Lmxn007955	359.08	329.03	360.085	C18H16O8	[M-H]-	Sudachitin	59692	91551	89325	582980	372760	379880	239883	258565	261774	--	--
Lmyn006227	269.05	151	270.053	C15H10O5	[M-H]-	Galangin (3,5,7-Trihydroxyflavone)*	1244800	1191600	1918600	50790	38654.5	40456	862339	895607	714053	C10044	ko00941
Lmyp003139	617.11	153.02	616.106	C28H24O16	[M+H]+	Quercetin-3-O-(6''-galloyl)galactoside	1823.6	167470	163400	11582	4873.4	11571	70423	57641	67866	--	--
Lmyp004444	479.12	317.06	478.111	C22H22O12	[M+H]+	Tricin-4'-methylether-3'-O-glucoside	246780	425670	297820	1157900	638170	462910	633017	574103	447329	--	--
Lmyp005328	595.14	131.05	594.137	C30H26O13	[M+H]+	Quercetin-3-O-(2''-cinnamoyl)Glucoside	2727.6	3849.2	2984.9	10469	10824	13990.6	8212	6464	8590	--	--
Lmyp005841	417.12	255.06	416.111	C21H20O9	[M+H]+	Chrysin-7-O-glucoside	38981	30133	34225	49345	42148	45262	32088	40062	45195	--	--
Lmzn001664	623.13	447.1	624.133	C27H28O17	[M-H]-	Kaempferol-3-O-glucuronide-7-O-glucoside	65355	9482.1	9187.2	34472	40736	29780	35637	30829	31203	--	--
Lmzn001894	461.07	285.04	462.08	C21H18O12	[M-H]-	Kaempferol-3-O-glucuronide*	5727600	5229500	4332600	8578600	11917000	12171000	8274915	8741673	7068770	--	--
Lmzp004885	331.08	315.05	330.074	C17H14O7	[M+H]+	Tricin (5,7,4'-Trihydroxy-3',5'-dimethoxyflavone)	200840	313030	253680	867720	350640	214610	343389	318512	338009	C10193	--
mws0024	169.01	125	170.022	C7H6O5	[M-H]-	Gallic acid	48158	150089	127380	48616	9	29802	65428	78528	63714	C01424	--
mws0032	319.04	153	318.038	C15H10O8	[M+H]+	Myricetin	21186	27280	31978	5467	5615.5	7971.4	15175	13851	13531	C10107	ko00941,ko00944,ko01110
mws0036	609.18	301.09	610.19	C28H34O15	[M-H]-	Hesperetin-7-O-rutinoside (Hesperidin)	8169.3	152240	205700	8711.2	6355.7	5043.9	54064	55283	54064	C09755	--
mws0038	313.07	283	314.079	C17H14O6	[M-H]-	Kumatakenin	6389500	6252400	8601100	17112000	16961100	17167700	11392002	10623078	10588227	--	--
mws0040	255.07	153	254.058	C15H10O4	[M+H]+	Chrysin	7757700	9288000	10804000	33195200	32491000	36326000	20975953	22858417	21373507	C10028	ko00941
mws0041	271.06	123.01	270.053	C15H10O5	[M+H]+	Baicalein	4120400	4320300	4270100	10421200	10188600	10723500	8173382	7511032	6431364	C10023	--
mws0044	303.05	125.02	304.058	C15H12O7	[M-H]-	Dihydroquercetin(Taxifolin)	292590	444250	559210	633380	292830	313360	345379	431216	417912	C01617	ko00941,ko01100,ko01110
mws0045	449.11	303.05	448.101	C21H20O11	[M+H]+	Quercetin-3-O-rhamnoside(Quercitrin)	16663	21223	22303	6142.8	75734	15759	26448	24755	29794	C01750	ko00944
mws0048	431.1	311	432.106	C21H20O10	[M-H]-	Apigenin-8-C-Glucoside (Vitexin)*	598310	30744	42211	1098800	1100900	766010	715734	630581	641162	C01460	ko00941,ko00944
mws0049	307.08	139	306.074	C15H14O7	[M+H]+	Gallocatechin	1966.6	11467	12161	1640.1	3576	2854.3	5231	5075	6669	C12127	ko00941,ko01110
mws0052	447.09	271.07	446.085	C21H18O11	[M+H]+	Baicalin	9281900	34367	60479	4113800	4143500	3928600	3931433	3784224	2884019	C10025	--
mws0054	289.07	245	290.079	C15H14O6	[M-H]-	Catechin	5643.7	37399	62920	5531.9	9	9	20270	17613	20758	C06562	ko00941,ko01110
mws0057	451.12	289	450.116	C21H22O11	[M+H]+	Eriodictyol-7-O-glucoside	109790	6406500	11446000	287820	138140	222800	2784732	3412114	2500569	--	--
mws0058	299.06	284	300.063	C16H12O6	[M-H]-	Diosmetin (5,7,3'-Trihydroxy-4'-methoxyflavone)	561400	591780	760300	371380	19843	126990	406088	476782	470597	C10038	--
mws0061	463.09	300	464.095	C21H20O12	[M-H]-	Quercetin-3-O-galactoside (Hyperin)*	84033	118260	212370	90963	50697	84193	100893	116202	120254	C10073	--
mws0064	287.06	135	288.063	C15H12O6	[M-H]-	Eriodictyol (5,7,3',4'-Tetrahydroxyflavanone)	165120	258640	248650	1190900	155850	347380	331544	397376	457227	C05631	ko00941,ko01100,ko01110
mws0066	315.05	151	316.058	C16H12O7	[M-H]-	Isorhamnetin	16336	24254	25458	61515	50122	27171	29352	38783	34423	C10084	--
mws0071	415.1	269.05	416.111	C21H20O9	[M-H]-	Apigenin-4'-O-rhamnoside	103380	2067900	3559600	95920	4714.4	12875	1075555	1023855	1075107	--	--
mws0072	433.11	271.01	432.106	C21H20O10	[M+H]+	Apigenin-5-O-glucoside	9849000	7410700	10244000	24947000	20039000	31677000	19213351	15301046	20554045	--	--
mws0091	463.09	300.03	464.095	C21H20O12	[M-H]-	Quercetin-3-O-glucoside (Isoquercitrin)*	57331	119040	199340	43624	33265	45839	78752	90039	93451	C05623	ko00944,ko01100,ko01110
mws0129	285.08	270	284.068	C16H12O5	[M+H]+	Genkwanin (Apigenin 7-methyl ether)	25250000	9777.9	17729	15342000	9878200	15159000	8812579	11030878	11638551	C10046	--
mws0355	441.08	169.02	442.09	C22H18O10	[M-H]-	Catechin gallate	9842.4	1527000	2622100	24786	16912	29631	800642	591092	577577	--	--
mws0789	255.07	151	256.074	C15H12O4	[M-H]-	Pinocembrin (Dihydrochrysin)	816440	962440	874220	2395020	2968800	2378880	1793497	1875000	1407207	C09827	ko00941
mws0913	447.09	285	448.101	C21H20O11	[M-H]-	Kaempferol-3-O-galactoside (Trifolin)	317310	354920	313140	623980	227580	736990	372534	454378	488595	C12626	ko00944
mws0914	271.06	151	272.068	C15H12O5	[M-H]-	Pinobanksin	48869	63601	70566	118639	114165	215721	120153	88213	101508	C09826	ko00941
mws0917	329.07	314	330.074	C17H14O7	[M-H]-	3,7-Di-O-methylquercetin	7659900	3917.2	3791	12783000	7029300	6280800	5651907	5412195	4912822	C01265	ko00944
mws0920	301.04	151	302.043	C15H10O7	[M-H]-	Tricetin (5,7,3',4',5'-Pentahydroxyflavone)	111630	15428	19207	181240	60895	22367	59026	62279	62303	C10192	ko00941
mws1002	345.06	330	346.069	C17H14O8	[M-H]-	Syringetin	6180000	391690	339430	14646000	4932200	7404400	4528439	4639385	5667118	C11620	ko00944
mws1003	331.05	151	332.053	C16H12O8	[M-H]-	Laricitrin	15337	4622300	4152100	54654	26926	23682	1774095	1389266	1578606	C12633	ko00944
mws1033	303.09	153.02	302.079	C16H14O6	[M+H]+	Homoeriodictyol	21718	343450	505780	23830	37312	22909	147182	130128	155960	C09756	ko00941
mws1068	285.04	151	286.048	C15H10O6	[M-H]-	Kaempferol (3,5,7,4'-Tetrahydroxyflavone)	1768300	80719	82097	2699300	1461600	1070300	1191658	1210044	1295988	C05903	ko00941,ko00944,ko01100,ko01110
mws1073	595.17	457.2	594.158	C27H30O15	[M+H]+	Apigenin-6,8-di-C-glucoside (Vicenin-2)	761400	1073700	1013900	1483900	1344900	1779600	1217768	1104520	1183462	C10195	--
mws1173	271.06	242.7	272.068	C15H12O5	[M-H]-	Garbanzol	71154	687330	653700	107770	222520	257240	392947	268740	330753	C09751	ko00941
mws1174	313.07	253	314.079	C17H14O6	[M-H]-	3-O-Acetylpinobanksin	21546	33617	32775	25212	24308	25617	22224	31096	25385	C16418	ko00941
mws1178	271.1	134.8	272.105	C16H16O4	[M-H]-	Vestitol	11602	12954	11810	70407	99559	62198	51932	40537	49338	C16225	ko00943
mws1179	433.11	271	434.121	C21H22O10	[M-H]-	Naringenin-7-O-glucoside (Prunin)	448640	1260700	1437400	502670	303500	811190	851784	695201	782703	C09099	ko00941
mws1290	593.13	285	594.137	C30H26O13	[M-H]-	Kaempferol-3-O-(6''-p-coumaroyl)glucoside (Tiliroside)	9662.3	14160	9466	8459.2	4204.3	5295.5	9080	9010	9833	C17140	--
mws1299	449.11	299.2	448.101	C21H20O11	[M+H]+	Luteolin-8-C-glucoside (Orientin)	388330	589450	478100	793550	775650	1024800	725833	673266	738605	C10114	--
mws1329	463.09	300.7	464.095	C21H20O12	[M-H]-	Quercetin-7-O-glucoside*	12388	21695	13169	26342	42215	9	21721	20931	22366	C12639	--
mws1360	433.11	269.1	434.121	C21H22O10	[M-H]-	Engeletin	520730	912420	658120	87984	81048	114590	441271	434278	395703	--	--
mws1434	431.1	311	432.106	C21H20O10	[M-H]-	Apigenin-6-C-glucoside (Isovitexin)*	540920	779340	579440	1021200	1050300	812210	768303	652575	739287	C01714	ko00944
mws1454	477.14	315	478.148	C23H26O11	[M-H]-	Persicoside	25364	47294	37075	7651.7	7093.9	4010.4	24036	22238	17616	--	--
mws1474	345.1	284	344.09	C18H16O7	[M+H]+	5,7-Dihydroxy-3',4',5'-trimethoxyflavone	6119500	10132000	8510500	21250000	19768200	14536000	10971461	12085488	14306967	C19807	--
mws1519	595.17	287.06	596.174	C27H32O15	[M-H]-	Eriodictyol-7-O-Rutinoside (Eriocitrin)	8315.9	14892	13082	8053.7	12390	9	9469	7835	9383	C09732	--
mws1608	447.09	357.1	448.101	C21H20O11	[M-H]-	Luteolin-6-C-glucoside (Isoorientin)*	117010	168310	149360	132430	199600	465940	173891	191510	207192	C01821	--
mws1660	565.16	529.13	564.123	C26H28O14	[M+H]+	Schaftoside	60820	87596	76438	99479	83581	95062	91554	88862	81544	C10181	--
mws1661	609.18	301	608.174	C28H32O15	[M+H]+	Diosmetin-7-O-rutinoside (Diosmin)	45416	46797	45594	37457	28377	42721	47580	40221	42079	C10039	--
mws1662	269.08	226	268.074	C16H12O4	[M+H]+	Tectochrysin	6687.1	10137	10283	26595	21840	2513.6	15365	11448	14505	C11621	--
mws2118	435.13	166.7	436.137	C21H24O10	[M-H]-	Phloretin-2'-O-glucoside (Phlorizin)	35792	66861	46094	19029	6228.7	2426.1	28261	23673	30345	C01604	ko00941,ko01110
mws2209	449.11	287.06	448.101	C21H20O11	[M+H]+	Kaempferol-3-O-glucoside (Astragalin)	2125500	4271800	3366100	5931100	1189800	1780600	2764010	3700389	3457343	C12249	ko00944,ko01110
mws2220	457.08	169.02	458.085	C22H18O11	[M-H]-	Gallocatechin 3-O-gallate	104550	147160	150350	191700	102580	208120	122131	124038	155854	--	--
mws4057	253.05	117	254.058	C15H10O4	[M-H]-	7,4'-Dihydroxyflavone	19700	24417	22687	13200	11961	16472	16559	15867	14470	C12123	ko00941,ko00943
mws4160	285.08	270.07	284.068	C16H12O5	[M+H]+	Wogonin (5,7-Dihydroxy-8-Methoxyflavone)	6515300	9830400	9768100	27238800	24875800	24971000	19313627	18919955	18472354	C10197	--
mws4167	463.09	287.06	462.08	C21H18O12	[M+H]+	Luteolin-7-O-glucuronide	993720	903820	971530	1642100	2520800	2271500	1654676	1473606	1673843	C03515	ko00944
pmb0541	697.16	287.06	697.161	C30H33O19+	[M]+	Cyanidin-3-O-(6''-O-malonyl)glucoside-5-O-glucoside	9	923.38	1303.6	2069.7	4428.6	3377.1	1681	2358	2254	--	--
pmb0545	477.14	315.09	477.139	C23H25O11+	[M]+	Rosinidin-3-O-glucoside	15871	29390	17663	26687	9	14157	16605	14666	18018	--	--
pmb0550	449.11	287.06	449.108	C21H21O11+	[M]+	Cyanidin-3-O-glucoside (Kuromanin)	60811	139000	100270	177850	9	137450	99803	117402	117162	C08604	ko00942
pmb0562	605.11	271.06	605.114	C27H25O16+	[M]+	Pelargonidin-3-O-(3'',6''-O-dimalonylglucoside)	33529	40105	38682	29009	39302	43950	43918	35927	32945	C16288	ko00942
pmb0565	509.13	347.08	508.122	C23H24O13	[M+H]+	Syringetin-3-O-glucoside	2156300	4306100	3494400	42494000	4408400	4532900	10759259	11822081	10532856	--	--
pmb0566	581.15	383.2	580.143	C26H28O15	[M+H]+	Luteolin-7-O-glucoside-5-O-arabinoside	21783	24535	23913	40399	52494	35198	38383	33200	39659	--	--
pmb0571	565.16	271.6	564.148	C26H28O14	[M+H]+	Apigenin-7-O-(2''-glucosyl)arabinoside	154340	198400	210170	366930	456950	325150	320064	298663	298595	--	--
pmb0578	655.17	207	654.158	C32H30O15	[M+H]+	Luteolin-7-O-(6''-sinapoyl)glucoside	10865	17136	12173	6485.5	6193	9	7190	7599	8517	--	--
pmb0579	669.18	207	668.174	C33H32O15	[M+H]+	Chrysoeriol-7-O-(6''-sinapoyl)glucoside	14057	17542	16478	23971	23717	23508	22307	18663	16621	--	--
pmb0587	639.16	477	638.148	C28H30O17	[M+H]+	Chrysoeriol-7-O-(2''-O-glucuronyl)glucoside	235020	290430	297730	419210	466140	562620	402216	377208	443309	--	--
pmb0603	625.18	301.6	624.169	C28H32O16	[M+H]+	Chrysoeriol-7,4'-di-O-glucoside*	167470	163400	235570	713550	783430	722530	400402	407137	471667	--	--
pmb0608	549.12	301.4	548.117	C25H24O14	[M+H]+	Chrysoeriol-7-O-(6''-malonyl)glucoside	478830	569950	689420	370970	535100	712720	522095	643426	461134	--	--
pmb0624	611.16	431.3	610.153	C27H30O16	[M+H]+	Luteolin-6-C-glucoside-7-O-glucoside	9	9	4124.3	9691.3	11535	4993.2	5590	4948	5299	--	--
pmb0626	757.22	433.4	756.211	C33H40O20	[M+H]+	Apigenin-6-C-glucoside-7-O-Sophoroside*	941.66	9	9	28949	7772.7	36292	10508	9931	13443	--	--
pmb0628	613.18	451.1	612.169	C27H32O16	[M+H]+	Eriodictyol-8-C-glucoside-4'-O-glucoside	26961	38544	46251	12115	9	7321.1	24348	21870	23714	--	--
pmb0631	581.15	515.4	580.143	C26H28O15	[M+H]+	Orientin-6-C-arabinoside	39992	59237	50069	32495	54372	146730	58613	60024	56384	--	--
pmb0636	581.15	431.3	580.143	C26H28O15	[M+H]+	Luteolin-8-C-glucoside-7-O-arabinoside*	42888	46467	41271	27099	53999	123870	46062	63549	45094	--	--
pmb0639	757.22	595.2	756.211	C33H40O20	[M+H]+	Apigenin-8-C-glucoside-7-O-Sophoroside	7139.1	15714	14333	29993	53720	24424	24544	24944	21217	--	--
pmb0645	627.19	465.2	626.185	C28H34O16	[M+H]+	Hesperetin-6-C-glucoside-7-O-glucoside	76546	81903	90132	172180	236910	330890	138999	149147	146284	--	--
pmb0662	787.21	463.1	786.201	C37H38O19	[M+H]+	Luteolin-6-C-glucoside-7-O-(6''-feruloyl)glucoside	9482.1	9187.2	14912	29629	41105	46466	20634	20308	29815	--	--
pmb0676	801.22	207.1	800.216	C38H40O19	[M+H]+	Chrysoeriol-8-C-glucoside-7-O-(6''-feruloyl)glucoside	1352.4	9	2266.9	7880.7	9213.1	6935.7	4889	3716	5077	--	--
pmb0678	771.21	177.1	770.206	C37H38O18	[M+H]+	Apigenin-8-C-glucoside-7-O-(6''-feruloyl)glucoside	7109.2	12467	10565	4189.4	6716.6	10715	7100	9145	9791	--	--
pmb0713	655.19	331.08	654.18	C29H34O17	[M+H]+	Tricin-7-O-(2''-O-glucosyl)glucoside	585110	555990	898290	1041300	1901000	2845600	1240950	1127728	1469580	--	--
pmb0725	669.18	331.08	668.174	C33H32O15	[M+H]+	Tricin-7-O-(2''-feruloyl)glucoside	9	9	9	2997.6	10979	26664	6329	6471	6778	--	--
pmb0736	493.13	331.08	492.127	C23H24O12	[M+H]+	Tricin-7-O-Glucoside	763180	809020	1403900	631120	496670	528190	770385	693103	769701	--	--
pmb0739	659.2	331.08	658.19	C32H34O15	[M+H]+	Tricin-4'-O-(syringyl alcohol)ether-7-O-glucoside	17102	62602	31610	22634	9	4470.1	21617	22655	22767	--	--
pmb1108	773.21	593	772.206	C33H40O21	[M+H]+	Luteolin-6,8-di-C-glucoside-7-O-glucoside	2776.9	3066.9	2478.5	2332.3	3576.7	2941.1	2631	2649	2755	--	--
pmb2961	547.11	503.1	549.124	C25H25O14+	[M-2H]-	Peonidin-3-O-(6''-O-malonyl)glucoside	150089	127380	102430	13587	9034.6	11850	77238	82572	56383	--	--
pmb2962	473.11	269.05	475.124	C23H23O11+	[M-2H]-	Pelargonidin-3-O-(6''-O-acetyl)glucoside	20004	43901	51094	4923.3	6460.8	12889	24285	21013	23067	--	--
pmb2970	625.18	565.3	626.185	C28H34O16	[M-H]-	Hesperetin-5,7-di-O-glucoside	152240	205700	246620	887860	544870	645350	528940	416237	386943	--	--
pmb2991	739.21	269.2	740.216	C33H40O19	[M-H]-	Apigenin-7-O-glucoside-4'-O-rutinoside	17640	29095	33925	19809	41285	14274	30122	23090	27558	--	--
pmb2997	799.19	461.1	800.201	C34H40O22	[M-H]-	Chrysoeriol-7-O-Sophoroside-5-O-glucuronide	9	9	2636.8	4260.4	9	7249.4	2293	2211	2768	--	--
pmb2999	461.11	299.1	462.116	C22H22O11	[M-H]-	Chrysoeriol-5-O-glucoside*	209100	284940	210040	288830	219720	116840	206662	204310	252027	--	--
pmb3000	503.12	341.1	504.127	C24H24O12	[M-H]-	Chrysoeriol-7-O-(6''-acetyl)glucoside	4717.1	3628.2	4982.1	5506.6	7875.9	3961.3	4559	5958	5266	--	--
pmb3002	607.17	299	608.174	C28H32O15	[M-H]-	Chrysoeriol-7-O-rutinoside	12768	13203	14547	40228	31147	35557	19998	26750	21235	--	--
pmb3006	431.1	269.1	432.106	C21H20O10	[M-H]-	Apigenin-7-O-glucoside(Cosmosiin)	2971800	3572100	2394700	3123200	2702000	3017400	3131745	2985165	2469841	C04608	ko00944
pmb3012	461.11	299.2	462.116	C22H22O11	[M-H]-	Chrysoeriol-7-O-glucoside*	604100	681680	924340	768710	752090	1561500	1030738	740843	911939	--	--
pmb3019	463.1	299.2	464.111	C25H20O9	[M-H]-	Chrysoeriol-7-O-homovanillic acid	31416	17932	22321	9	9	13688	12796	12552	12379	--	--
pmb3023	449.11	287	450.116	C21H22O11	[M-H]-	Eriodictyol-8-C-glucoside	145340	240160	202610	275130	172320	143290	168730	168284	173212	--	--
pmb3039	703.13	329.2	704.138	C35H28O16	[M-H]-	Tricin-4'-O-oxalic acid-7-O-(p-coumaroyl)shikimic acid	1273.9	1060	1695.4	829.66	1165	441.95	1155	1094	1268	--	--
pmb3041	521.09	329.2	522.101	C23H22O14	[M-H]-	Tricin-7-O-saccharic acid	348790	436630	519600	441450	246010	490630	348792	340307	355262	--	--
pmb3042	491.12	329.1	492.127	C23H24O12	[M-H]-	Tricin-5-O-Glucoside	5988700	9696600	8002600	19497000	17250000	16177000	12557723	11686228	12019464	--	--
pmb3045	505.1	329.1	506.106	C23H22O13	[M-H]-	Tricin-7-O-Glucuronide	251140	278470	230960	489710	659790	625360	402524	344577	470593	--	--
pme0088	285.04	151	286.048	C15H10O6	[M-H]-	Luteolin (5,7,3',4'-Tetrahydroxyflavone)	444250	559210	569170	22988000	3343400	10246000	6293709	7445242	6197592	C01514	ko00941,ko00944,ko01100,ko01110
pme0376	271.06	151	272.068	C15H12O5	[M-H]-	Naringenin (5,7,4'-Trihydroxyflavanone)	47974	60888	68814	120223	134799	112391	88742	97329	80643	C00509	ko00941,ko00943,ko01100,ko01110
pme0443	493.13	331.08	493.134	C23H25O12+	[M]+	Malvidin-3-O-galactoside (Primulin)*	213630	369330	338270	530820	145780	76713	258434	328811	255407	--	--
pme0444	493.13	331.08	493.134	C23H25O12+	[M]+	Malvidin-3-O-glucoside (Oenin)	114460	174310	150090	238320	53995	34251	105406	120073	152714	C12140	ko00942
pme1398	465.1	303.05	465.103	C21H21O12+	[M]+	Delphinidin-3-O-glucoside (Mirtillin)	9	38814	21935	62739	263290	62509	61862	69914	69883	C12138	ko00942
pme1598	463.12	301	464.132	C22H24O11	[M-H]-	Hesperetin-5-O-glucoside	69815	91796	87170	123130	125870	108760	95839	85713	111053	--	--
pme2459	449.11	287.2	448.101	C21H20O11	[M+H]+	Luteolin-7-O-glucoside (Cynaroside)	60051	78626	71910	42340	34350	155330	71245	69363	75355	C03951	ko00944
pme2493	579.17	287.1	578.164	C27H30O14	[M+H]+	Kaempferol-3,7-O-dirhamnoside (Kaempferitrin)	2574.7	6460.3	3539.7	18218	4851.3	3543.8	6546	7438	5592	C16981	--
pme2954	303.05	137.02	302.043	C15H10O7	[M+H]+	Quercetin	30744	42211	33822	124531	126049	129868	96676	95777	91465	C00389	ko00941,ko00944,ko01100,ko01110
pme3227	579.17	433	578.164	C27H30O14	[M+H]+	Vitexin-2''-O-rhamnoside	38254	47954	38707	39893	41595	40277	33281	49248	39690	C12628	ko00944
pme3391	479.12	317.07	479.118	C22H23O12+	[M]+	Petunidin-3-O-glucoside	72014	155640	103720	49218	106790	9	85118	76212	95738	C12139	ko00942
pme3392	433.11	271.06	433.113	C21H21O10+	[M]+	Pelargonidin-3-O-glucoside	11467	12161	25636	53397	46994	45023	36618	28787	33386	C12137	ko00942,ko01100,ko01110
pme3475	273.08	153	272.068	C15H12O5	[M+H]+	Butin	34367	60479	55757	117919	103734	113967	66844	74504	83213	C09614	ko00941
pmf0027	449.11	287.06	449.108	C21H21O11+	[M]+	Cyanidin-3-O-galactoside	57103	159330	117420	214700	9	146940	98000	120582	115077	C08647	--
pmf0116	627.16	303.05	627.156	C27H31O17+	[M]+	Delphinidin-3,5-di-O-glucoside	1262.2	1194	1008.4	10035	36867	10751	9247	11177	10842	C16312	ko00942
pmf0203	463.12	301.07	463.123	C22H23O11+	[M]+	Peonidin-3-O-glucoside	381480	673970	498740	463130	384020	9	462247	351808	460769	C12141	ko00942
pmf0392	317.1	167.04	316.095	C17H16O6	[M+H]+	Persicogenin (5,3'-dihydroxy-7,4'-dimethoxyflavanone)	37399	62920	56490	100640	163930	25755	89065	61423	60187	--	--
pmf0615	641.17	317.07	641.171	C28H33O17+	[M]+	Petunidin-3,5-di-O-glucoside	5693.1	7481.7	9195.5	12188	9853.6	3463.7	7988	6636	8097	--	--
pmn001518	331.07	169.01	332.074	C13H16O10	[M-H]-	1-O-Galloyl-D-glucose	43397	63233	90915	71879	114800	45950	75646	57493	63331	C01158	--
pmn001533	645.13	169	646.138	C26H30O19	[M-H]-	2-O-Di-gallic acyl-Glucoside-Glucoside	1512.3	2640.9	3083.9	1306.5	1991.9	1276.8	2335	1734	2139	--	--
pmn001583	609.15	300	610.153	C27H30O16	[M-H]-	Quercetin-3-O-robinobioside	7836.6	9	9	9	2613.2	4826.9	2548	2420	2958	--	--
pmn001637	417.08	285	418.09	C20H18O10	[M-H]-	Kaempferol-3-O-arabinoside (Juglanin)	9	9	2170.9	4022.1	9	9	1095	1232	1131	--	--
pmn001641	475.09	300	476.095	C22H20O12	[M-H]-	Kaempferide-3-O-glucuronide	30517	37825	34599	13201	12552	11627	25159	21694	19736	--	--
pmn001642	503.08	459.1	504.09	C23H20O13	[M-H]-	Kaempferol-3-O-(2''-O-acetyl)glucuronide	72603	90468	96756	80751	49876	81862	69383	76335	94093	--	--
pmn001644	519.08	300	520.085	C23H20O14	[M-H]-	Quercetin-3-O-(2''-acetyl)glucuronide	10675	16757	13836	9754.6	15245	18586	14290	16748	13841	--	--
pmp000001	301.07	286.05	300.063	C16H12O6	[M+H]+	Hispidulin (5,7,4'-Trihydroxy-6-methoxyflavone)	3703400	3853400	3934000	2595300	1610600	2405300	3369204	2483615	3259093	C10058	--
pmp000003	317.07	302.04	316.058	C16H12O7	[M+H]+	Nepetin (5,7,3',4'-Tetrahydroxy-6-methoxyflavone)	1842800	2739300	2179400	894410	801530	638060	1748485	1701349	1478088	--	--
pmp000004	331.08	316.06	330.074	C17H14O7	[M+H]+	4',5,7-Trihydroxy-3',6-dimethoxyflavone (Jaceosidin)	6353800	9539300	9272900	39915000	14081000	10385000	13222333	15280458	15502858	--	--
pmp000006	345.1	330.07	344.09	C18H16O7	[M+H]+	Eupatilin (5,7-Dihydroxy-3',4',6-Trimethoxyflavone)*	6406500	11446000	9603600	22867000	10968000	15991000	11890136	11522471	12374067	C10040	--
pmp000012	463.09	287.05	462.08	C21H18O12	[M+H]+	Scutellarein-7-O-glucuronide (Scutellarin)	7005000	7885200	7944140	1644700	2346700	2501400	4721724	4824015	4278609	--	--
pmp000106	313.11	298.1	312.1	C18H16O5	[M+H]+	5,7,4'-Trimethoxyflavone	591780	760300	768040	114410	35611	344490	464036	450775	369897	--	--
pmp000109	343.12	328.1	342.11	C19H18O6	[M+H]+	5,7,8,4'-Tetramethoxyflavone	19414	44154	36645	22419	9	21517	27883	28017	26068	--	--
pmp000110	359.11	344.1	358.105	C19H18O7	[M+H]+	7-Hydroxy-3,5,6,8-tetramethoxyflavone	13530	25215	16344	13427	3295.5	13756	11474	12571	14183	--	--
pmp000113	389.12	359.08	388.116	C20H20O8	[M+H]+	5-Hydroxy-6,7,8,3',4'-pentamethoxyflavone	118260	212370	185690	20676	25752	33902	84251	100539	114682	--	--
pmp000114	405.15	241.1	404.147	C21H24O8	[M+H]+	5,6,7,8,3',4'-Hexamethoxyflavanone	11329	8577.9	13328	26382	2331.8	15274	12836	15029	10303	--	--
pmp000126	611.16	593.2	610.153	C27H30O16	[M+H]+	Luteolin-6,8-di-C-glucoside	9154.9	16209	21487	10530	13683	53530	21346	22916	18386	C10102	--
pmp000161	315.09	271.06	314.079	C17H14O6	[M+H]+	5,2'-Dihydroxy-7,8-dimethoxyflavone	9862000	14324000	13600000	26387000	9202100	11661000	15534526	15367794	11462674	--	--
pmp000236	565.16	367.1	564.148	C26H28O14	[M+H]+	Apigenin-6-C-glucoside-8-O-xylcoside	204110	325600	271680	354230	392910	379870	325337	379809	303875	--	--
pmp000238	581.15	383.07	580.143	C26H28O15	[M+H]+	Luteolin-6-C-arabinoside-7-O-glucoside*	15536	23352	26063	73497	69078	72954	51472	55177	50323	--	--
pmp000412	447.13	297.07	446.121	C22H22O10	[M+H]+	3'-Methoxypuerarin	79909	68617	84970	157990	442670	301200	222067	158254	151460	--	--
pmp000571	271.06	153.01	270.053	C15H10O5	[M+H]+	Apigenin*	733300	755180	716950	2311430	2.01951e+06	2118121	1480506	1363663	1386727	C01477	ko00941,ko00943,ko00944,ko01100,ko01110
pmp000577	461.12	285.08	460.116	C26H20O8	[M+H]+	Acacetin-7-O-glucuronide	2781100	2768200	2760200	2506400	2348800	2711900	2413609	3015726	2418262	--	--
pmp000579	463.12	301.07	462.116	C22H22O11	[M+H]+	Diosmetin-7-O-galactoside	271560	422470	406640	353370	333400	778130	360755	392844	378683	--	--
pmp000581	475.12	271.06	474.116	C23H22O11	[M+H]+	Apigenin-7-O-(6''-acetyl)glucoside	633990	624690	582190	413400	437190	512830	436463	577652	575227	--	--
pmp000583	477.1	301.07	476.095	C22H20O12	[M+H]+	Diosmetin-7-O-glucuronide	6794500	6897700	7275900	8856500	8697400	8892600	8809372	6544494	7053071	--	--
pmp000585	519.11	433.11	518.106	C24H22O13	[M+H]+	Apigenin-7-O-(6''-malonyl)glucoside	48808	40692	44994	34603	63390	83782	61705	52935	43177	C10020	--
pmp000589	551.1	303.05	550.096	C24H22O15	[M+H]+	Quercetin-7-O-(6''-malonyl)glucoside*	82324	126300	134740	65962	54611	114510	95774	80783	89863	--	--
pmp000786	345.1	330.07	344.09	C18H16O7	[M+H]+	Eupatorin (5,3'-Dihydroxy-6,7,4'-trimethoxyflavone)	2067900	3559600	3141700	7931300	3767800	5127200	4321175	3942511	5094569	--	--
pmp000788	361.09	346.06	360.084	C18H16O8	[M+H]+	Chrysosplenol D	461650	794210	697770	2130500	999810	1774190	1095650	1064527	1338901	C04552	--
pmp001076	373.13	343.08	372.121	C20H20O7	[M+H]+	Isosinensetin	17009	34159	26638	32297	5655.5	21729	27302	20327	21259	--	--
pmp001106	595.17	577.16	594.158	C27H30O15	[M+H]+	Vitexin-2''-O-glucoside	119040	199340	190670	222660	243040	329940	257111	252826	174353	C04024	ko00944
pmp001161	389.12	328.1	388.116	C20H20O8	[M+H]+	5-Hydroxyauranetin	9777.9	17729	16581	5647	2265.8	3370.4	9010	8436	10700	--	--
pmp001290	623.12	271.06	622.117	C27H26O17	[M+H]+	Apigenin-7-O-(2''-glucurosyl)glucuronide	287330	238550	216820	249310	290770	376350	275473	250985	269217	--	--
pmp001309	465.1	303.1	464.095	C21H20O12	[M+H]+	6-Hydroxykaempferol-7-O-glucoside	1527000	2622100	1871400	2557500	2893500	2356200	2142958	2558368	2433896	--	--
pmp001310	627.16	303.1	626.148	C27H30O17	[M+H]+	6-Hydroxykaempferol-3,6-O-Diglucoside*	43857	46532	45438	110300	135760	147140	88094	86634	89170	--	--
pmp001311	627.16	303.1	626.148	C27H30O17	[M+H]+	6-Hydroxykaempferol-7,6-O-Diglucoside*	21686	33645	36566	192050	219640	37362	94416	75006	97523	--	--
Smlp003276	579.13	331.08	579.134	C26H27O15+	[M]+	Malvidin-3-O-(6''-O-malonyl)glucoside	4777.6	11140	4671.7	13422	2774.1	4488.1	7578	6197	7125	--	--
Smpp001442	479.15	303.05	479.155	C23H27O11+	[M]+	Delphinidin-3-O-glucuronide	15666	27349	21378	46402	58210	53245	31548	44330	41705	--	--
Smzp002660	933.27	271.06	933.266	C43H49O23+	[M]+	Pelargonidin-3-O-(6''-O-feruloyl-2''-O-glucosyl)glucoside-5-O-glucoside	3917.2	3791	6386.3	9528.9	7362.7	27663	11140	9155	11136	--	--
Smzp002914	903.26	271.06	903.255	C42H47O22+	[M]+	Pelargonidin-3-O-(6''-O-p-coumaroyl-2''-O-glucosyl)glucoside-5-O-glucoside	15428	19207	16266	2032.9	38943	32631	23785	22362	18609	--	--
Xmgp006913	341.14	137.06	340.131	C20H20O5	[M+H]+	2,4,2',4'-tetrahydroxy-3'-prenylchalcone	269550	431070	318460	451170	312020	592340	372626	367750	421336	--	--
Zmhn003257	299.06	284.04	300.063	C16H12O6	[M-H]-	5,7,2'-Trhiyroxy-8-methoxyflavone	391690	339430	357940	55555	5523.4	519320	273098	225664	235000	--	--
Zmhp002714	301.07	286.05	300.063	C16H12O6	[M+H]+	5,6,7-Tetrahydroxy-8-methoxyflavone*	35019000	22047000	36966000	29393000	33960000	32478000	34926963	37225249	27931585	--	--
Zmhp002734	347.08	332.06	346.068	C17H14O8	[M+H]+	5,7,2',5'-Tetrahydroxy-8,6'-dimethoxyflavone	9556100	15612000	12391000	9969000	3460600	4433900	8715341	8682400	10471368	--	--
Zmhp002776	431.1	255.07	430.09	C21H18O10	[M+H]+	Chrysin-7-O-Glucuronide	4622300	4152100	3614100	2143700	2079000	2515100	2940453	3488709	2901059	--	--
Zmhp002814	301.07	286.05	300.063	C16H12O6	[M+H]+	5,7,8-Tetrahydroxy-6-methoxyflavone*	3695200	9711200	9038400	7353500	6762800	9324500	6934125	7665908	7772429	--	--
Zmhp002868	461.11	285.31	460.101	C22H20O11	[M+H]+	Oroxylin A-7-O-glucuronide	2651100	2401600	2687100	2401500	2380600	2650900	2850752	2946299	2548217	--	--
Zmhp002964	491.12	315.1	490.111	C23H22O12	[M+H]+	5,7-Dihydroxy-6,8-dimethoxyflavone-7-O-glucoside	14820000	14869000	16663000	20895000	24413000	15783000	21256406	16880773	15490680	--	--
Zmhp003514	301.07	286.05	300.063	C16H12O6	[M+H]+	6,7,8-Tetrahydroxy-5-methoxyflavone*	1876000	2710700	2911300	865180	447900	917220	1783863	1356829	1896477	--	--
Zmhp004065	345.1	330.07	344.089	C18H16O7	[M+H]+	7,8-Dihydroxy-5,6,4'-trimethoxyflavone*	97000	131810	143400	1105700	540680	177450	369102	315797	429047	--	--
Zmhp004269	375.11	360.08	374.1	C19H18O8	[M+H]+	Skullcapflavone II	343450	505780	458030	773960	778310	792510	680392	577904	605138	C10183	--
Zmhp006502	549.12	301.07	548.117	C25H24O14	[M+H]+	Kaempferide-3-O-(6''-malonyl)glucoside	664760	758710	953120	792900	1389300	1408400	1017055	925877	1176368	--	--
Zmjp003291	595.17	433.12	594.158	C27H30O15	[M+H]+	"Vitexin-2""-O-galactoside"	80719	82097	76859	473510	469960	666370	273165	332110	251919	--	--
Zmjp004852	509.13	347.08	508.122	C23H24O13	[M+H]+	5,6,3′,4′-Tetrahydroxy-3,7-dimethoxyflavone-6-O-glucoside	17428000	27289000	21111000	22568000	9730200	10847000	16096140	18080116	20518285	--	--
Zmjp005610	523.14	361.09	522.137	C24H26O13	[M+H]+	Chrysosplenoside C	583940	562800	661530	1442400	1963800	2757300	1590780	1332083	1269786	--	--
Zmjp005959	523.15	361.1	522.137	C24H26O13	[M+H]+	Chrysosplenoside A	687330	653700	784250	1314100	1990200	2456200	1229874	1060642	1575336	--	--
Zmjp006451	537.16	375.11	536.153	C25H28O13	[M+H]+	Chrysosplenoside B	11161000	19793000	15865000	30459000	7766000	6949000	14355342	13346443	17924523	--	--
Zmjp006741	537.16	375.12	536.153	C25H28O13	[M+H]+	Chrysosplenoside E*	11548000	21053000	17531000	30655000	7998400	7370300	16436006	17508016	18997408	--	--
Zmjp008503	329.1	296.07	328.094	C18H16O6	[M+H]+	Salvigenin	58327	94387	68511	7039.3	9772.5	7275.6	34187	41427	37371	--	--
Zmjp009119	375.11	345.06	374.1	C19H18O8	[M+H]+	5,4′-Dihydroxy-3,6,7,3′-tetramethoxyflavone	1317200	2117200	1906100	2926700	1626900	1623300	2133322	1698408	2293763	--	--
Zmlp005013	331.04	299.02	330.038	C16H10O8	[M+H]+	3,3'-O-Dimethylellagic Acid	491520	805790	703460	588780	655490	672460	577775	608011	766671	--	--
Zmlp005019	463.09	331.05	462.08	C21H18O12	[M+H]+	3,3'-O-Dimethylellagic Acid-4'-O-arabinoside	100300	176310	150680	355240	165850	187410	177170	184903	191463	--	--
Zmlp007578	345.06	313.03	344.053	C17H12O8	[M+H]+	3,3',4-O-Trimethylellagic acid	255560	460290	405910	630030	609980	665240	436012	537600	455923	C10836	--
Zmxp002867	625.17	301.07	624.168	C28H32O16	[M+H]+	Chrysoeriol-5,7-di-O-glucoside*	1260700	1437400	1954000	3080600	3966300	5878300	2771514	3451957	2867219	--	--
Zmxp005470	579.13	331.08	578.127	C26H26O15	[M+H]+	Tricin-7-O-(6''-O-malonyl)glucoside	3145000	3552200	3685400	586670	2246300	1878100	2234546	2418331	2077578	--	--
